# Supplementary material for: Immune signatures correlate with L1 retrotransposition in gastrointestinal cancers
Source: PubMed Central journal article supplement — Genome Res. 2018 Aug;28(8):1136–46. doi: 10.1101/gr.231837.117 (PMC6071633; doi:10.1101/gr.231837.117), 2018-08
Supplement: supp_gr.231837.117_Supplemental_Fig_S1.pdf [file supp_gr.231837.117_Supplemental_Fig_S1.pdf]

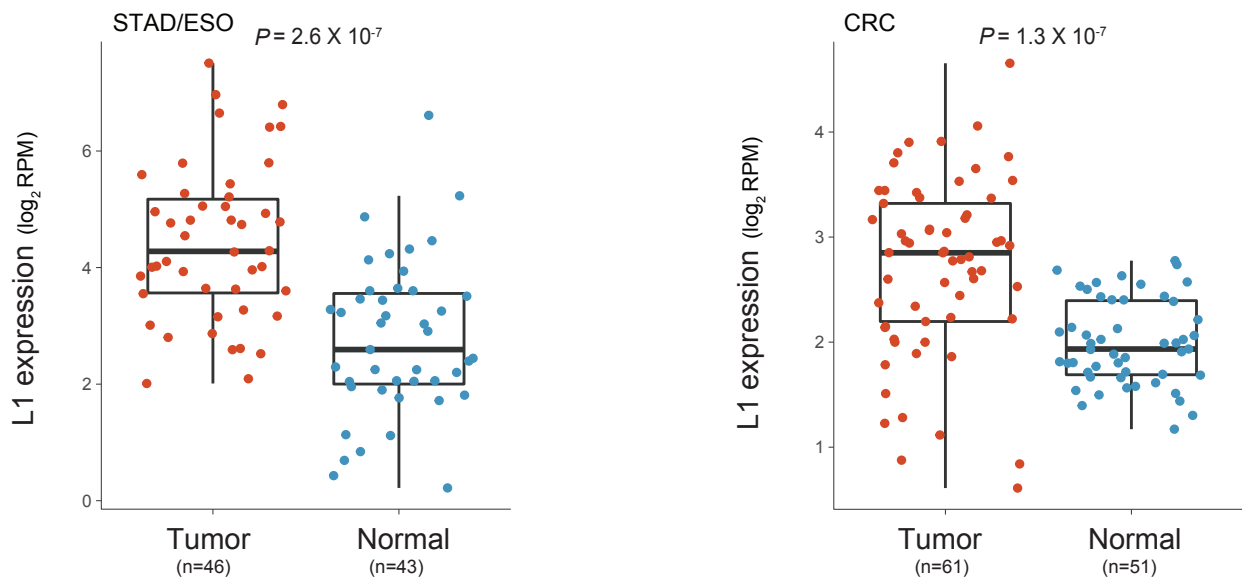

**Supplemental Figure S1. L1 expression in normal tissues.** L1 expression of normal gastrointestinal tissues was compared to that of tumor tissues. The Mann-Whitney U test was used to test a statistical significance.
