# Supplementary material for: Immune signatures correlate with L1 retrotransposition in gastrointestinal cancers
Source: PubMed Central journal article supplement — Genome Res. 2018 Aug;28(8):1136–46. doi: 10.1101/gr.231837.117 (PMC6071633; doi:10.1101/gr.231837.117), 2018-08
Supplement: supp_gr.231837.117_Supplemental_Fig_S2.pdf [file supp_gr.231837.117_Supplemental_Fig_S2.pdf]

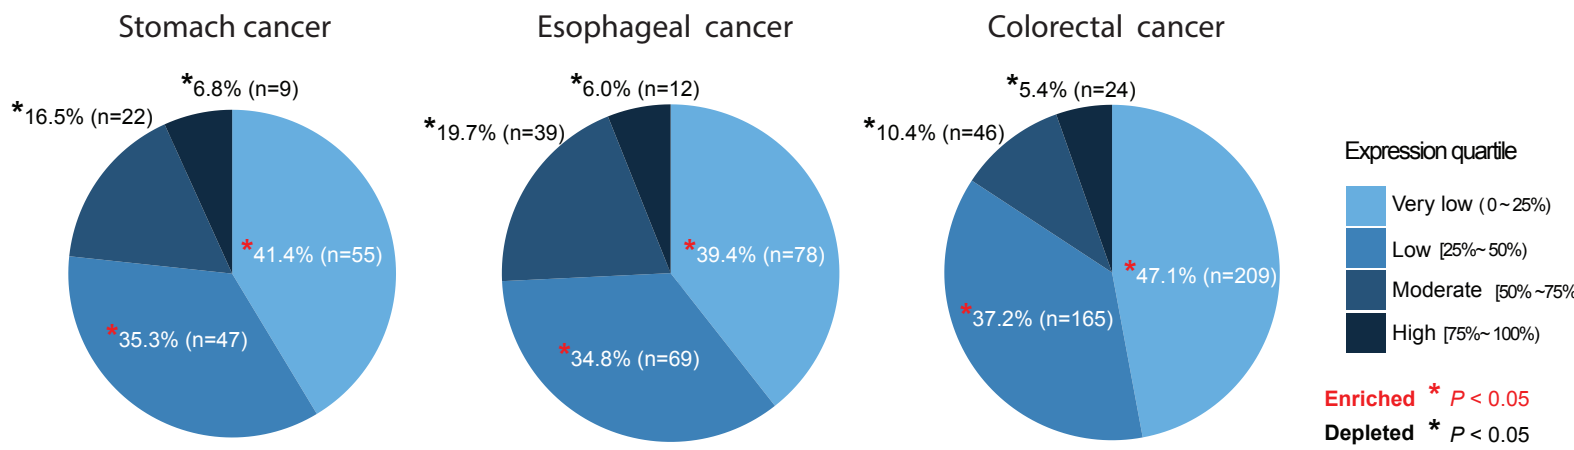

**Supplemental Figure S2. Distribution of expression level of genes with somatic L1 insertions.**

Genes with somatic L1 insertions were divided into quartiles based upon their expression level for each cancer type. The number of genes in each category is shown in parentheses. Expression level categories showing enrichment and depletion (Binomial test  $P < 0.05$ ) of L1 insertions are marked with red and black asterisks, respectively.
