# Supplementary material for: Immune signatures correlate with L1 retrotransposition in gastrointestinal cancers
Source: PubMed Central journal article supplement — Genome Res. 2018 Aug;28(8):1136–46. doi: 10.1101/gr.231837.117 (PMC6071633; doi:10.1101/gr.231837.117), 2018-08
Supplement: supp_gr.231837.117_Supplemental_Fig_S3.pdf [file supp_gr.231837.117_Supplemental_Fig_S3.pdf]

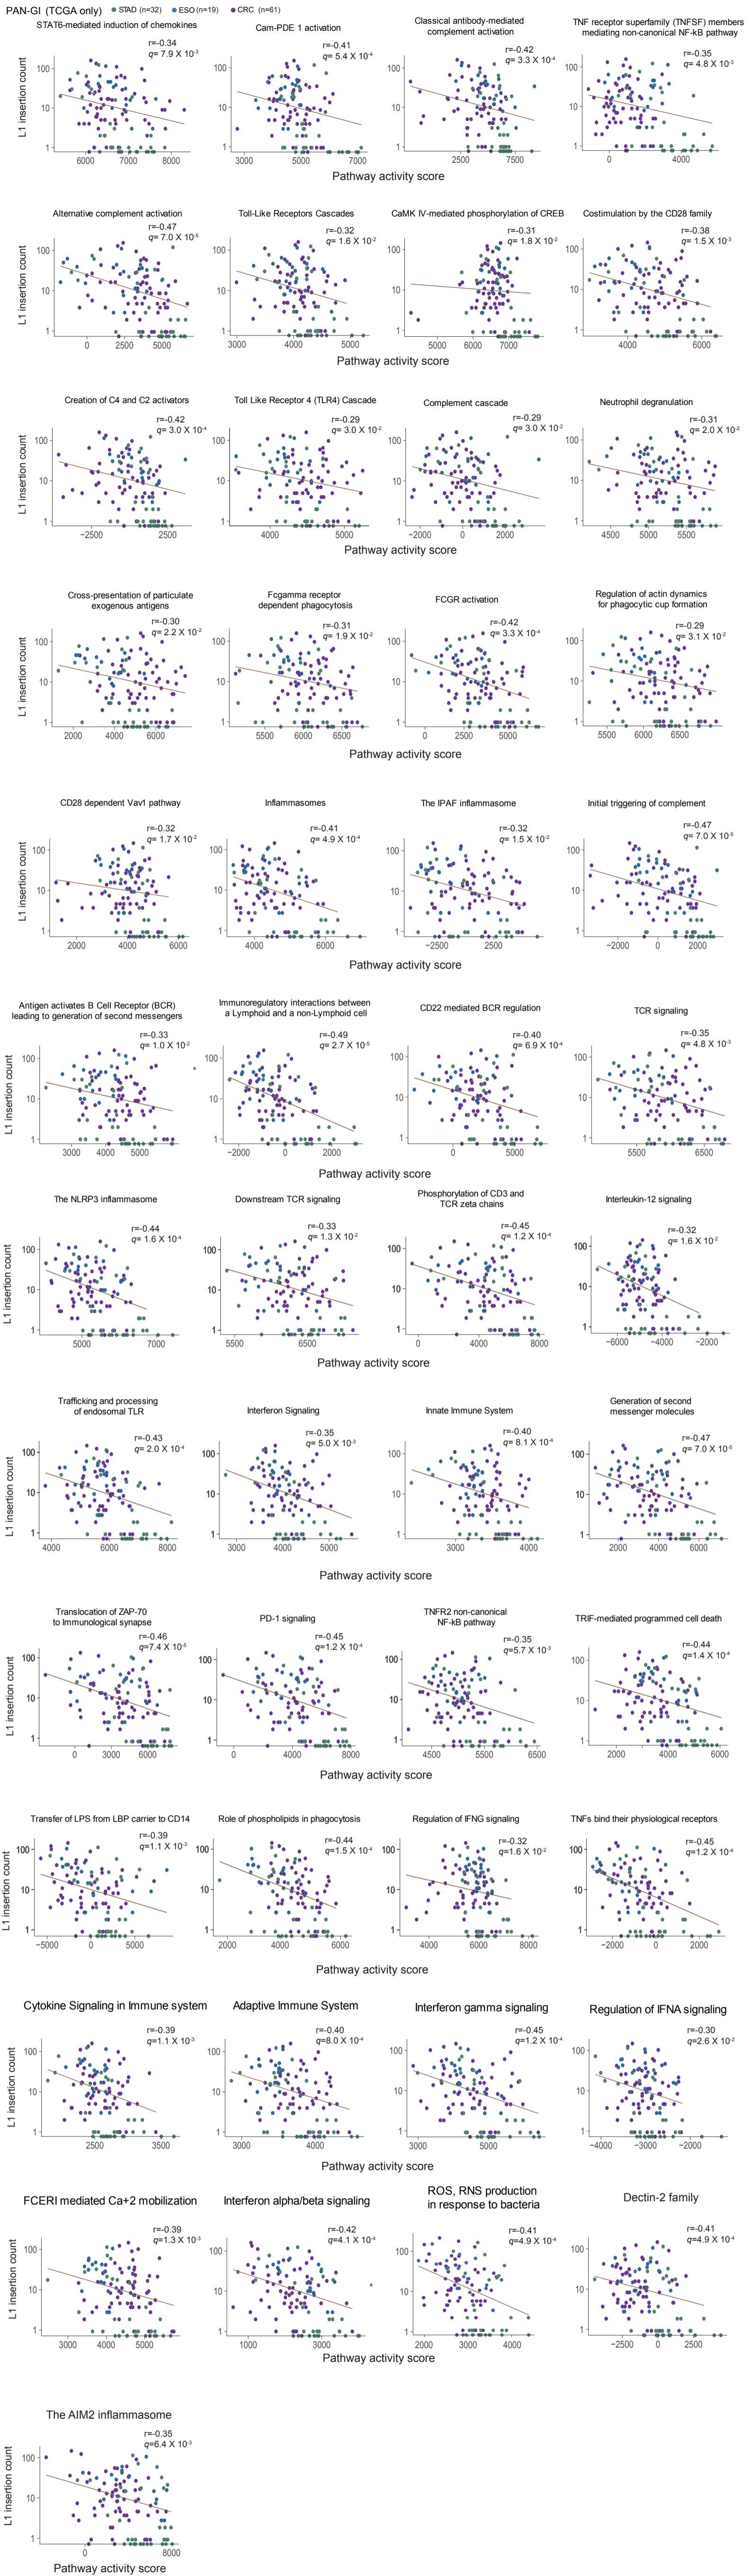

**Supplemental Figure S3. Immune pathways whose activities are inversely correlated with L1 insertion frequency.** 49 significant immune pathways (FDR < 0.05) are shown with Spearman correlation coefficients and their P values.
