# Supplementary material for: Immune signatures correlate with L1 retrotransposition in gastrointestinal cancers
Source: PubMed Central journal article supplement — Genome Res. 2018 Aug;28(8):1136–46. doi: 10.1101/gr.231837.117 (PMC6071633; doi:10.1101/gr.231837.117), 2018-08
Supplement: supp_gr.231837.117_Supplemental_Fig_S4.pdf [file supp_gr.231837.117_Supplemental_Fig_S4.pdf]

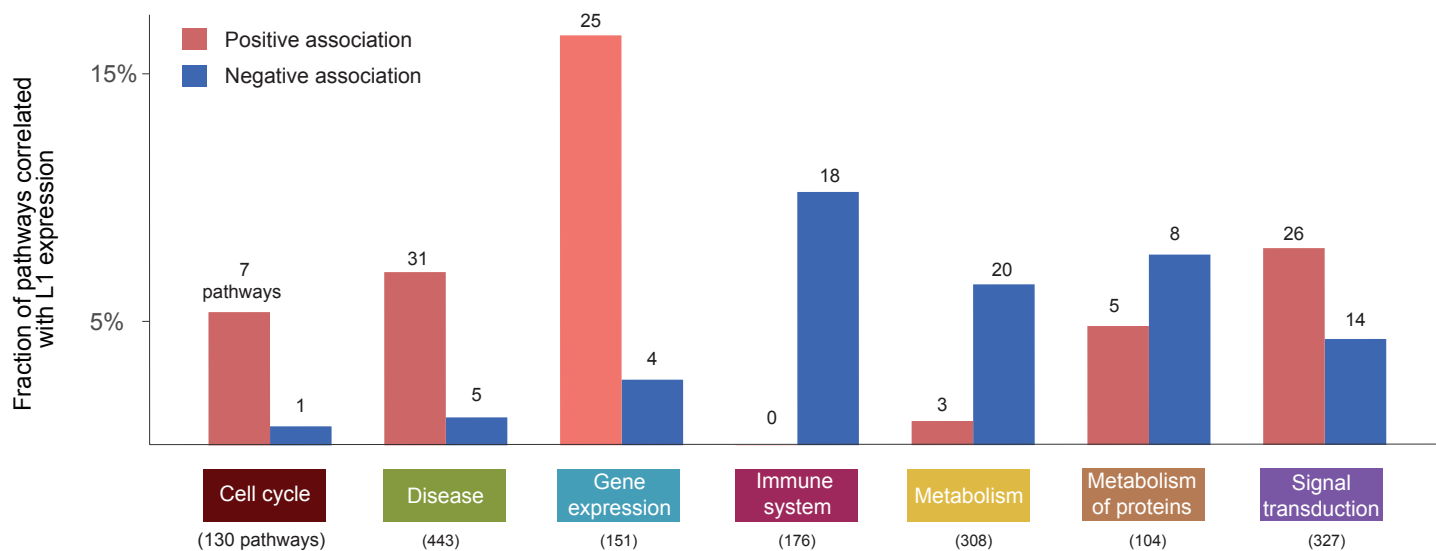

**Supplemental Figure S4. Pathways associated with L1 expression.** Reactome pathways whose activity correlates with L1 expression level. A total of 214 pathways (FDR < 0.05) showed significant associations. For each pathway category, the percentage of pathways showing a significant positive or negative correlation (FDR < 5%) is shown. The number of significant pathways is shown on top of each bar. Categories with more than 100 member pathways are shown.
