# Supplementary material for: Immune signatures correlate with L1 retrotransposition in gastrointestinal cancers
Source: PubMed Central journal article supplement — Genome Res. 2018 Aug;28(8):1136–46. doi: 10.1101/gr.231837.117 (PMC6071633; doi:10.1101/gr.231837.117), 2018-08
Supplement: supp_gr.231837.117_Supplemental_Fig_S5.pdf [file supp_gr.231837.117_Supplemental_Fig_S5.pdf]

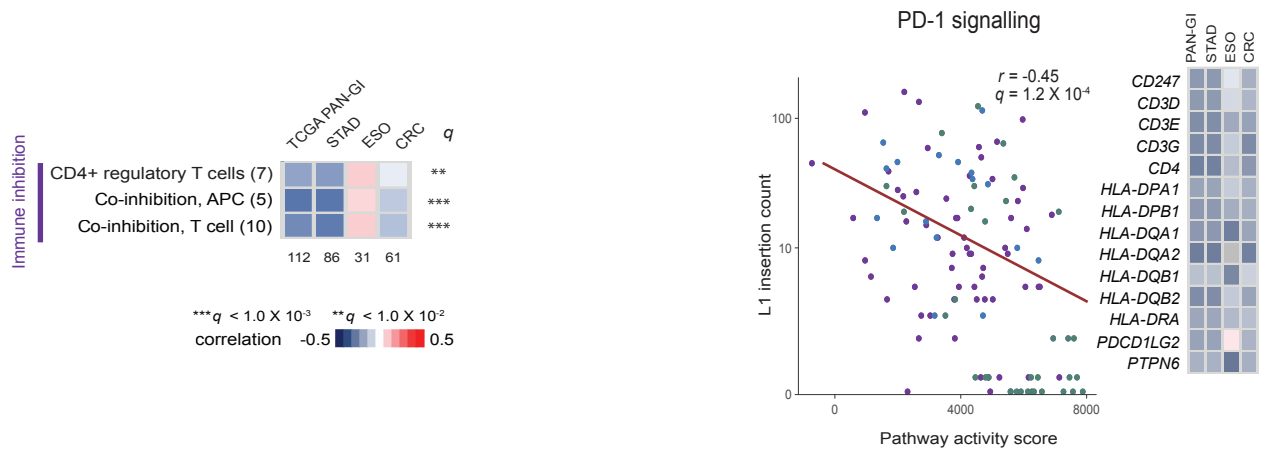

**Supplemental Figure S5. Relationship between L1 activity and immune-inhibitory signatures including PD-1 signaling**
