# Supplementary material for: Immune signatures correlate with L1 retrotransposition in gastrointestinal cancers
Source: PubMed Central journal article supplement — Genome Res. 2018 Aug;28(8):1136–46. doi: 10.1101/gr.231837.117 (PMC6071633; doi:10.1101/gr.231837.117), 2018-08
Supplement: supp_gr.231837.117_Supplemental_Fig_S7.pdf [file supp_gr.231837.117_Supplemental_Fig_S7.pdf]

All genes (n=904)

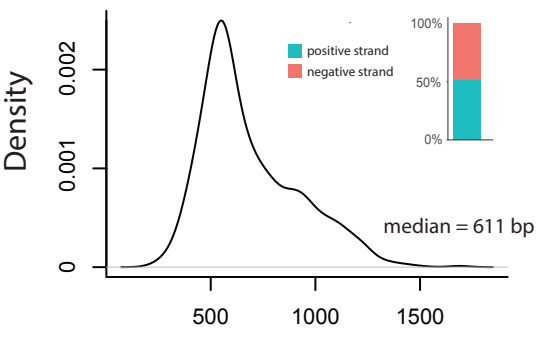

Highly recurrent genes (n=20)

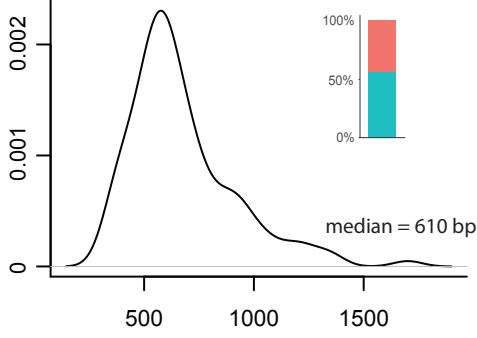

Significantly recurrent genes (n=81)

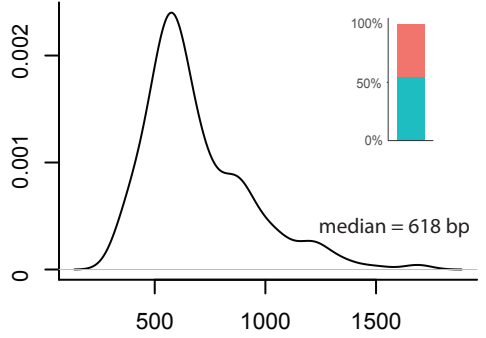

Size of L1 insertions (bp)

**Supplemental Figure S7. Distribution of size and orientation of somatic L1 insertions**
