# Supplementary material for: Immune signatures correlate with L1 retrotransposition in gastrointestinal cancers
Source: HighWire-hosted journal article supplement (doi:10.1101/gr.231837.117), 2018-07-03
Supplement: Supplemental_Table_S2.xlsx [file Supplemental_Table_S2.xlsx]

## Sheet: Sheet1
Supplemental Table S2. Summary of somatic L1 insertions
Caner type	Sample ID	Solo	Partnered	Orphan	Total
ESO	ESO-1060	7	0	0	7
ESO	ESO-1163	3	0	0	3
ESO	ESO-130	2	0	0	2
ESO	ESO-327	1	0	0	1
ESO	ESO-409	2	0	1	3
ESO	ESO-601	0	0	0	0
ESO	ESO-682	0	0	0	0
ESO	ESO-718	9	0	0	9
ESO	ESO-721	0	0	0	0
ESO	ESO-774	29	0	0	29
ESO	ESO-837	2	0	0	2
ESO	ESO-838	67	0	1	68
ESO	ESO-913	3	0	0	3
ESO	TCGA-IG-A3YB	8	0	0	8
ESO	TCGA-IG-A97I	3	0	0	3
ESO	TCGA-JY-A93C	11	1	0	12
ESO	TCGA-L5-A4OF	46	0	0	46
ESO	TCGA-L5-A4OJ	110	0	5	115
ESO	TCGA-L5-A4OR	36	1	1	38
ESO	TCGA-L5-A891	9	0	1	10
ESO	TCGA-L5-A8NE	45	0	1	46
ESO	TCGA-L5-A8NN	34	0	0	34
ESO	TCGA-L7-A6VZ	31	0	0	31
ESO	TCGA-LN-A49L	64	0	0	64
ESO	TCGA-LN-A49M	17	0	0	17
ESO	TCGA-LN-A49Y	19	0	0	19
ESO	TCGA-LN-A4A1	16	0	0	16
ESO	TCGA-LN-A4A4	41	0	0	41
ESO	TCGA-LN-A5U5	3	0	0	3
ESO	TCGA-LN-A8I1	10	0	0	10
ESO	TCGA-LN-A9FQ	51	1	0	52
ESO	TCGA-V5-A7RC	65	0	0	65
STAD	pfg005	4	0	0	4
STAD	pfg008	20	0	0	20
STAD	pfg022	2	0	0	2
STAD	pfg030	36	1	2	39
STAD	pfg031	7	0	0	7
STAD	pfg035	37	4	0	41
STAD	pfg036	2	0	0	2
STAD	pfg038	10	0	3	13
STAD	pfg039	13	0	0	13
STAD	pfg043	0	0	0	0
STAD	pfg050	4	0	0	4
STAD	pfg059	3	0	0	3
STAD	pfg060	17	1	0	18
STAD	pfg062	0	0	0	0
STAD	pfg064	6	2	0	8
STAD	pfg065	12	0	0	12
STAD	pfg068	5	0	0	5
STAD	pfg072	1	0	0	1
STAD	pfg073	11	1	0	12
STAD	pfg081	57	1	0	58
STAD	pfg089	13	0	0	13
STAD	pfg097	1	0	0	1
STAD	pfg116	33	1	0	34
STAD	pfg119	27	0	0	27
STAD	pfg121	2	0	0	2
STAD	pfg122	537	2	0	539
STAD	pfg124	9	0	0	9
STAD	pfg127	47	1	0	48
STAD	pfg145	1	0	0	1
STAD	pfg156	0	0	0	0
STAD	pfg160	28	0	0	28
STAD	pfg164	1	0	0	1
STAD	pfg166	25	0	1	26
STAD	pfg182	9	1	0	10
STAD	pfg205	5	0	1	6
STAD	pfg212	11	0	0	11
STAD	pfg213	16	0	0	16
STAD	pfg217	79	0	4	83
STAD	pfg220	10	0	0	10
STAD	pfg222	20	0	1	21
STAD	pfg228	2	0	0	2
STAD	pfg272	6	0	3	9
STAD	pfg277	31	0	3	34
STAD	pfg282	11	0	0	11
STAD	pfg311	1	0	0	1
STAD	pfg316	12	0	0	12
STAD	pfg317	10	0	0	10
STAD	pfg344	31	1	0	32
STAD	pfg373	12	0	0	12
STAD	pfg375	1	0	0	1
STAD	pfg378	0	0	0	0
STAD	pfg398	2	0	0	2
STAD	pfg413	15	2	0	17
STAD	pfg416	8	0	0	8
STAD	pfg424	2	0	0	2
STAD	TCGA-BR-4255	1	0	0	1
STAD	TCGA-BR-4280	1	0	0	1
STAD	TCGA-BR-6452	0	0	0	0
STAD	TCGA-BR-6456	0	0	0	0
STAD	TCGA-BR-6564	0	0	0	0
STAD	TCGA-BR-7722	0	0	0	0
STAD	TCGA-BR-8373	3	1	0	4
STAD	TCGA-BR-8381	1	0	0	1
STAD	TCGA-BR-8486	0	0	0	0
STAD	TCGA-BR-8682	0	0	0	0
STAD	TCGA-BR-8690	19	0	0	19
STAD	TCGA-BR-A4J4	0	0	0	0
STAD	TCGA-CD-5799	3	0	0	3
STAD	TCGA-CD-5802	19	0	3	22
STAD	TCGA-CD-8529	0	0	0	0
STAD	TCGA-CG-4442	2	0	0	2
STAD	TCGA-CG-4443	0	0	0	0
STAD	TCGA-CG-4474	0	0	0	0
STAD	TCGA-CG-5723	2	0	0	2
STAD	TCGA-CG-5724	33	1	1	35
STAD	TCGA-CG-5730	0	0	0	0
STAD	TCGA-D7-5579	7	1	0	8
STAD	TCGA-D7-6518	0	0	0	0
STAD	TCGA-D7-6519	1	0	0	1
STAD	TCGA-D7-6527	124	0	0	124
STAD	TCGA-D7-6528	1	0	0	1
STAD	TCGA-D7-6815	16	0	0	16
STAD	TCGA-D7-6822	20	0	0	20
STAD	TCGA-D7-8570	2	0	0	2
STAD	TCGA-D7-A4YX	2	0	0	2
STAD	TCGA-EQ-5647	29	0	0	29
STAD	TCGA-F1-6177	22	0	1	23
STAD	TCGA-F1-6875	30	0	0	30
STAD	TCGA-FP-7998	0	0	0	0
STAD	TCGA-HF-7136	30	0	0	30
STAD	TCGA-HU-8245	3	0	0	3
STAD	TCGA-HU-8608	0	0	0	0
STAD	TCGA-HU-A4G6	1	0	0	1
STAD	TCGA-HU-A4H0	1	0	0	1
STAD	TCGA-IN-7806	73	1	3	77
CRC	TCGA-A6-2680	36	0	0	36
CRC	TCGA-A6-2681	1	0	3	4
CRC	TCGA-A6-2683	2	0	0	2
CRC	TCGA-A6-3807	7	0	0	7
CRC	TCGA-A6-6141	6	0	0	6
CRC	TCGA-A6-6781	13	0	1	14
CRC	TCGA-A6-A565	1	0	0	1
CRC	TCGA-A6-A566	21	0	2	23
CRC	TCGA-A6-A567	17	0	0	17
CRC	TCGA-A6-A56B	111	0	0	111
CRC	TCGA-AA-3514	3	0	1	4
CRC	TCGA-AA-3516	24	1	4	29
CRC	TCGA-AA-3518	89	9	0	98
CRC	TCGA-AA-3529	124	0	10	134
CRC	TCGA-AA-3534	3	0	0	3
CRC	TCGA-AA-3555	0	0	0	0
CRC	TCGA-AA-3664	16	0	1	17
CRC	TCGA-AA-3666	1	0	0	1
CRC	TCGA-AA-3685	1	0	0	1
CRC	TCGA-AA-3956	24	0	0	24
CRC	TCGA-AA-3977	17	0	0	17
CRC	TCGA-AA-3994	6	0	1	7
CRC	TCGA-AA-A01R	5	0	0	5
CRC	TCGA-AA-A01S	6	0	0	6
CRC	TCGA-AA-A01T	16	0	0	16
CRC	TCGA-AA-A01V	8	0	1	9
CRC	TCGA-AA-A01X	13	0	2	15
CRC	TCGA-AA-A02O	59	0	0	59
CRC	TCGA-AA-A02Y	5	0	0	5
CRC	TCGA-AA-A03F	2	1	0	3
CRC	TCGA-AD-6964	18	0	0	18
CRC	TCGA-AD-A5EJ	157	3	0	160
CRC	TCGA-AD-A5EK	7	0	1	8
CRC	TCGA-AF-2689	11	0	0	11
CRC	TCGA-AF-2691	0	0	0	0
CRC	TCGA-AF-3913	28	0	0	28
CRC	TCGA-AG-3574	2	0	0	2
CRC	TCGA-AG-3582	12	0	0	12
CRC	TCGA-AG-3593	10	0	0	10
CRC	TCGA-AG-3727	17	0	0	17
CRC	TCGA-AG-3885	9	0	0	9
CRC	TCGA-AG-3890	4	0	0	4
CRC	TCGA-AG-3896	10	0	0	10
CRC	TCGA-AG-3901	9	0	0	9
CRC	TCGA-AG-4007	31	0	3	34
CRC	TCGA-AG-4008	12	0	0	12
CRC	TCGA-AG-4015	5	0	0	5
CRC	TCGA-AG-A032	5	0	0	5
CRC	TCGA-AY-A54L	42	0	3	45
CRC	TCGA-AZ-6601	4	0	1	5
CRC	TCGA-CA-6717	1	0	0	1
CRC	TCGA-CA-6718	1	0	0	1
CRC	TCGA-D5-6540	36	12	2	50
CRC	TCGA-EI-6917	4	0	1	5
CRC	TCGA-F5-6814	3	1	0	4
CRC	TCGA-NH-A50T	4	0	0	4
CRC	TCGA-NH-A50V	7	1	1	9
CRC	TCGA-QG-A5YV	25	0	2	27
CRC	TCGA-QG-A5YW	57	2	1	60
CRC	TCGA-QG-A5YX	21	2	2	25
CRC	TCGA-QG-A5Z1	39	0	0	39
CRC	TCGA-QG-A5Z2	65	0	1	66
Total		3748	57	80	3885
