# Supplementary material for: Immune signatures correlate with L1 retrotransposition in gastrointestinal cancers
Source: HighWire-hosted journal article supplement (doi:10.1101/gr.231837.117), 2018-07-03
Supplement: Supplemental_Table_S5.xlsx [file Supplemental_Table_S5.xlsx]

## Sheet: Sheet1
Supplemental Table S5. Mutated genes associated with L1 insertions
Gene	# of samples		p value	FDR	Average insertions
	MUT	WT			MUT	WT
TP53	110	78	0.00348124	0.0452561	26.7909	11.6538
CSMD1	41	147	0.0131546	0.0855047	38.4146	15.517
TTN	92	96	0.0384713	0.166709	27.6087	13.7083
SYNE1	51	137	0.16566	0.538396	32.549	16.0292
APC	65	123	0.240743	0.625932	26.0154	17.6016
LRP1B	41	147	0.414374	0.897809	17.0732	21.4694
DNAH5	40	148	0.6122	0.97052	31.35	17.5811
PIK3CA	40	148	0.663744	0.97052	18.325	21.1014
PCLO	41	147	0.736442	0.97052	20.3415	20.5578
RYR3	39	149	0.784684	0.97052	19.9744	20.651
FLG	42	146	0.88847	0.97052	29.6905	17.8699
CSMD3	40	148	0.964669	0.97052	18.025	21.1824
MUC16	48	140	0.97052	0.97052	31.0625	16.8929
