# Supplementary material for: Immune signatures correlate with L1 retrotransposition in gastrointestinal cancers
Source: HighWire-hosted journal article supplement (doi:10.1101/gr.231837.117), 2018-07-03
Supplement: Supplemental_Table_S6.xlsx [file Supplemental_Table_S6.xlsx]

## Sheet: Sheet1
Supplemental Table S6. Pathways significantly associated with somatic L1 retrotransposition
pathway name	coef	q-value
Binding and entry of HIV virion	-0.494678	2.65e-05
Immunoregulatory interactions between a Lymphoid and a non-Lymphoid cell	-0.494665	2.65e-05
Alternative complement activation	-0.472379	7.01e-05
Generation of second messenger molecules	-0.470282	7.01e-05
Initial triggering of complement	-0.467476	7.01e-05
Ligand-dependent caspase activation	-0.465328	7.01e-05
Translocation of ZAP-70 to Immunological synapse	-0.462145	7.44e-05
TNFs bind their physiological receptors	-0.450203	0.000122822
Interferon gamma signaling	-0.449947	0.000122822
Phosphorylation of CD3 and TCR zeta chains	-0.447769	0.000122822
PD-1 signaling	-0.447183	0.000122822
IRAK4 deficiency (TLR2/4)	-0.444855	0.000122822
MyD88 deficiency (TLR2/4)	-0.444855	0.000122822
TRIF-mediated programmed cell death	-0.441026	0.000144479
Role of phospholipids in phagocytosis	-0.439439	0.000149167
The NLRP3 inflammasome	-0.437205	0.0001611
Trafficking and processing of endosomal TLR	-0.432803	0.000197953
Creation of C4 and C2 activators	-0.424828	0.000301317
Classical antibody-mediated complement activation	-0.422564	0.000325968
FCGR activation	-0.421354	0.00033294
Interferon alpha/beta signaling	-0.416934	0.000409995
GPVI-mediated activation cascade	-0.414906	0.000439364
Diseases associated with the TLR signaling cascade	-0.413366	0.000440042
Diseases of Immune System	-0.413366	0.000440042
ROS, RNS production in response to bacteria	-0.41067	0.000490873
Inflammasomes	-0.410024	0.000490873
Cam-PDE 1 activation	-0.407701	0.000538989
Complement cascade	-0.403915	0.000639286
CD22 mediated BCR regulation	-0.40151	0.000686167
The role of Nef in HIV-1 replication and disease pathogenesis	-0.401407	0.000686167
Adaptive Immune System	-0.398066	0.000796839
Innate Immune System	-0.397244	0.000811094
Caspase activation via extrinsic apoptotic signalling pathway	-0.392277	0.00100029
Signalling to STAT3	-0.392179	0.00100029
Transfer of LPS from LBP carrier to CD14	-0.389714	0.00109389
Chemokine receptors bind chemokines	-0.389381	0.00109389
FCERI mediated Ca+2 mobilization	-0.385795	0.00128687
Class A/1 (Rhodopsin-like receptors)	-0.384768	0.00131895
Cytokine Signaling in Immune system	-0.38372	0.00135856
Keratinization	0.382993	0.0013783
Costimulation by the CD28 family	-0.381067	0.00148439
TRKA activation by NGF	-0.379005	0.00160674
Formation of the cornified envelope	0.366735	0.00290563
Nef and signal transduction	-0.364356	0.00318945
G alpha (i) signalling events	-0.36249	0.00341293
TET1,2,3 and TDG demethylate DNA	0.361292	0.0035372
Peptide ligand-binding receptors	-0.360467	0.00360285
TCR signaling	-0.353873	0.00475313
TNF receptor superfamily (TNFSF) members mediating non-canonical NF-kB pathway	-0.353523	0.00475313
HDMs demethylate histones	0.353321	0.00475313
Interferon Signaling	-0.351871	0.00498729
TNFR2 non-canonical NF-kB pathway	-0.348495	0.00572149
Dectin-2 family	-0.345582	0.00641772
Nef-mediates down modulation of cell surface receptors by recruiting them to clathrin adapters	-0.341911	0.00744252
STAT6-mediated induction of chemokines	-0.340152	0.00790942
Nef mediated downregulation of CD28 cell surface expression	-0.339558	0.00797822
Nucleotide-like (purinergic) receptors	-0.334197	0.00994533
Antigen activates B Cell Receptor (BCR) leading to generation of second messengers	-0.333632	0.0100196
Negative regulation of TCF-dependent signaling by DVL-interacting proteins	0.328489	0.0119954
N-glycan trimming and elongation in the cis-Golgi	-0.328455	0.0119954
Lactose synthesis	0.328339	0.0119954
G-protein beta:gamma signalling	-0.327758	0.0121017
Downstream TCR signaling	-0.325982	0.0128529
Platelet activation, signaling and aggregation	-0.323714	0.0139364
G beta:gamma signalling through PI3Kgamma	-0.322782	0.0142756
Transcriptional regulation by the AP-2 (TFAP2) family of transcription factors	0.321836	0.0144141
The AIM2 inflammasome	-0.321836	0.0144141
The IPAF inflammasome	-0.319543	0.0154292
Prostanoid ligand receptors	-0.319517	0.0154292
Regulation of IFNG signaling	-0.319004	0.015539
Toll-Like Receptors Cascades	-0.318422	0.0156968
Interleukin-12 signaling	-0.317391	0.0161578
CD28 dependent Vav1 pathway	-0.315799	0.0170231
CaMK IV-mediated phosphorylation of CREB	-0.313656	0.0183428
BH3-only proteins associate with and inactivate anti-apoptotic BCL-2 members	-0.311782	0.018844
Activation of gene expression by SREBF (SREBP)	0.311773	0.018844
TGFBR2 MSI Frameshift Mutants in Cancer	-0.311747	0.018844
Gap junction degradation	0.311709	0.018844
Hexose transport	0.311097	0.0190431
VLDL biosynthesis	-0.310413	0.0190431
Fcgamma receptor (FCGR) dependent phagocytosis	-0.31022	0.0190431
Cholesterol biosynthesis	0.31022	0.0190431
Transport of Mature mRNA derived from an Intron-Containing Transcript	0.309403	0.0193183
RHO GTPases Activate Formins	0.30927	0.0193183
Neutrophil degranulation	-0.308333	0.0198265
Adrenoceptors	-0.306515	0.0210801
Transport of Mature Transcript to Cytoplasm	0.305972	0.0212955
Cross-presentation of particulate exogenous antigens (phagosomes)	-0.304863	0.0214683
Regulation by c-FLIP	-0.304641	0.0214683
Dimerization of procaspase-8	-0.304641	0.0214683
CASP8 activity is inhibited	-0.304641	0.0214683
Apoptotic cleavage of cell adhesion proteins	0.30423	0.0215843
Toxicity of botulinum toxin type D (BoNT/D)	-0.303007	0.0221745
Toxicity of botulinum toxin type F (BoNT/F)	-0.303007	0.0221745
Apoptotic execution phase	0.299293	0.0253869
Regulation of IFNA signaling	-0.297979	0.0259604
Small interfering RNA (siRNA) biogenesis	0.29759	0.0259604
Signaling by Overexpressed Wild-Type EGFR in Cancer	0.297359	0.0259604
Inhibition of Signaling by Overexpressed EGFR	0.297359	0.0259604
Arachidonic acid metabolism	-0.296974	0.0259604
Regulation of cholesterol biosynthesis by SREBP (SREBF)	0.296923	0.0259604
Rhesus glycoproteins mediate ammonium transport.	0.296888	0.0259604
Activation of CaMK IV	-0.294039	0.0285066
Export of Viral Ribonucleoproteins from Nucleus	0.293953	0.0285066
Toll Like Receptor 4 (TLR4) Cascade	-0.29228	0.0300974
Interaction With The Zona Pellucida	0.291737	0.0304359
Regulation of actin dynamics for phagocytic cup formation	-0.290471	0.0312644
Sodium-coupled phosphate cotransporters	0.290312	0.0312644
RAS signaling downstream of NF1 loss-of-function variants	0.290133	0.0312644
VLDL interactions	-0.289688	0.0312644
Synthesis of PC	0.289474	0.0312644
Formation of tubulin folding intermediates by CCT/TriC	0.289431	0.0312644
IRAK4 deficiency (TLR5)	-0.289337	0.0312644
GPCR ligand binding	-0.288306	0.0322153
Striated Muscle Contraction	-0.284262	0.0371278
GABA A (rho) receptor activation	0.283035	0.0385144
Signaling by Rho GTPases	0.282324	0.0391959
Keratan sulfate degradation	-0.281858	0.0395347
Uptake and function of diphtheria toxin	0.281345	0.0399469
Golgi-to-ER retrograde transport	0.28001	0.0415929
PKMTs methylate histone lysines	0.279488	0.0418126
Synthesis of (16-20)-hydroxyeicosatetraenoic acids (HETE)	-0.279411	0.0418126
Transport of Mature mRNAs Derived from Intronless Transcripts	0.278897	0.0421782
Elevation of cytosolic Ca2+ levels	-0.278504	0.0421782
Glucose transport	0.278166	0.0421782
Synthesis of PIPs at the late endosome membrane	0.278153	0.0421782
Formation of annular gap junctions	0.278063	0.0421782
Transport of Ribonucleoproteins into the Host Nucleus	0.276882	0.04354
Transport of Mature mRNA Derived from an Intronless Transcript	0.276749	0.04354
P2Y receptors	-0.276364	0.0438078
Nuclear import of Rev protein	0.27464	0.0459503
Resolution of Sister Chromatid Cohesion	0.274606	0.0459503
NEP/NS2 Interacts with the Cellular Export Machinery	0.274234	0.0462149
Other semaphorin interactions	-0.27328	0.0474553
Interactions of Tat with host cellular proteins	-0.272993	0.047586
TFAP2 (AP-2) family regulates transcription of cell cycle factors	0.272509	0.0480534
TGFBR2 Kinase Domain Mutants in Cancer	-0.271602	0.04855
Loss of Function of TGFBR2 in Cancer	-0.271602	0.04855
TGFBR1 LBD Mutants in Cancer	-0.271602	0.04855
Rev-mediated nuclear export of HIV RNA	0.270982	0.0486863
Chromatin modifying enzymes	0.270918	0.0486863
Chromatin organization	0.270918	0.0486863
Interactions of Rev with host cellular proteins	0.269891	0.0492418
Vpr-mediated nuclear import of PICs	0.269831	0.0492418
snRNP Assembly	0.269805	0.0492418
Metabolism of non-coding RNA	0.269805	0.0492418
Mitotic Prometaphase	0.269386	0.0496313
