# Supplementary material for: Immune signatures correlate with L1 retrotransposition in gastrointestinal cancers
Source: HighWire-hosted journal article supplement (doi:10.1101/gr.231837.117), 2018-07-03
Supplement: Supplemental_Table_S7.xlsx [file Supplemental_Table_S7.xlsx]

## Sheet: Sheet1
Supplemental Table S7. Pathways significantly associated with L1 expression
pathway name	coef	q-value
Sulfide oxidation to sulfate	-0.538507	5.58e-06
TET1,2,3 and TDG demethylate DNA	0.509003	2.64e-05
TNFR1-mediated ceramide production	-0.487937	5.26e-05
Loss of Nlp from mitotic centrosomes	0.486091	5.26e-05
Loss of proteins required for interphase microtubule organizationA?from the centrosome	0.486091	5.26e-05
mRNA 3'-end processing	0.461267	0.000218977
Activation, translocation and oligomerization of BAX	-0.458499	0.000222983
TNFs bind their physiological receptors	-0.451056	0.000306538
Catabolism of glucuronate to xylulose-5-phosphate	-0.447666	0.0003222
Gap junction degradation	0.445058	0.0003222
BMAL1:CLOCK,NPAS2 activates circadian gene expression	0.444898	0.0003222
AURKA Activation by TPX2	0.44299	0.00033115
Anchoring of the basal body to the plasma membrane	0.437801	0.000364713
Depurination	-0.436392	0.000364713
Recognition and association of DNA glycosylase with site containing an affected purine	-0.436392	0.000364713
Cleavage of the damaged purine	-0.436392	0.000364713
Apoptotic execution phase	0.435262	0.000366424
Cohesin Loading onto Chromatin	0.425594	0.000588143
Synthesis of PIPs at the late endosome membrane	0.423474	0.000588143
Regulation of gap junction activity	0.423096	0.000588143
c-src mediated regulation of Cx43 function and closure of gap junctions	0.423096	0.000588143
Alternative complement activation	-0.416456	0.000807941
Alpha-defensins	-0.412547	0.000949478
Activation and oligomerization of BAK protein	-0.408349	0.00110715
NOSIP mediated eNOS trafficking	-0.407255	0.00110715
Assembly of the primary cilium	0.407115	0.00110715
Downstream signaling of activated FGFR3	0.406737	0.00110715
YAP1- and WWTR1 (TAZ)-stimulated gene expression	0.404984	0.00116989
Synthesis of GDP-mannose	-0.40414	0.00117893
Small interfering RNA (siRNA) biogenesis	0.399003	0.0014857
Cellular response to heat stress	0.396458	0.0016341
SUMOylation	0.395473	0.00166134
Processing of Intronless Pre-mRNAs	0.393104	0.00181712
RHO GTPases activate KTN1	0.390346	0.00192425
Signaling by Robo receptor	0.389335	0.00192425
SUMO E3 ligases SUMOylate target proteins	0.389144	0.00192425
Beta oxidation of butanoyl-CoA to acetyl-CoA	-0.388459	0.00192425
Signaling by FGFR3 in disease	0.388185	0.00192425
Signaling by FGFR3 point mutants in cancer	0.388185	0.00192425
Formation of annular gap junctions	0.388076	0.00192425
Generic Transcription Pathway	0.387215	0.00196027
Mitotic Telophase/Cytokinesis	0.386319	0.00199883
Regulation of HSF1-mediated heat shock response	0.385266	0.00205443
Host Interactions with Influenza Factors	0.384831	0.00205443
FRS-mediated FGFR3 signaling	0.380456	0.00243596
Surfactant metabolism	-0.380409	0.00243596
AXIN missense mutants destabilize the destruction complex	0.376159	0.00262758
Truncations of AMER1 destabilize the destruction complex	0.376159	0.00262758
truncated APC mutants destabilize the destruction complex	0.376159	0.00262758
AMER1 mutants destabilize the destruction complex	0.376159	0.00262758
APC truncation mutants have impaired AXIN binding	0.376159	0.00262758
AXIN mutants destabilize the destruction complex, activating WNT signaling	0.376159	0.00262758
Transfer of LPS from LBP carrier to CD14	-0.375848	0.00262758
Cargo trafficking to the periciliary membrane	0.37521	0.00265246
Degradation of cysteine and homocysteine	-0.374863	0.00265246
BH3-only proteins associate with and inactivate anti-apoptotic BCL-2 members	-0.373386	0.00279368
Transport of Mature mRNA derived from an Intron-Containing Transcript	0.371722	0.00295947
EGFR Transactivation by Gastrin	0.370866	0.00295947
Cobalamin (Cbl, vitamin B12) transport and metabolism	-0.370726	0.00295947
Oxygen-dependent asparagine hydroxylation of Hypoxia-inducible Factor Alpha	0.370675	0.00295947
RAS signaling downstream of NF1 loss-of-function variants	0.369804	0.00303294
GDP-fucose biosynthesis	-0.369405	0.00303991
Signaling by FGFR3 fusions in cancer	0.36843	0.00312906
RNA Polymerase II Transcription Termination	0.367762	0.00312906
Cleavage of Growing Transcript in the Termination Region	0.367762	0.00312906
Translocation of ZAP-70 to Immunological synapse	-0.36461	0.00356221
TRKA activation by NGF	-0.363941	0.00361794
Transport of Mature Transcript to Cytoplasm	0.36192	0.00382963
NS1 Mediated Effects on Host Pathways	0.361826	0.00382963
The phototransduction cascade	0.361728	0.00382963
Inactivation, recovery and regulation of the phototransduction cascade	0.360686	0.00395792
Amine ligand-binding receptors	-0.358794	0.00421817
SUMOylation of DNA damage response and repair proteins	0.358654	0.00421817
SHC-mediated cascade:FGFR3	0.357913	0.00430168
Defective CD320 causes methylmalonic aciduria	-0.355959	0.004586
Phosphorylation of CD3 and TCR zeta chains	-0.355565	0.004586
Potassium transport channels	0.35543	0.004586
PD-1 signaling	-0.355295	0.004586
GRB2 events in ERBB2 signaling	0.354518	0.00467608
Establishment of Sister Chromatid Cohesion	0.354284	0.00467608
Galactose catabolism	-0.353522	0.00477643
PTK6 Expression	0.35289	0.00480457
Constitutive Signaling by EGFRvIII	0.352398	0.00480457
Signaling by EGFRvIII in Cancer	0.352398	0.00480457
Cytosolic iron-sulfur cluster assembly	-0.352294	0.00480457
Aflatoxin activation and detoxification	-0.350309	0.00517997
TFAP2 (AP-2) family regulates transcription of cell cycle factors	0.350029	0.00518335
Initial triggering of complement	-0.348235	0.00550363
HCN channels	-0.348126	0.00550363
Insulin-like Growth Factor-2 mRNA Binding Proteins (IGF2BPs/IMPs/VICKZs) bind RNA	0.34782	0.00550606
Synthesis of substrates in N-glycan biosythesis	-0.347603	0.00550606
Regulation of PAK-2p34 activity by PS-GAP/RHG10	0.346094	0.00581242
Circadian Clock	0.345363	0.00593345
Biosynthesis of the N-glycan precursor (dolichol lipid-linked oligosaccharide, LLO) and transfer to a nascent protein	-0.34399	0.00622608
Defensins	-0.339345	0.00743137
Toxicity of botulinum toxin type G (BoNT/G)	0.338246	0.00743137
Acyl chain remodelling of PS	-0.338158	0.00743137
Immunoregulatory interactions between a Lymphoid and a non-Lymphoid cell	-0.338018	0.00743137
Apoptotic cleavage of cell adhesion proteins	0.337521	0.00743137
Binding and entry of HIV virion	-0.337111	0.00743137
S33 mutants of beta-catenin aren't phosphorylated	0.336956	0.00743137
S37 mutants of beta-catenin aren't phosphorylated	0.336956	0.00743137
phosphorylation site mutants of CTNNB1 are not targeted to the proteasome by the destruction complex	0.336956	0.00743137
T41 mutants of beta-catenin aren't phosphorylated	0.336956	0.00743137
S45 mutants of beta-catenin aren't phosphorylated	0.336956	0.00743137
Misspliced GSK3beta mutants stabilize beta-catenin	0.336956	0.00743137
Regulation of gene expression in late stage (branching morphogenesis) pancreatic bud precursor cells	-0.334494	0.00815537
Signaling by TGF-beta Receptor Complex	0.333659	0.00836351
Downstream signaling of activated FGFR2	0.333016	0.00846991
SHC-related events triggered by IGF1R	0.332907	0.00846991
Stimulation of the cell death response by PAK-2p34	0.326646	0.0108333
Mitochondrial protein import	-0.324557	0.0116765
SHC1 events in ERBB2 signaling	0.324064	0.011729
Regulation of PLK1 Activity at G2/M Transition	0.324002	0.011729
SUMOylation of RNA binding proteins	0.321654	0.0127321
Class A/1 (Rhodopsin-like receptors)	-0.321301	0.0127321
Synthesis of dolichyl-phosphate-glucose	-0.321286	0.0127321
WNT5A-dependent internalization of FZD4	-0.316543	0.0152089
FCGR activation	-0.315952	0.0154319
PI-3K cascade:FGFR3	0.315677	0.0154675
Potassium Channels	-0.314858	0.0157713
Activation of NOXA and translocation to mitochondria	-0.314749	0.0157713
WNT5A-dependent internalization of FZD2, FZD5 and ROR2	-0.312858	0.016828
Transcription from mitochondrial promoters	-0.311945	0.0171492
Mitochondrial transcription initiation	-0.311945	0.0171492
Membrane Trafficking	0.311722	0.0171591
Chemokine receptors bind chemokines	-0.311437	0.017209
SUMOylation of DNA replication proteins	0.311235	0.017209
XAV939 inhibits tankyrase, stabilizing AXIN	0.309457	0.0182735
Complement cascade	-0.307933	0.0192116
DCC mediated attractive signaling	0.30701	0.0196642
Nef Mediated CD4 Down-regulation	-0.306912	0.0196642
TNFR2 non-canonical NF-kB pathway	-0.306098	0.0199335
Negative regulation of activity of TFAP2 (AP-2) family transcription factors	0.306005	0.0199335
Acyl chain remodeling of DAG and TAG	-0.305953	0.0199335
Transport of Mature mRNA Derived from an Intronless Transcript	0.30503	0.0204835
Generation of second messenger molecules	-0.304357	0.0208529
Sodium-coupled phosphate cotransporters	0.303185	0.0216259
Signaling by MET	0.302646	0.0219048
SUMOylation of chromatin organization proteins	-0.30234	0.0219966
Transport of Mature mRNAs Derived from Intronless Transcripts	0.301314	0.0226233
Vpr-mediated nuclear import of PICs	0.301081	0.0226233
Export of Viral Ribonucleoproteins from Nucleus	0.301008	0.0226233
Regulation of TP53 Activity	0.299691	0.0235826
Adenosine P1 receptors	-0.298883	0.0239126
Urea cycle	-0.298582	0.0239126
PIWI-interacting RNA (piRNA) biogenesis	-0.298504	0.0239126
SHC-mediated cascade:FGFR2	0.298354	0.0239126
snRNP Assembly	0.298198	0.0239126
Metabolism of non-coding RNA	0.298198	0.0239126
Rhesus glycoproteins mediate ammonium transport.	0.297255	0.0244986
MET promotes cell motility	0.297172	0.0244986
Intra-Golgi and retrograde Golgi-to-ER traffic	0.296503	0.0248864
NEP/NS2 Interacts with the Cellular Export Machinery	0.296255	0.0248864
FRS-mediated FGFR2 signaling	0.296203	0.0248864
HuR (ELAVL1) binds and stabilizes mRNA	0.294922	0.0259006
CD22 mediated BCR regulation	-0.294067	0.0265423
Peptide ligand-binding receptors	-0.292922	0.0274835
Transport of the SLBP Dependant Mature mRNA	0.291698	0.0285336
Apoptotic cleavage of cellular proteins	0.291361	0.0286985
Regulation of TP53 Activity through Phosphorylation	0.291009	0.0288811
Processing of Capped Intronless Pre-mRNA	0.290589	0.0291353
Regulation of gene expression in early pancreatic precursor cells	-0.290211	0.0293489
Pyrimidine metabolism	-0.289132	0.0301845
Transport of Ribonucleoproteins into the Host Nucleus	0.289075	0.0301845
Heme biosynthesis	-0.288339	0.0307937
Transport of the SLBP independent Mature mRNA	0.28778	0.0312198
Carnitine synthesis	0.287235	0.0316344
CLEC7A/inflammasome pathway	-0.286442	0.0323355
Voltage gated Potassium channels	-0.285545	0.0331707
Processing of Capped Intron-Containing Pre-mRNA	0.284825	0.0334864
Signaling by GPCR	-0.284815	0.0334864
Uptake and actions of bacterial toxins	0.284773	0.0334864
Activation of Rac	0.284203	0.033831
Anchoring fibril formation	0.284104	0.033831
Signaling by Activin	0.283985	0.033831
Acyl chain remodelling of PI	-0.283322	0.034424
Interactions of Rev with host cellular proteins	0.282674	0.0350077
Gene Expression	0.282466	0.0350627
Chylomicron-mediated lipid transport	-0.282212	0.0351505
RHO GTPases Activate NADPH Oxidases	-0.282072	0.0351505
5-Phosphoribose 1-diphosphate biosynthesis	-0.281362	0.035824
Regulation of TP53 Expression	-0.281129	0.0359156
Dopamine Neurotransmitter Release Cycle	0.280911	0.0359889
Adrenoceptors	-0.280528	0.0362693
Interactions of Vpr with host cellular proteins	0.280113	0.0365913
The NLRP3 inflammasome	-0.279906	0.0366101
Metabolism of porphyrins	-0.279673	0.0366101
Vesicle-mediated transport	0.279631	0.0366101
GPCR downstream signaling	-0.279097	0.0370885
Downstream signaling of activated FGFR4	0.278755	0.0373278
The role of Nef in HIV-1 replication and disease pathogenesis	-0.278117	0.0379491
RNF mutants show enhanced WNT signaling and proliferation	0.27719	0.038962
Nuclear import of Rev protein	0.276267	0.0399917
Signaling by Hippo	0.276028	0.0401086
Phospholipase C-mediated cascade; FGFR3	0.275246	0.0409719
Activation of PPARGC1A (PGC-1alpha) by phosphorylation	0.27507	0.0410066
Displacement of DNA glycosylase by APEX1	-0.274676	0.0413439
Nef-mediates down modulation of cell surface receptors by recruiting them to clathrin adapters	-0.27396	0.0419423
MET activates PTK2 signaling	0.27381	0.0419423
Beta-catenin phosphorylation cascade	0.2738	0.0419423
Lipoprotein metabolism	-0.273271	0.0424801
Mitotic Metaphase/Anaphase Transition	-0.273058	0.0425724
The retinoid cycle in cones (daylight vision)	-0.272727	0.0426342
Interleukin-17 signaling	-0.272721	0.0426342
Electron transport from NADPH to Ferredoxin	-0.270202	0.0460356
Regulation of Glucokinase by Glucokinase Regulatory Protein	0.270119	0.0460356
Regulation of beta-cell development	-0.269808	0.0462877
PI3K events in ERBB2 signaling	0.269565	0.0464383
Downstream signaling of activated FGFR1	0.268772	0.0474411
Formation of the active cofactor, UDP-glucuronate	0.268367	0.0476307
COPI-independent Golgi-to-ER retrograde traffic	0.268362	0.0476307
Developmental Biology	0.267066	0.0494644
Glutamate Neurotransmitter Release Cycle	0.266651	0.049905
