# Supplementary material for: Immune signatures correlate with L1 retrotransposition in gastrointestinal cancers
Source: HighWire-hosted journal article supplement (doi:10.1101/gr.231837.117), 2018-07-03
Supplement: Supplemental_Table_S8.xlsx [file Supplemental_Table_S8.xlsx]

## Sheet: Sheet3
Supplemental Table S8. Pathway genes significantly associated with somatic L1 insertion
Pathways	Key gene	FDR	known L1 inhibitors	L1 interacting genes	druggable genes	meta p- value	PAN-GI-TCGA		STAD		ESO		CRC
							coefficient	p value	coefficient	p value	coefficient	p value	coefficient	p value
Adaptive Immune System	PJA2	0.0479202	0	0	0	0.00717216	-0.24431	0.00943183	-0.294203	0.00596795	-0.0880543	0.637616	-0.0380736	0.770808
Adaptive Immune System	CTSS	0.0466454	0	0	1	0.00691959	-0.214947	0.0228499	-0.295407	0.00575683	-0.115925	0.534589	-0.115624	0.37489
Adaptive Immune System	CTSB	0.0439269	0	0	1	0.00645812	-0.20482	0.0302874	-0.166969	0.124402	-0.389922	0.0301259	-0.162197	0.21171
Adaptive Immune System	ASB16	0.0426274	0	0	0	0.00621062	-0.17176	0.070168	-0.356047	0.000766811	-0.141372	0.448092	0.00886972	0.945911
Adaptive Immune System	UBE2V2	0.0415343	0	0	0	0.00599634	0.198119	0.0362616	0.237564	0.0276318	-0.000706929	0.996989	0.29331	0.0217825
Adaptive Immune System	KLRD1	0.0410538	0	0	0	0.0058726	-0.192678	0.0418156	-0.25681	0.0169915	-0.263355	0.1523	-0.168013	0.195563
Adaptive Immune System	HLA-DPA1	0.0365302	0	0	0	0.00517713	-0.219503	0.0200516	-0.270197	0.0118686	-0.119964	0.520347	-0.189071	0.144472
Adaptive Immune System	SMURF2	0.0355578	0	0	0	0.00499222	0.208914	0.0270643	-0.100489	0.357265	-0.039487	0.832964	0.386111	0.00211656
Adaptive Immune System	KLRF1	0.0354589	0	0	0	0.00488965	-0.237202	0.0117956	-0.257025	0.0168964	-0.0999699	0.592595	-0.190968	0.140413
Adaptive Immune System	SIGLEC12	0.0354589	0	0	0	0.00493137	-0.188874	0.0461066	-0.159773	0.141711	na	na	-0.31277	0.0141202
Adaptive Immune System	TRAT1	0.032723	0	0	0	0.00438813	-0.198736	0.0356739	-0.318882	0.00276743	-0.146622	0.431235	-0.124897	0.337528
Adaptive Immune System	RNF130	0.032723	0	0	0	0.00443812	-0.255734	0.00649908	-0.204978	0.0583276	-0.162441	0.382617	-0.212238	0.100568
Adaptive Immune System	FBXO2	0.032723	0	0	0	0.0044642	0.0257137	0.787838	0.370838	0.000439935	-0.216702	0.241621	-0.175726	0.175532
Adaptive Immune System	PIK3R1	0.0310272	0	0	1	0.00410956	-0.192326	0.0421977	-0.349325	0.00097858	-0.0107038	0.954427	-0.125712	0.334362
Adaptive Immune System	KLC3	0.0298151	0	0	0	0.00390954	0.194243	0.0401498	0.294952	0.00583583	-0.139972	0.452645	0.203156	0.116345
Adaptive Immune System	KLRK1	0.0286218	0	0	0	0.00368627	-0.260132	0.00560652	-0.168467	0.121012	-0.314047	0.0853384	-0.167386	0.197259
Adaptive Immune System	UBE2L6	0.0286218	0	0	0	0.00371515	-0.23746	0.0117016	-0.152027	0.162309	-0.441685	0.0128622	-0.0937542	0.472338
Adaptive Immune System	RASGRP1	0.0281105	0	0	0	0.00357431	-0.150209	0.113921	-0.362883	0.000595106	-0.0914876	0.624504	-0.146761	0.259046
Adaptive Immune System	FCGR2B	0.0268256	0	0	1	0.00337541	-0.24573	0.00901291	-0.217616	0.0441411	-0.219328	0.235826	-0.207578	0.108442
Adaptive Immune System	HLA-G	0.0262928	0	0	0	0.00327354	-0.22296	0.0181303	-0.158702	0.144436	-0.411997	0.0212793	-0.175779	0.1754
Adaptive Immune System	NCF2	0.0258358	0	0	1	0.00318242	-0.197747	0.0366207	-0.181427	0.0945691	-0.483289	0.00588439	-0.0958988	0.46222
Adaptive Immune System	HLA-E	0.0254427	0	0	0	0.00310031	-0.216748	0.0217061	-0.0683671	0.531666	-0.51439	0.0030717	-0.147449	0.256794
Adaptive Immune System	TRIM69	0.0250529	0	0	0	0.00296488	-0.229288	0.0150229	-0.174004	0.109093	-0.385944	0.0320001	-0.180572	0.163738
Adaptive Immune System	CLEC2D	0.0250529	0	0	0	0.00299777	-0.25537	0.00657824	-0.21937	0.0424199	-0.308019	0.0918404	-0.124282	0.339933
Adaptive Immune System	LY96	0.0250529	0	0	1	0.00301601	-0.234699	0.0127438	-0.229372	0.0336369	-0.291831	0.111166	-0.172287	0.184272
Adaptive Immune System	CD207	0.0250529	0	0	0	0.00301962	-0.146626	0.122908	-0.230766	0.0325439	-0.502273	0.00398545	-0.0777034	0.551691
Adaptive Immune System	NCR3	0.0241193	0	0	0	0.00277932	-0.244575	0.00935246	-0.230975	0.032383	-0.19693	0.288306	-0.218696	0.0903981
Adaptive Immune System	LAT	0.0197339	0	0	0	0.00223388	-0.180911	0.0562762	-0.258157	0.016402	-0.237302	0.198652	-0.274299	0.032416
Adaptive Immune System	AP1M1	0.0197339	0	0	0	0.00224784	-0.239	0.0111533	-0.323708	0.00236323	-0.0252449	0.892768	-0.148111	0.254641
Adaptive Immune System	ITGA4	0.0190582	0	0	1	0.00212039	-0.213565	0.0237621	-0.325576	0.00222162	-0.198324	0.284839	-0.116921	0.369518
Adaptive Immune System	VCAM1	0.0183977	0	0	1	0.00202253	-0.178836	0.0592097	-0.369596	0.00046142	-0.0441326	0.813637	-0.15428	0.235164
Adaptive Immune System	HLA-DMB	0.0162408	0	0	0	0.0017639	-0.226242	0.0164557	-0.296536	0.00556505	-0.216096	0.242972	-0.167492	0.196972
Adaptive Immune System	SIGLEC5	0.0152737	0	0	0	0.00163863	-0.281644	0.00262672	-0.076132	0.485991	-0.268202	0.14462	-0.293707	0.0215965
Adaptive Immune System	CD22	0.0147891	0	0	1	0.00154908	-0.228612	0.0153311	-0.281432	0.00866515	na	na	-0.178374	0.169013
Adaptive Immune System	FCGR1B	0.0147891	0	0	0	0.00156297	-0.245572	0.00905877	-0.212714	0.0492602	na	na	-0.251185	0.0508595
Adaptive Immune System	SIGLEC9	0.0147891	0	0	0	0.00156706	-0.268826	0.00415664	-0.0824653	0.45034	-0.387964	0.031037	-0.237947	0.0648057
Adaptive Immune System	ITPR1	0.0105932	0	0	1	0.00106816	-0.196549	0.0377967	-0.327443	0.0020877	-0.295063	0.107084	-0.142498	0.273288
Adaptive Immune System	CD200R1	0.0105932	0	0	0	0.00107419	-0.281356	0.00265459	-0.210458	0.051776	-0.202161	0.275431	-0.240915	0.0614376
Adaptive Immune System	CD300C	0.0105932	0	0	0	0.00108037	-0.280604	0.00272853	-0.130809	0.229951	-0.310209	0.0894353	-0.261537	0.0417502
Adaptive Immune System	SIGLEC7	0.00892552	0	0	0	0.000874819	-0.285276	0.00229733	-0.220953	0.0409145	-0.20923	0.258633	-0.230613	0.0737652
Adaptive Immune System	CD226	0.00887608	0	0	0	0.000858217	-0.257701	0.00608537	-0.280674	0.00885463	-0.0723014	0.699111	-0.255971	0.0464644
Adaptive Immune System	PTPN22	0.00811233	0	0	0	0.000773626	-0.211374	0.0252719	-0.377067	0.000345366	-0.108048	0.562884	-0.131457	0.312561
Adaptive Immune System	TREM2	0.00782376	0	0	0	0.000735744	-0.298052	0.00141404	-0.22996	0.0331722	-0.172473	0.353508	-0.221028	0.0869311
Adaptive Immune System	SELL	0.00725153	0	0	1	0.000672327	-0.191599	0.0429973	-0.373758	0.000392984	-0.163789	0.378626	-0.165956	0.201168
Adaptive Immune System	SH2D1A	0.00721991	0	0	0	0.000659833	-0.195347	0.0390087	-0.387164	0.00023088	-0.114219	0.540656	-0.147032	0.258158
Adaptive Immune System	SIGLEC1	0.00715321	0	0	0	0.000644263	-0.285764	0.00225607	-0.197308	0.0686176	-0.232657	0.207844	-0.266462	0.0379149
Adaptive Immune System	CD300LB	0.0063193	0	0	0	0.000560785	-0.264428	0.00484173	-0.250885	0.0198082	-0.304151	0.0962073	-0.206058	0.111111
Adaptive Immune System	CD300LF	0.00603617	0	0	0	0.000527665	-0.217903	0.0209987	-0.320342	0.00263904	-0.221291	0.231554	-0.230401	0.0740379
Adaptive Immune System	LILRB1	0.00602763	0	0	0	0.000518935	-0.257617	0.00610257	-0.304139	0.00441372	-0.232455	0.20825	-0.179674	0.165878
Adaptive Immune System	SKP1	0.00513319	0	0	0	0.000429836	-0.315175	0.000712378	-0.270529	0.0117609	na	na	-0.0716991	0.58293
Adaptive Immune System	FCGR1A	0.00513319	0	0	1	0.000435132	-0.261394	0.00537139	-0.223911	0.038221	-0.363527	0.0444075	-0.224523	0.0819314
Adaptive Immune System	NCF4	0.0046982	0	0	0	0.000380041	-0.176205	0.0631076	-0.404459	0.00011232	-0.271231	0.139965	-0.0617703	0.636275
Adaptive Immune System	SLAMF7	0.0046982	0	0	1	0.000381781	-0.228698	0.0152918	-0.359973	0.000663391	-0.0910836	0.626041	-0.212608	0.0999617
Adaptive Immune System	PIK3CD	0.0046982	0	0	1	0.000385813	-0.265809	0.0046164	-0.273184	0.0109297	-0.356898	0.0487333	-0.145993	0.261574
Adaptive Immune System	GRAP2	0.00468994	0	0	0	0.000366499	-0.263401	0.00501562	-0.342613	0.00124184	0.0304959	0.870634	-0.205963	0.11128
Adaptive Immune System	LCP2	0.00465322	0	0	0	0.000357466	-0.258643	0.00589564	-0.296365	0.00559369	-0.308998	0.0907598	-0.168048	0.195468
Adaptive Immune System	HLA-DQB2	0.00447776	0	0	0	0.000338056	-0.283557	0.00244834	-0.299987	0.00501308	-0.126225	0.498646	-0.219492	0.0892024
Adaptive Immune System	SIGLEC10	0.00432224	0	0	0	0.00032059	-0.212624	0.0244011	-0.36348	0.000581914	-0.255882	0.16471	-0.159814	0.218589
Adaptive Immune System	HLA-DOA	0.00426465	0	0	0	0.00031067	-0.207044	0.0284979	-0.407282	9.94772e-05	-0.13087	0.482844	-0.119437	0.359237
Adaptive Immune System	LILRB2	0.00398384	0	0	0	0.000284937	-0.257946	0.00603556	-0.272312	0.011197	-0.212259	0.251644	-0.285022	0.0259843
Adaptive Immune System	PSMB10	0.00387782	0	0	1	0.000272218	-0.261296	0.0053894	-0.274891	0.0104228	-0.308594	0.0912045	-0.224814	0.0815252
Adaptive Immune System	LAIR1	0.00380933	0	0	0	0.000262364	-0.323809	0.000496296	-0.0939372	0.389627	-0.316066	0.0832407	-0.287246	0.0247947
Adaptive Immune System	PTPRC	0.00343268	0	0	1	0.000231876	-0.216414	0.0219142	-0.383106	0.000271863	-0.244169	0.185587	-0.132146	0.310011
Adaptive Immune System	BLK	0.00341498	0	0	1	0.000226157	-0.168931	0.0749844	-0.42376	4.79094e-05	0.0335286	0.857892	-0.207917	0.107854
Adaptive Immune System	CD79A	0.00267942	0	0	1	0.000173896	-0.147779	0.119958	-0.459219	8.6942e-06	0.0280723	0.880838	-0.145834	0.262099
Adaptive Immune System	UBA7	0.00261914	0	0	0	0.000166515	-0.211379	0.0252689	-0.394132	0.000173525	na	na	-0.117371	0.367665
Adaptive Immune System	CD36	0.00252861	0	0	1	0.00015741	-0.248323	0.00829034	-0.387344	0.0002292	-0.133091	0.47538	-0.154015	0.235978
Adaptive Immune System	HLA-DQA1	0.00246859	0	0	1	0.000148656	-0.248918	0.00813199	-0.313971	0.00324138	-0.319298	0.0799668	-0.216156	0.0942971
Adaptive Immune System	CD1C	0.00246859	0	0	0	0.000150404	-0.18329	0.0530613	-0.398152	0.000146744	-0.291154	0.112037	-0.155604	0.231122
Adaptive Immune System	CYBB	0.00211211	0	0	0	0.000118131	-0.247065	0.00863425	-0.349667	0.000966662	-0.338888	0.0621922	-0.137865	0.289349
Adaptive Immune System	CD40LG	0.00211211	0	0	1	0.000121364	-0.241576	0.0102866	-0.322267	0.00247799	0.247955	0.178646	-0.27181	0.0340851
Adaptive Immune System	VAV1	0.00211211	0	0	1	0.00012309	-0.227008	0.0160848	-0.366372	0.000521745	-0.264567	0.150353	-0.198496	0.125144
Adaptive Immune System	ITGB7	0.00208429	0	0	1	0.000113187	-0.246616	0.00876009	-0.399565	0.000138278	-0.04999	0.789422	-0.186952	0.149107
Adaptive Immune System	HLA-DQA2	0.00180519	0	0	0	9.5639e-05	-0.321413	0.000549246	-0.173843	0.109427	na	na	-0.31277	0.0141202
Adaptive Immune System	FBXL5	0.00137174	0	0	0	7.08581e-05	-0.299702	0.00132599	-0.360873	0.000641533	-0.0319096	0.86469	-0.206747	0.109896
Adaptive Immune System	CD40	0.00129183	0	0	1	6.3427e-05	-0.280147	0.00277448	-0.319916	0.00267599	-0.355448	0.0497225	-0.169504	0.191568
Adaptive Immune System	C3	0.00129183	0	0	1	6.50194e-05	-0.302104	0.00120668	-0.268832	0.0123207	na	na	-0.268226	0.036614
Adaptive Immune System	TLR1	0.00106958	0	0	0	5.01333e-05	-0.270131	0.00397076	-0.361091	0.00063634	-0.2577	0.161627	-0.195796	0.130469
Adaptive Immune System	CD86	0.00106958	0	0	1	5.09998e-05	-0.261385	0.00537296	-0.326505	0.00215406	-0.392407	0.029001	-0.181286	0.162048
Adaptive Immune System	PLCG2	0.00103666	0	0	1	4.66838e-05	-0.256919	0.00624695	-0.401708	0.000126297	-0.0838131	0.653962	-0.215839	0.0947939
Adaptive Immune System	CD14	0.00100021	0	0	1	4.18995e-05	-0.323766	0.000497199	-0.215872	0.0459099	-0.350601	0.0531464	-0.269904	0.0354115
Adaptive Immune System	CD33	0.00100021	0	0	1	4.36263e-05	-0.237986	0.0115117	-0.394151	0.000173389	-0.358817	0.047448	-0.0929599	0.476115
Adaptive Immune System	TYROBP	0.00100021	0	0	0	4.37179e-05	-0.315179	0.000712252	-0.214611	0.0472247	-0.360295	0.0464762	-0.279886	0.0289166
Adaptive Immune System	SIGLEC11	0.000704332	0	0	0	2.79867e-05	-0.276997	0.00310993	-0.234066	0.0300751	-0.398102	0.0265519	-0.324701	0.0106763
Adaptive Immune System	ITGB2	0.000647543	0	0	1	2.48725e-05	-0.300832	0.00126862	-0.296508	0.00556958	-0.345956	0.0566	-0.24446	0.0576023
Adaptive Immune System	PRKCQ	0.000421259	0	0	1	1.47931e-05	-0.266763	0.00446629	-0.362428	0.00060534	-0.336262	0.0643762	-0.232466	0.0714129
Adaptive Immune System	RASGRP2	0.000421259	0	0	0	1.55778e-05	-0.215662	0.0223899	-0.461362	7.79366e-06	0.0563523	0.763337	-0.213075	0.0992027
Adaptive Immune System	CD19	0.000421259	0	0	1	1.56229e-05	-0.182697	0.0538484	-0.473696	4.09321e-06	0.0537212	0.774095	-0.227606	0.0777116
Adaptive Immune System	LILRA1	0.000312002	0	0	0	1.02643e-05	-0.310257	0.000871056	-0.213445	0.0484681	-0.455666	0.00999355	-0.299272	0.0191286
Adaptive Immune System	HLA-DPB1	0.000312002	0	0	0	1.03312e-05	-0.246881	0.00868559	-0.438617	2.3982e-05	-0.196506	0.289366	-0.193598	0.134927
Adaptive Immune System	ITK	0.000306184	0	0	1	9.32745e-06	-0.212966	0.0241671	-0.472388	4.38781e-06	-0.132889	0.476056	-0.189838	0.142819
Adaptive Immune System	CD300A	0.00030177	0	0	0	7.60859e-06	-0.306331	0.00102027	-0.263438	0.0142568	-0.413411	0.0207951	-0.300167	0.0187552
Adaptive Immune System	ITGAL	0.00030177	0	0	1	8.19408e-06	-0.260996	0.00544455	-0.428463	3.86195e-05	-0.200465	0.279565	-0.209405	0.105301
Adaptive Immune System	CD8A	0.00030177	0	0	0	8.53425e-06	-0.248049	0.00836416	-0.391421	0.000194066	-0.352015	0.0521291	-0.228336	0.0767392
Adaptive Immune System	FYB	0.00030177	0	0	0	8.7933e-06	-0.289983	0.00192617	-0.396616	0.00015649	-0.344341	0.0578419	-0.113029	0.385773
Adaptive Immune System	CD79B	0.000284982	0	0	1	6.79427e-06	-0.189734	0.0451059	-0.498072	1.06257e-06	-0.0329194	0.860449	-0.200959	0.120434
Adaptive Immune System	CD3E	0.000229718	0	0	1	5.17245e-06	-0.279809	0.00280885	-0.417617	6.31909e-05	-0.20822	0.26099	-0.227488	0.0778698
Adaptive Immune System	ASB2	0.00016979	0	0	0	3.5982e-06	-0.307931	0.000956846	-0.351127	0.000917152	-0.108452	0.561416	-0.356589	0.0047903
Adaptive Immune System	NCF1	0.000154552	0	0	1	2.72756e-06	-0.273896	0.00347547	-0.401404	0.000127933	na	na	-0.272155	0.0338501
Adaptive Immune System	CD3D	0.000154552	0	0	1	2.92435e-06	-0.24858	0.00822166	-0.485586	2.14791e-06	-0.0931126	0.618336	-0.178083	0.169721
Adaptive Immune System	CD247	0.000154552	0	0	1	3.07057e-06	-0.250569	0.00770618	-0.483139	2.45751e-06	-0.0605878	0.74611	-0.191718	0.138831
Adaptive Immune System	WAS	0.000128756	0	0	0	2.04646e-06	-0.288638	0.00202627	-0.435213	2.81827e-05	-0.180469	0.331287	-0.238056	0.0646794
Adaptive Immune System	CD3G	0.000116446	0	0	1	1.69657e-06	-0.285846	0.00224926	-0.43236	3.2224e-05	-0.11855	0.525311	-0.285261	0.0258546
Adaptive Immune System	SLAMF6	0.000116408	0	0	1	1.54182e-06	-0.200841	0.0337255	-0.518826	3.09552e-07	-0.0585682	0.754309	-0.205619	0.111892
Adaptive Immune System	KLRB1	8.35269e-05	0	0	0	4.67402e-07	-0.238793	0.0112256	-0.519698	2.93383e-07	-0.0898719	0.63066	-0.208322	0.107154
Adaptive Immune System	CD4	8.35269e-05	0	0	1	5.94376e-07	-0.313716	0.000756445	-0.441091	2.13036e-05	-0.15773	0.396751	-0.256639	0.0458767
Adaptive Immune System	CLEC2B	8.35269e-05	0	0	0	6.60576e-07	-0.303161	0.0011574	-0.411653	8.22544e-05	-0.471575	0.00740466	-0.0942838	0.469829
Adaptive Immune System	EVL	8.35269e-05	0	0	0	7.41543e-07	-0.278097	0.00298883	-0.466737	5.90453e-06	-0.3092	0.090538	-0.153751	0.236794
Adaptive Immune System	HCST	8.35269e-05	0	0	0	7.85565e-07	-0.301586	0.00123156	-0.37628	0.000356183	-0.372009	0.0393256	-0.289894	0.0234386
Adaptive Immune System	BTK	8.35269e-05	0	0	1	9.56104e-07	-0.259905	0.00564973	-0.497579	1.09309e-06	-0.139352	0.454669	-0.173714	0.180608
Adaptive Immune System	CD96	8.35269e-05	0	0	0	9.95685e-07	-0.253684	0.00695644	-0.489662	1.71215e-06	-0.0713998	0.702692	-0.239085	0.0634968
Adaptive Immune System	PRKCB	5.51342e-06	0	0	1	1.46051e-08	-0.298168	0.00140771	-0.515868	3.70902e-07	na	na	-0.218274	0.0910368
Adaptive Immune System	CD1D	4.52189e-06	0	0	0	5.98926e-09	-0.298159	0.00140818	-0.488401	1.83712e-06	-0.351849	0.0522481	-0.320263	0.0118613
Alternative complement activation	CFD	0.0424988	0	0	1	0.033999	-0.131983	0.165387	-0.268595	0.0124007	-0.128042	0.492432	-0.152612	0.240326
Alternative complement activation	CFP	0.00467037	0	0	0	0.00280222	-0.22222	0.0185277	-0.155677	0.152342	-0.0480663	0.797354	-0.367789	0.00354491
Alternative complement activation	C3	0.000162549	0	0	1	6.50194e-05	-0.302104	0.00120668	-0.268832	0.0123207	na	na	-0.268226	0.036614
Alternative complement activation	GZMM	5.74904e-06	0	0	0	1.14981e-06	-0.327471	0.000424368	-0.348937	0.000992317	-0.146738	0.430868	-0.368689	0.00345856
Antigen activates B Cell Receptor (BCR) leading to generation of second messengers	PTPN6	0.0458317	0	0	1	0.0165504	-0.187205	0.0481008	-0.139066	0.201605	-0.335656	0.0648886	-0.192009	0.138221
Antigen activates B Cell Receptor (BCR) leading to generation of second messengers	SRMS	0.0349637	0	0	1	0.0116546	0.185167	0.0506333	0.30558	0.00422115	0.156433	0.400694	0.063862	0.624871
Antigen activates B Cell Receptor (BCR) leading to generation of second messengers	PIK3R1	0.0134495	0	0	1	0.00410956	-0.192326	0.0421977	-0.349325	0.00097858	-0.0107038	0.954427	-0.125712	0.334362
Antigen activates B Cell Receptor (BCR) leading to generation of second messengers	CD22	0.00557669	0	0	1	0.00154908	-0.228612	0.0153311	-0.281432	0.00866515	na	na	-0.178374	0.169013
Antigen activates B Cell Receptor (BCR) leading to generation of second messengers	ITPR1	0.00427265	0	0	1	0.00106816	-0.196549	0.0377967	-0.327443	0.0020877	-0.295063	0.107084	-0.142498	0.273288
Antigen activates B Cell Receptor (BCR) leading to generation of second messengers	PIK3CD	0.00173616	0	0	1	0.000385813	-0.265809	0.0046164	-0.273184	0.0109297	-0.356898	0.0487333	-0.145993	0.261574
Antigen activates B Cell Receptor (BCR) leading to generation of second messengers	BLK	0.00116309	0	0	1	0.000226157	-0.168931	0.0749844	-0.42376	4.79094e-05	0.0335286	0.857892	-0.207917	0.107854
Antigen activates B Cell Receptor (BCR) leading to generation of second messengers	CD79A	0.00104338	0	0	1	0.000173896	-0.147779	0.119958	-0.459219	8.6942e-06	0.0280723	0.880838	-0.145834	0.262099
Antigen activates B Cell Receptor (BCR) leading to generation of second messengers	VAV1	0.000886247	0	0	1	0.00012309	-0.227008	0.0160848	-0.366372	0.000521745	-0.264567	0.150353	-0.198496	0.125144
Antigen activates B Cell Receptor (BCR) leading to generation of second messengers	PLCG2	0.000420154	0	0	1	4.66838e-05	-0.256919	0.00624695	-0.401708	0.000126297	-0.0838131	0.653962	-0.215839	0.0947939
Antigen activates B Cell Receptor (BCR) leading to generation of second messengers	CD19	0.000187474	0	0	1	1.56229e-05	-0.182697	0.0538484	-0.473696	4.09321e-06	0.0537212	0.774095	-0.227606	0.0777116
Antigen activates B Cell Receptor (BCR) leading to generation of second messengers	CD79B	0.000122297	0	0	1	6.79427e-06	-0.189734	0.0451059	-0.498072	1.06257e-06	-0.0329194	0.860449	-0.200959	0.120434
Antigen activates B Cell Receptor (BCR) leading to generation of second messengers	BTK	3.44197e-05	0	0	1	9.56104e-07	-0.259905	0.00564973	-0.497579	1.09309e-06	-0.139352	0.454669	-0.173714	0.180608
Cam-PDE 1 activation	PDE1A	0.00481072	0	0	1	0.000801787	-0.220547	0.0194538	-0.362457	0.000604696	-0.0723014	0.699111	-0.168101	0.195325
CD22 mediated BCR regulation	PTPN6	0.0206879	0	0	1	0.0165504	-0.187205	0.0481008	-0.139066	0.201605	-0.335656	0.0648886	-0.192009	0.138221
CD22 mediated BCR regulation	CD22	0.0025818	0	0	1	0.00154908	-0.228612	0.0153311	-0.281432	0.00866515	na	na	-0.178374	0.169013
CD22 mediated BCR regulation	CD79A	0.000434741	0	0	1	0.000173896	-0.147779	0.119958	-0.459219	8.6942e-06	0.0280723	0.880838	-0.145834	0.262099
CD22 mediated BCR regulation	CD79B	3.39714e-05	0	0	1	6.79427e-06	-0.189734	0.0451059	-0.498072	1.06257e-06	-0.0329194	0.860449	-0.200959	0.120434
CD28 dependent Vav1 pathway	VAV1	0.000738539	0	0	1	0.00012309	-0.227008	0.0160848	-0.366372	0.000521745	-0.264567	0.150353	-0.198496	0.125144
CD28 dependent Vav1 pathway	CD86	0.000611998	0	0	1	5.09998e-05	-0.261385	0.00537296	-0.326505	0.00215406	-0.392407	0.029001	-0.181286	0.162048
Classical antibody-mediated complement activation	CRP	0.0135883	0	0	1	0.0135883	-0.269234	0.00409764	0.0176438	0.871904	-0.249951	0.175061	-0.209157	0.105722
Classical antibody-mediated complement activation	C1S	0.000473898	0	0	1	0.000394915	-0.243737	0.00960571	-0.313241	0.00331772	-0.311219	0.0883429	-0.15428	0.235164
Classical antibody-mediated complement activation	C1R	0.00041359	0	0	1	0.000275727	-0.267491	0.0043548	-0.327842	0.0020601	na	na	-0.128571	0.323395
Classical antibody-mediated complement activation	C1QB	3.11936e-05	0	0	1	1.55968e-05	-0.331001	0.00036425	-0.2318	0.0317529	-0.36797	0.0416839	-0.282401	0.0274478
Classical antibody-mediated complement activation	C1QC	2.38642e-05	0	0	0	7.95472e-06	-0.348949	0.000162764	-0.212032	0.0500104	-0.350399	0.053293	-0.313829	0.01378
Classical antibody-mediated complement activation	C1QA	5.60063e-06	0	0	1	9.33439e-07	-0.318687	0.000615758	-0.362656	0.000600203	-0.406746	0.0231598	-0.244433	0.0576302
Complement cascade	CRP	0.0407649	0	0	1	0.0135883	-0.269234	0.00409764	0.0176438	0.871904	-0.249951	0.175061	-0.209157	0.105722
Complement cascade	CD59	0.0235496	0	0	1	0.0070635	0.0198522	0.835417	-0.285339	0.00774463	-0.0854288	0.647716	0.345019	0.00646726
Complement cascade	FCN1	0.0235496	0	0	0	0.00724604	-0.142324	0.134407	-0.281565	0.00863236	-0.201879	0.276117	-0.220604	0.0875531
Complement cascade	CFP	0.0109287	0	0	0	0.00280222	-0.22222	0.0185277	-0.155677	0.152342	-0.0480663	0.797354	-0.367789	0.00354491
Complement cascade	CFH	0.0080476	0	0	0	0.00185714	-0.225181	0.0169819	-0.32422	0.00232363	-0.232253	0.208657	-0.0743997	0.56878
Complement cascade	C1S	0.00192521	0	0	1	0.000394915	-0.243737	0.00960571	-0.313241	0.00331772	-0.311219	0.0883429	-0.15428	0.235164
Complement cascade	C1R	0.00153619	0	0	1	0.000275727	-0.267491	0.0043548	-0.327842	0.0020601	na	na	-0.128571	0.323395
Complement cascade	C3	0.000422626	0	0	1	6.50194e-05	-0.302104	0.00120668	-0.268832	0.0123207	na	na	-0.268226	0.036614
Complement cascade	C1QB	0.000121655	0	0	1	1.55968e-05	-0.331001	0.00036425	-0.2318	0.0317529	-0.36797	0.0416839	-0.282401	0.0274478
Complement cascade	C3AR1	0.000104099	0	0	1	1.06769e-05	-0.30014	0.00130347	-0.345761	0.00111129	-0.292841	0.109878	-0.248855	0.0531186
Complement cascade	C1QC	0.000103411	0	0	0	7.95472e-06	-0.348949	0.000162764	-0.212032	0.0500104	-0.350399	0.053293	-0.313829	0.01378
Complement cascade	C1QA	2.24212e-05	0	0	1	9.33439e-07	-0.318687	0.000615758	-0.362656	0.000600203	-0.406746	0.0231598	-0.244433	0.0576302
Complement cascade	GZMM	2.24212e-05	0	0	0	1.14981e-06	-0.327471	0.000424368	-0.348937	0.000992317	-0.146738	0.430868	-0.368689	0.00345856
Costimulation by the CD28 family	TRIB3	0.0480125	0	0	0	0.0129558	0.13882	0.144365	0.369823	0.000457414	-0.0125215	0.946698	-0.00158861	0.990305
Costimulation by the CD28 family	HLA-DRA	0.0408386	0	0	1	0.0103717	-0.21567	0.0223847	-0.244627	0.0232081	-0.166414	0.370925	-0.153777	0.236713
Costimulation by the CD28 family	PDCD1LG2	0.0363974	0	0	1	0.00866605	-0.222162	0.0185592	-0.261816	0.0148879	0.0464506	0.804032	-0.181826	0.160782
Costimulation by the CD28 family	HLA-DPA1	0.0232971	0	0	0	0.00517713	-0.219503	0.0200516	-0.270197	0.0118686	-0.119964	0.520347	-0.189071	0.144472
Costimulation by the CD28 family	PIK3R1	0.0199155	0	0	1	0.00410956	-0.192326	0.0421977	-0.349325	0.00097858	-0.0107038	0.954427	-0.125712	0.334362
Costimulation by the CD28 family	HLA-DQB2	0.00192412	0	0	0	0.000338056	-0.283557	0.00244834	-0.299987	0.00501308	-0.126225	0.498646	-0.219492	0.0892024
Costimulation by the CD28 family	GRAP2	0.00192412	0	0	0	0.000366499	-0.263401	0.00501562	-0.342613	0.00124184	0.0304959	0.870634	-0.205963	0.11128
Costimulation by the CD28 family	HLA-DQA1	0.00093653	0	0	1	0.000148656	-0.248918	0.00813199	-0.313971	0.00324138	-0.319298	0.0799668	-0.216156	0.0942971
Costimulation by the CD28 family	VAV1	0.000861629	0	0	1	0.00012309	-0.227008	0.0160848	-0.366372	0.000521745	-0.264567	0.150353	-0.198496	0.125144
Costimulation by the CD28 family	HLA-DQA2	0.000753157	0	0	0	9.5639e-05	-0.321413	0.000549246	-0.173843	0.109427	na	na	-0.31277	0.0141202
Costimulation by the CD28 family	CD86	0.000458999	0	0	1	5.09998e-05	-0.261385	0.00537296	-0.326505	0.00215406	-0.392407	0.029001	-0.181286	0.162048
Costimulation by the CD28 family	HLA-DPB1	0.000108477	0	0	0	1.03312e-05	-0.246881	0.00868559	-0.438617	2.3982e-05	-0.196506	0.289366	-0.193598	0.134927
Costimulation by the CD28 family	CD3E	6.51729e-05	0	0	1	5.17245e-06	-0.279809	0.00280885	-0.417617	6.31909e-05	-0.20822	0.26099	-0.227488	0.0778698
Costimulation by the CD28 family	CD3G	4.83614e-05	0	0	1	1.69657e-06	-0.285846	0.00224926	-0.43236	3.2224e-05	-0.11855	0.525311	-0.285261	0.0258546
Costimulation by the CD28 family	CD3D	4.83614e-05	0	0	1	2.92435e-06	-0.24858	0.00822166	-0.485586	2.14791e-06	-0.0931126	0.618336	-0.178083	0.169721
Costimulation by the CD28 family	CD247	4.83614e-05	0	0	1	3.07057e-06	-0.250569	0.00770618	-0.483139	2.45751e-06	-0.0605878	0.74611	-0.191718	0.138831
Costimulation by the CD28 family	CD4	3.74457e-05	0	0	1	5.94376e-07	-0.313716	0.000756445	-0.441091	2.13036e-05	-0.15773	0.396751	-0.256639	0.0458767
Creation of C4 and C2 activators	CRP	0.0232942	0	0	1	0.0135883	-0.269234	0.00409764	0.0176438	0.871904	-0.249951	0.175061	-0.209157	0.105722
Creation of C4 and C2 activators	FCN1	0.0144921	0	0	0	0.00724604	-0.142324	0.134407	-0.281565	0.00863236	-0.201879	0.276117	-0.220604	0.0875531
Creation of C4 and C2 activators	C1S	0.000947795	0	0	1	0.000394915	-0.243737	0.00960571	-0.313241	0.00331772	-0.311219	0.0883429	-0.15428	0.235164
Creation of C4 and C2 activators	C1R	0.000827181	0	0	1	0.000275727	-0.267491	0.0043548	-0.327842	0.0020601	na	na	-0.128571	0.323395
Creation of C4 and C2 activators	C1QB	6.23873e-05	0	0	1	1.55968e-05	-0.331001	0.00036425	-0.2318	0.0317529	-0.36797	0.0416839	-0.282401	0.0274478
Creation of C4 and C2 activators	C1QC	4.77283e-05	0	0	0	7.95472e-06	-0.348949	0.000162764	-0.212032	0.0500104	-0.350399	0.053293	-0.313829	0.01378
Creation of C4 and C2 activators	C1QA	1.12013e-05	0	0	1	9.33439e-07	-0.318687	0.000615758	-0.362656	0.000600203	-0.406746	0.0231598	-0.244433	0.0576302
Cross-presentation of particulate exogenous antigens (phagosomes)	NCF2	0.00509187	0	0	1	0.00318242	-0.197747	0.0366207	-0.181427	0.0945691	-0.483289	0.00588439	-0.0958988	0.46222
Cross-presentation of particulate exogenous antigens (phagosomes)	NCF4	0.000760082	0	0	0	0.000380041	-0.176205	0.0631076	-0.404459	0.00011232	-0.271231	0.139965	-0.0617703	0.636275
Cross-presentation of particulate exogenous antigens (phagosomes)	CYBB	0.00041976	0	0	0	0.000118131	-0.247065	0.00863425	-0.349667	0.000966662	-0.338888	0.0621922	-0.137865	0.289349
Cross-presentation of particulate exogenous antigens (phagosomes)	CD36	0.00041976	0	0	1	0.00015741	-0.248323	0.00829034	-0.387344	0.0002292	-0.133091	0.47538	-0.154015	0.235978
Cross-presentation of particulate exogenous antigens (phagosomes)	NCF1	2.18205e-05	0	0	1	2.72756e-06	-0.273896	0.00347547	-0.401404	0.000127933	na	na	-0.272155	0.0338501
Cytokine Signaling in Immune system	TEK	0.0486386	0	0	1	0.0048559	-0.144069	0.129646	-0.349411	0.000975588	0.0337272	0.857059	-0.18584	0.151584
Cytokine Signaling in Immune system	GH2	0.0461947	0	0	0	0.0045363	0.282466	0.00254864	0.187474	0.0839021	-0.0705463	0.706089	0.212926	0.0994447
Cytokine Signaling in Immune system	PIK3R1	0.0425583	0	0	1	0.00410956	-0.192326	0.0421977	-0.349325	0.00097858	-0.0107038	0.954427	-0.125712	0.334362
Cytokine Signaling in Immune system	UBE2L6	0.0391372	0	0	0	0.00371515	-0.23746	0.0117016	-0.152027	0.162309	-0.441685	0.0128622	-0.0937542	0.472338
Cytokine Signaling in Immune system	CIITA	0.0383141	0	0	0	0.00355231	-0.195043	0.0393199	-0.337275	0.00149533	-0.168872	0.3638	-0.0862613	0.508601
Cytokine Signaling in Immune system	RASGRP1	0.0383141	0	0	0	0.00357431	-0.150209	0.113921	-0.362883	0.000595106	-0.0914876	0.624504	-0.146761	0.259046
Cytokine Signaling in Immune system	IL34	0.0382628	0	0	0	0.00344428	-0.176817	0.0621835	-0.267941	0.0126238	na	na	-0.229262	0.0755176
Cytokine Signaling in Immune system	HLA-G	0.0373417	0	0	0	0.00327354	-0.22296	0.0181303	-0.158702	0.144436	-0.411997	0.0212793	-0.175779	0.1754
Cytokine Signaling in Immune system	HIST1H3B	0.0373417	0	0	0	0.00328842	0.200874	0.0336956	0.308137	0.00389786	0.15874	0.393696	0.17004	0.190146
Cytokine Signaling in Immune system	OAS2	0.0373417	0	0	0	0.00330025	-0.196699	0.037648	-0.22868	0.034191	-0.469555	0.00769788	0.000503059	0.99693
Cytokine Signaling in Immune system	TNFSF18	0.0371429	0	0	0	0.00309476	-0.252429	0.00725033	-0.14363	0.18706	0.145815	0.433806	-0.30887	0.015436
Cytokine Signaling in Immune system	HLA-E	0.0371429	0	0	0	0.00310031	-0.216748	0.0217061	-0.0683671	0.531666	-0.51439	0.0030717	-0.147449	0.256794
Cytokine Signaling in Immune system	IL1RL2	0.0338285	0	0	0	0.00271293	0.203296	0.0315667	0.339399	0.00138935	0.220943	0.232306	0.0415156	0.750731
Cytokine Signaling in Immune system	TNFRSF1B	0.0292796	0	0	1	0.0023002	-0.200879	0.0336907	-0.316398	0.00299876	0.0450369	0.809887	-0.229315	0.0754482
Cytokine Signaling in Immune system	LAT	0.0290405	0	0	0	0.00223388	-0.180911	0.0562762	-0.258157	0.016402	-0.237302	0.198652	-0.274299	0.032416
Cytokine Signaling in Immune system	VCAM1	0.0268645	0	0	1	0.00202253	-0.178836	0.0592097	-0.369596	0.00046142	-0.0441326	0.813637	-0.15428	0.235164
Cytokine Signaling in Immune system	CSF2RA	0.0247114	0	0	1	0.00181999	-0.243253	0.00975452	-0.2223	0.0396696	-0.278502	0.129239	-0.218142	0.0912379
Cytokine Signaling in Immune system	FCGR1B	0.0217039	0	0	0	0.00156297	-0.245572	0.00905877	-0.212714	0.0492602	na	na	-0.251185	0.0508595
Cytokine Signaling in Immune system	IL17C	0.0208006	0	0	1	0.00146387	0.2366	0.012018	0.274511	0.0105336	-0.175705	0.344422	0.226549	0.0791392
Cytokine Signaling in Immune system	CNTF	0.0206796	0	0	0	0.00142151	0.262098	0.00524407	0.027125	0.804203	0.377866	0.0360978	0.293207	0.0218307
Cytokine Signaling in Immune system	XAF1	0.0179943	0	0	0	0.00120748	-0.276921	0.00311852	-0.283509	0.00816454	na	na	-0.0585931	0.65376
Cytokine Signaling in Immune system	IL12RB1	0.0167757	0	0	0	0.00109825	-0.238123	0.0114627	-0.303931	0.00444223	-0.175907	0.343859	-0.192777	0.136621
Cytokine Signaling in Immune system	SAMHD1	0.016042	1	0	0	0.00102396	-0.228304	0.0154734	-0.330762	0.00186757	-0.0874484	0.639941	-0.202071	0.118351
Cytokine Signaling in Immune system	TNFRSF17	0.0152415	0	0	1	0.000947914	-0.110603	0.245662	-0.43289	3.14334e-05	0.0977483	0.600884	-0.103405	0.427752
Cytokine Signaling in Immune system	GBP1	0.010813	0	0	0	0.000654798	-0.243827	0.00957827	-0.313317	0.00330971	-0.260527	0.156914	-0.149461	0.250287
Cytokine Signaling in Immune system	HAVCR2	0.0100611	0	0	1	0.000592796	-0.282153	0.00257812	-0.228709	0.0341681	-0.302333	0.0983128	-0.197596	0.1269
Cytokine Signaling in Immune system	IFIT3	0.00929062	0	0	0	0.000532196	-0.27704	0.00310509	-0.268491	0.012436	-0.305564	0.0945935	-0.145596	0.262887
Cytokine Signaling in Immune system	SKP1	0.00781957	0	0	0	0.000429836	-0.315175	0.000712378	-0.270529	0.0117609	na	na	-0.0716991	0.58293
Cytokine Signaling in Immune system	FCGR1A	0.00781957	0	0	1	0.000435132	-0.261394	0.00537139	-0.223911	0.038221	-0.363527	0.0444075	-0.224523	0.0819314
Cytokine Signaling in Immune system	PIK3CD	0.00736661	0	0	1	0.000385813	-0.265809	0.0046164	-0.273184	0.0109297	-0.356898	0.0487333	-0.145993	0.261574
Cytokine Signaling in Immune system	HLA-DQB2	0.00666298	0	0	0	0.000338056	-0.283557	0.00244834	-0.299987	0.00501308	-0.126225	0.498646	-0.219492	0.0892024
Cytokine Signaling in Immune system	PML	0.00587896	0	0	1	0.000288656	-0.257308	0.00616604	-0.285405	0.00772976	-0.378674	0.0356699	-0.145225	0.264118
Cytokine Signaling in Immune system	IL18RAP	0.00586693	0	0	0	0.000271889	-0.164163	0.0837022	-0.430549	3.50622e-05	-0.0427187	0.819508	-0.176583	0.173403
Cytokine Signaling in Immune system	PSMB10	0.00586693	0	0	1	0.000272218	-0.261296	0.0053894	-0.274891	0.0104228	-0.308594	0.0912045	-0.224814	0.0815252
Cytokine Signaling in Immune system	CASP1	0.00586693	0	0	1	0.000278463	-0.229832	0.014779	-0.348776	0.000998064	-0.283753	0.121878	-0.153062	0.238925
Cytokine Signaling in Immune system	HCK	0.00425847	0	0	1	0.000181211	-0.241277	0.0103842	-0.307505	0.00397564	-0.346158	0.0564463	-0.207445	0.108673
Cytokine Signaling in Immune system	UBA7	0.00421993	0	0	0	0.000166515	-0.211379	0.0252689	-0.394132	0.000173525	na	na	-0.117371	0.367665
Cytokine Signaling in Immune system	TNFRSF13B	0.00421993	0	0	1	0.000172665	-0.188409	0.0466549	-0.412127	8.0563e-05	0.0699061	0.70864	-0.219217	0.0896154
Cytokine Signaling in Immune system	HLA-DQA1	0.00394907	0	0	1	0.000148656	-0.248918	0.00813199	-0.313971	0.00324138	-0.319298	0.0799668	-0.216156	0.0942971
Cytokine Signaling in Immune system	CD40LG	0.00341854	0	0	1	0.000121364	-0.241576	0.0102866	-0.322267	0.00247799	0.247955	0.178646	-0.27181	0.0340851
Cytokine Signaling in Immune system	VAV1	0.00341854	0	0	1	0.00012309	-0.227008	0.0160848	-0.366372	0.000521745	-0.264567	0.150353	-0.198496	0.125144
Cytokine Signaling in Immune system	IL18R1	0.00322071	0	0	0	0.000105424	-0.222811	0.0182101	-0.408742	9.33833e-05	-0.121378	0.515407	-0.186899	0.149224
Cytokine Signaling in Immune system	HLA-DQA2	0.00314457	0	0	0	9.5639e-05	-0.321413	0.000549246	-0.173843	0.109427	na	na	-0.31277	0.0141202
Cytokine Signaling in Immune system	GBP2	0.00314457	0	0	0	9.77854e-05	-0.258386	0.00594681	-0.342556	0.00124433	-0.370191	0.0403732	-0.109799	0.399582
Cytokine Signaling in Immune system	CD40	0.00227964	0	0	1	6.3427e-05	-0.280147	0.00277448	-0.319916	0.00267599	-0.355448	0.0497225	-0.169504	0.191568
Cytokine Signaling in Immune system	GBP4	0.00178064	0	0	0	4.66288e-05	-0.256957	0.00623891	-0.393801	0.000175926	-0.173483	0.350653	-0.197596	0.1269
Cytokine Signaling in Immune system	CSF1R	0.00142238	0	0	1	3.38055e-05	-0.282342	0.0025603	-0.309449	0.00374072	-0.200344	0.279862	-0.318387	0.0123952
Cytokine Signaling in Immune system	EBI3	0.00142238	0	0	0	3.49192e-05	-0.272527	0.00364877	-0.363215	0.000587743	-0.104413	0.57617	-0.281527	0.0279507
Cytokine Signaling in Immune system	LTB	0.00138229	0	0	1	2.85556e-05	-0.181348	0.0556747	-0.474493	3.92312e-06	-0.113703	0.5425	-0.156239	0.229199
Cytokine Signaling in Immune system	IL18BP	0.00138229	0	0	0	2.94105e-05	-0.251417	0.00749551	-0.389326	0.00021145	-0.284763	0.120499	-0.187773	0.147298
Cytokine Signaling in Immune system	TNFSF13B	0.000903396	0	0	1	1.62641e-05	-0.321096	0.000556619	-0.32203	0.00249733	-0.268606	0.143993	-0.234028	0.0694772
Cytokine Signaling in Immune system	CD27	0.000804352	0	0	1	1.28613e-05	-0.188061	0.0470694	-0.444637	1.79494e-05	na	na	-0.211523	0.101747
Cytokine Signaling in Immune system	LTA	0.000804352	0	0	1	1.31645e-05	-0.312376	0.000799077	-0.348282	0.00101583	-0.090294	0.62905	-0.294554	0.0212042
Cytokine Signaling in Immune system	HLA-DPB1	0.000789044	0	0	0	1.03312e-05	-0.246881	0.00868559	-0.438617	2.3982e-05	-0.196506	0.289366	-0.193598	0.134927
Cytokine Signaling in Immune system	IRF1	0.000567624	0	0	1	6.50306e-06	-0.281837	0.00260824	-0.390795	0.000199114	-0.32034	0.0789325	-0.203845	0.115087
Cytokine Signaling in Immune system	IL2RB	0.000210911	0	0	1	2.07114e-06	-0.268676	0.00417846	-0.451179	1.30194e-05	-0.260326	0.157247	-0.188806	0.145046
Cytokine Signaling in Immune system	TNFSF14	7.74176e-05	0	0	1	5.37955e-07	-0.316236	0.000681811	-0.371975	0.000421063	-0.342927	0.0589461	-0.308813	0.0154559
Cytokine Signaling in Immune system	CD4	7.74176e-05	0	0	1	5.94376e-07	-0.313716	0.000756445	-0.441091	2.13036e-05	-0.15773	0.396751	-0.256639	0.0458767
Cytokine Signaling in Immune system	IL16	7.74176e-05	0	0	0	6.33532e-07	-0.304825	0.00108345	-0.435962	2.72033e-05	-0.234677	0.203812	-0.249438	0.0525464
Cytokine Signaling in Immune system	RASAL3	1.747e-05	0	0	0	4.61178e-08	-0.287185	0.00213968	-0.488942	1.78254e-06	na	na	-0.259234	0.0436509
Cytokine Signaling in Immune system	TRIM22	1.747e-05	0	0	0	5.7185e-08	-0.30856	0.000932919	-0.452317	1.23039e-05	-0.469757	0.00766812	-0.155736	0.23072
Dectin-2 family	FCER1G	0.00968054	0	0	1	0.00290416	-0.237944	0.011527	-0.185096	0.0879759	-0.382309	0.0337947	-0.151474	0.243893
Dectin-2 family	CLEC4A	0.00636349	0	0	0	0.0012727	-0.190157	0.0446197	-0.324372	0.00231201	-0.253863	0.168184	-0.179486	0.166328
Dectin-2 family	PLCG2	0.000466838	0	0	1	4.66838e-05	-0.256919	0.00624695	-0.401708	0.000126297	-0.0838131	0.653962	-0.215839	0.0947939
Downstream TCR signaling	HLA-DPA1	0.031753	0	0	0	0.00517713	-0.219503	0.0200516	-0.270197	0.0118686	-0.119964	0.520347	-0.189071	0.144472
Downstream TCR signaling	PIK3R1	0.0288363	0	0	1	0.00410956	-0.192326	0.0421977	-0.349325	0.00097858	-0.0107038	0.954427	-0.125712	0.334362
Downstream TCR signaling	TRAT1	0.0288363	0	0	0	0.00438813	-0.198736	0.0356739	-0.318882	0.00276743	-0.146622	0.431235	-0.124897	0.337528
Downstream TCR signaling	SKP1	0.00329541	0	0	0	0.000429836	-0.315175	0.000712378	-0.270529	0.0117609	na	na	-0.0716991	0.58293
Downstream TCR signaling	HLA-DQB2	0.00282738	0	0	0	0.000338056	-0.283557	0.00244834	-0.299987	0.00501308	-0.126225	0.498646	-0.219492	0.0892024
Downstream TCR signaling	PSMB10	0.00250441	0	0	1	0.000272218	-0.261296	0.0053894	-0.274891	0.0104228	-0.308594	0.0912045	-0.224814	0.0815252
Downstream TCR signaling	HLA-DQA1	0.00151959	0	0	1	0.000148656	-0.248918	0.00813199	-0.313971	0.00324138	-0.319298	0.0799668	-0.216156	0.0942971
Downstream TCR signaling	HLA-DQA2	0.00109985	0	0	0	9.5639e-05	-0.321413	0.000549246	-0.173843	0.109427	na	na	-0.31277	0.0141202
Downstream TCR signaling	PRKCQ	0.000194424	0	0	1	1.47931e-05	-0.266763	0.00446629	-0.362428	0.00060534	-0.336262	0.0643762	-0.232466	0.0714129
Downstream TCR signaling	HLA-DPB1	0.000158412	0	0	0	1.03312e-05	-0.246881	0.00868559	-0.438617	2.3982e-05	-0.196506	0.289366	-0.193598	0.134927
Downstream TCR signaling	CD3E	9.51731e-05	0	0	1	5.17245e-06	-0.279809	0.00280885	-0.417617	6.31909e-05	-0.20822	0.26099	-0.227488	0.0778698
Downstream TCR signaling	CD3G	7.0623e-05	0	0	1	1.69657e-06	-0.285846	0.00224926	-0.43236	3.2224e-05	-0.11855	0.525311	-0.285261	0.0258546
Downstream TCR signaling	CD3D	7.0623e-05	0	0	1	2.92435e-06	-0.24858	0.00822166	-0.485586	2.14791e-06	-0.0931126	0.618336	-0.178083	0.169721
Downstream TCR signaling	CD247	7.0623e-05	0	0	1	3.07057e-06	-0.250569	0.00770618	-0.483139	2.45751e-06	-0.0605878	0.74611	-0.191718	0.138831
Downstream TCR signaling	CD4	5.46826e-05	0	0	1	5.94376e-07	-0.313716	0.000756445	-0.441091	2.13036e-05	-0.15773	0.396751	-0.256639	0.0458767
FCERI mediated Ca+2 mobilization	MS4A2	0.0187524	0	0	1	0.00625079	-0.124663	0.190322	-0.361357	0.000630071	-0.170656	0.358681	0.0810138	0.534817
FCERI mediated Ca+2 mobilization	FCER1G	0.00958373	0	0	1	0.00290416	-0.237944	0.011527	-0.185096	0.0879759	-0.382309	0.0337947	-0.151474	0.243893
FCERI mediated Ca+2 mobilization	LAT	0.0081909	0	0	0	0.00223388	-0.180911	0.0562762	-0.258157	0.016402	-0.237302	0.198652	-0.274299	0.032416
FCERI mediated Ca+2 mobilization	ITPR1	0.00440617	0	0	1	0.00106816	-0.196549	0.0377967	-0.327443	0.0020877	-0.295063	0.107084	-0.142498	0.273288
FCERI mediated Ca+2 mobilization	FCER1A	0.00292337	0	0	1	0.000620108	-0.192746	0.0417425	-0.362207	0.00061037	-0.252449	0.170647	-0.144227	0.267451
FCERI mediated Ca+2 mobilization	LCP2	0.00201574	0	0	0	0.000357466	-0.258643	0.00589564	-0.296365	0.00559369	-0.308998	0.0907598	-0.168048	0.195468
FCERI mediated Ca+2 mobilization	GRAP2	0.00201574	0	0	0	0.000366499	-0.263401	0.00501562	-0.342613	0.00124184	0.0304959	0.870634	-0.205963	0.11128
FCERI mediated Ca+2 mobilization	VAV1	0.00101549	0	0	1	0.00012309	-0.227008	0.0160848	-0.366372	0.000521745	-0.264567	0.150353	-0.198496	0.125144
FCERI mediated Ca+2 mobilization	PLCG2	0.000513522	0	0	1	4.66838e-05	-0.256919	0.00624695	-0.401708	0.000126297	-0.0838131	0.653962	-0.215839	0.0947939
FCERI mediated Ca+2 mobilization	ITK	0.000153903	0	0	1	9.32745e-06	-0.212966	0.0241671	-0.472388	4.38781e-06	-0.132889	0.476056	-0.189838	0.142819
FCERI mediated Ca+2 mobilization	BTK	3.15514e-05	0	0	1	9.56104e-07	-0.259905	0.00564973	-0.497579	1.09309e-06	-0.139352	0.454669	-0.173714	0.180608
Fcgamma receptor (FCGR) dependent phagocytosis	PIK3R1	0.0210615	0	0	1	0.00410956	-0.192326	0.0421977	-0.349325	0.00097858	-0.0107038	0.954427	-0.125712	0.334362
Fcgamma receptor (FCGR) dependent phagocytosis	ITPR1	0.00583929	0	0	1	0.00106816	-0.196549	0.0377967	-0.327443	0.0020877	-0.295063	0.107084	-0.142498	0.273288
Fcgamma receptor (FCGR) dependent phagocytosis	FGR	0.00562094	0	0	1	0.000959673	-0.186088	0.0494749	-0.273535	0.0108238	-0.430779	0.0155525	-0.152056	0.242064
Fcgamma receptor (FCGR) dependent phagocytosis	FCGR1A	0.00274468	0	0	1	0.000435132	-0.261394	0.00537139	-0.223911	0.038221	-0.363527	0.0444075	-0.224523	0.0819314
Fcgamma receptor (FCGR) dependent phagocytosis	HCK	0.00123828	0	0	1	0.000181211	-0.241277	0.0103842	-0.307505	0.00397564	-0.346158	0.0564463	-0.207445	0.108673
Fcgamma receptor (FCGR) dependent phagocytosis	VAV1	0.000917579	0	0	1	0.00012309	-0.227008	0.0160848	-0.366372	0.000521745	-0.264567	0.150353	-0.198496	0.125144
Fcgamma receptor (FCGR) dependent phagocytosis	PLD4	0.000823374	0	0	0	0.000100411	-0.316479	0.000674969	-0.127822	0.240858	-0.385742	0.0320977	-0.289523	0.0236246
Fcgamma receptor (FCGR) dependent phagocytosis	PLCG2	0.000425342	0	0	1	4.66838e-05	-0.256919	0.00624695	-0.401708	0.000126297	-0.0838131	0.653962	-0.215839	0.0947939
Fcgamma receptor (FCGR) dependent phagocytosis	ELMO1	0.00031618	0	0	0	3.08468e-05	-0.253068	0.00709939	-0.379968	0.000308038	-0.2577	0.161627	-0.222881	0.0842506
Fcgamma receptor (FCGR) dependent phagocytosis	WIPF1	0.000236991	0	0	0	2.02309e-05	-0.248024	0.00837111	-0.416498	6.64202e-05	na	na	-0.146999	0.258265
Fcgamma receptor (FCGR) dependent phagocytosis	NCKAP1L	7.25398e-05	0	0	0	5.30779e-06	-0.272124	0.00370112	-0.430738	3.47544e-05	-0.155105	0.404756	-0.232466	0.0714129
Fcgamma receptor (FCGR) dependent phagocytosis	CD247	5.03573e-05	0	0	1	3.07057e-06	-0.250569	0.00770618	-0.483139	2.45751e-06	-0.0605878	0.74611	-0.191718	0.138831
Fcgamma receptor (FCGR) dependent phagocytosis	BTK	4.19737e-05	0	0	1	9.56104e-07	-0.259905	0.00564973	-0.497579	1.09309e-06	-0.139352	0.454669	-0.173714	0.180608
Fcgamma receptor (FCGR) dependent phagocytosis	CD3G	4.19737e-05	0	0	1	1.69657e-06	-0.285846	0.00224926	-0.43236	3.2224e-05	-0.11855	0.525311	-0.285261	0.0258546
Fcgamma receptor (FCGR) dependent phagocytosis	WAS	4.19737e-05	0	0	0	2.04646e-06	-0.288638	0.00202627	-0.435213	2.81827e-05	-0.180469	0.331287	-0.238056	0.0646794
Fcgamma receptor (FCGR) dependent phagocytosis	CYFIP2	4.19737e-05	0	0	0	2.0475e-06	-0.294882	0.0015983	-0.453407	1.1653e-05	0.0167626	0.928684	-0.232969	0.0707849
FCGR activation	FCGR3A	0.0422028	0	0	1	0.0224534	-0.240866	0.0105195	-0.125641	0.249043	na	na	-0.152241	0.241483
FCGR activation	FCGR2A	0.0422028	0	0	1	0.0227246	-0.206231	0.0291411	-0.213644	0.0482539	-0.236494	0.20023	-0.0915567	0.482827
FCGR activation	FGR	0.00249515	0	0	1	0.000959673	-0.186088	0.0494749	-0.273535	0.0108238	-0.430779	0.0155525	-0.152056	0.242064
FCGR activation	FCGR1A	0.00141418	0	0	1	0.000435132	-0.261394	0.00537139	-0.223911	0.038221	-0.363527	0.0444075	-0.224523	0.0819314
FCGR activation	HCK	0.000785249	0	0	1	0.000181211	-0.241277	0.0103842	-0.307505	0.00397564	-0.346158	0.0564463	-0.207445	0.108673
FCGR activation	CD3G	1.99587e-05	0	0	1	1.69657e-06	-0.285846	0.00224926	-0.43236	3.2224e-05	-0.11855	0.525311	-0.285261	0.0258546
FCGR activation	CD247	1.99587e-05	0	0	1	3.07057e-06	-0.250569	0.00770618	-0.483139	2.45751e-06	-0.0605878	0.74611	-0.191718	0.138831
Generation of second messenger molecules	HLA-DQB1	0.0374207	0	0	0	0.0258074	-0.149144	0.116538	-0.229733	0.0333514	-0.296274	0.105583	-0.110355	0.397184
Generation of second messenger molecules	ZAP70	0.033462	0	0	1	0.0219234	-0.202646	0.0321267	-0.177853	0.10136	-0.0743285	0.691082	-0.244645	0.0574072
Generation of second messenger molecules	HLA-DRA	0.01671	0	0	1	0.0103717	-0.21567	0.0223847	-0.244627	0.0232081	-0.166414	0.370925	-0.153777	0.236713
Generation of second messenger molecules	HLA-DPA1	0.00883157	0	0	0	0.00517713	-0.219503	0.0200516	-0.270197	0.0118686	-0.119964	0.520347	-0.189071	0.144472
Generation of second messenger molecules	LAT	0.00404891	0	0	0	0.00223388	-0.180911	0.0562762	-0.258157	0.016402	-0.237302	0.198652	-0.274299	0.032416
Generation of second messenger molecules	HLA-DQB2	0.000708565	0	0	0	0.000338056	-0.283557	0.00244834	-0.299987	0.00501308	-0.126225	0.498646	-0.219492	0.0892024
Generation of second messenger molecules	LCP2	0.000708565	0	0	0	0.000357466	-0.258643	0.00589564	-0.296365	0.00559369	-0.308998	0.0907598	-0.168048	0.195468
Generation of second messenger molecules	GRAP2	0.000708565	0	0	0	0.000366499	-0.263401	0.00501562	-0.342613	0.00124184	0.0304959	0.870634	-0.205963	0.11128
Generation of second messenger molecules	HLA-DQA1	0.000359251	0	0	1	0.000148656	-0.248918	0.00813199	-0.313971	0.00324138	-0.319298	0.0799668	-0.216156	0.0942971
Generation of second messenger molecules	HLA-DQA2	0.000252139	0	0	0	9.5639e-05	-0.321413	0.000549246	-0.173843	0.109427	na	na	-0.31277	0.0141202
Generation of second messenger molecules	FYB	2.99604e-05	0	0	0	8.7933e-06	-0.289983	0.00192617	-0.396616	0.00015649	-0.344341	0.0578419	-0.113029	0.385773
Generation of second messenger molecules	ITK	2.99604e-05	0	0	1	9.32745e-06	-0.212966	0.0241671	-0.472388	4.38781e-06	-0.132889	0.476056	-0.189838	0.142819
Generation of second messenger molecules	HLA-DPB1	2.99604e-05	0	0	0	1.03312e-05	-0.246881	0.00868559	-0.438617	2.3982e-05	-0.196506	0.289366	-0.193598	0.134927
Generation of second messenger molecules	CD3E	2.14287e-05	0	0	1	5.17245e-06	-0.279809	0.00280885	-0.417617	6.31909e-05	-0.20822	0.26099	-0.227488	0.0778698
Generation of second messenger molecules	CD3D	1.48411e-05	0	0	1	2.92435e-06	-0.24858	0.00822166	-0.485586	2.14791e-06	-0.0931126	0.618336	-0.178083	0.169721
Generation of second messenger molecules	CD247	1.48411e-05	0	0	1	3.07057e-06	-0.250569	0.00770618	-0.483139	2.45751e-06	-0.0605878	0.74611	-0.191718	0.138831
Generation of second messenger molecules	CD3G	1.48368e-05	0	0	1	1.69657e-06	-0.285846	0.00224926	-0.43236	3.2224e-05	-0.11855	0.525311	-0.285261	0.0258546
Generation of second messenger molecules	WAS	1.48368e-05	0	0	0	2.04646e-06	-0.288638	0.00202627	-0.435213	2.81827e-05	-0.180469	0.331287	-0.238056	0.0646794
Generation of second messenger molecules	CD4	1.07524e-05	0	0	1	5.94376e-07	-0.313716	0.000756445	-0.441091	2.13036e-05	-0.15773	0.396751	-0.256639	0.0458767
Generation of second messenger molecules	EVL	1.07524e-05	0	0	0	7.41543e-07	-0.278097	0.00298883	-0.466737	5.90453e-06	-0.3092	0.090538	-0.153751	0.236794
Immunoregulatory interactions between a Lymphoid and a non-Lymphoid cell	CD300LG	0.0473967	0	0	0	0.0276561	-0.11251	0.237568	-0.10759	0.324124	0.145254	0.435594	-0.352259	0.00536663
Immunoregulatory interactions between a Lymphoid and a non-Lymphoid cell	CRTAM	0.0473967	0	0	0	0.0278402	-0.197473	0.0368869	-0.204153	0.0593699	-0.224579	0.224516	-0.116899	0.369609
Immunoregulatory interactions between a Lymphoid and a non-Lymphoid cell	KLRG1	0.0473967	0	0	0	0.0279302	-0.137944	0.14694	-0.278114	0.00952121	0.00262547	0.988816	-0.195046	0.131977
Immunoregulatory interactions between a Lymphoid and a non-Lymphoid cell	FCGR3A	0.0399172	0	0	1	0.0224534	-0.240866	0.0105195	-0.125641	0.249043	na	na	-0.152241	0.241483
Immunoregulatory interactions between a Lymphoid and a non-Lymphoid cell	LAIR2	0.0378871	0	0	0	0.0209732	-0.0926354	0.331322	-0.270615	0.0117334	-0.303141	0.0973728	-0.12933	0.320525
Immunoregulatory interactions between a Lymphoid and a non-Lymphoid cell	ICAM1	0.031886	0	0	1	0.0173665	-0.190572	0.0441476	-0.132126	0.22525	-0.416642	0.0197224	-0.0933306	0.47435
Immunoregulatory interactions between a Lymphoid and a non-Lymphoid cell	ICAM3	0.0311831	0	0	1	0.0167052	-0.0768886	0.420371	-0.354455	0.000812817	-0.0242351	0.897034	-0.138394	0.287483
Immunoregulatory interactions between a Lymphoid and a non-Lymphoid cell	LILRA5	0.0268814	0	0	0	0.0141607	-0.198577	0.0358241	-0.206827	0.0560456	-0.133495	0.474029	-0.230771	0.0735612
Immunoregulatory interactions between a Lymphoid and a non-Lymphoid cell	SIGLEC8	0.0192336	0	0	0	0.00996026	-0.211261	0.0253521	-0.263381	0.0142786	-0.0044431	0.981075	-0.200376	0.121535
Immunoregulatory interactions between a Lymphoid and a non-Lymphoid cell	B2M	0.0172459	0	0	1	0.00877691	-0.274208	0.00343699	-0.162115	0.13589	-0.251566	0.172199	-0.0981229	0.451854
Immunoregulatory interactions between a Lymphoid and a non-Lymphoid cell	LILRB4	0.0168848	0	0	0	0.00844238	-0.230418	0.0145198	-0.235213	0.0292546	-0.203373	0.272502	-0.135482	0.297846
Immunoregulatory interactions between a Lymphoid and a non-Lymphoid cell	IFITM1	0.0153606	0	0	0	0.00754317	-0.196797	0.0375505	-0.243755	0.0237194	-0.328992	0.0707378	-0.0942573	0.469954
Immunoregulatory interactions between a Lymphoid and a non-Lymphoid cell	KLRD1	0.0121802	0	0	0	0.0058726	-0.192678	0.0418156	-0.25681	0.0169915	-0.263355	0.1523	-0.168013	0.195563
Immunoregulatory interactions between a Lymphoid and a non-Lymphoid cell	KLRF1	0.010421	0	0	0	0.00488965	-0.237202	0.0117956	-0.257025	0.0168964	-0.0999699	0.592595	-0.190968	0.140413
Immunoregulatory interactions between a Lymphoid and a non-Lymphoid cell	SIGLEC12	0.010421	0	0	0	0.00493137	-0.188874	0.0461066	-0.159773	0.141711	na	na	-0.31277	0.0141202
Immunoregulatory interactions between a Lymphoid and a non-Lymphoid cell	KLRK1	0.00809533	0	0	0	0.00368627	-0.260132	0.00560652	-0.168467	0.121012	-0.314047	0.0853384	-0.167386	0.197259
Immunoregulatory interactions between a Lymphoid and a non-Lymphoid cell	FCGR2B	0.00756092	0	0	1	0.00337541	-0.24573	0.00901291	-0.217616	0.0441411	-0.219328	0.235826	-0.207578	0.108442
Immunoregulatory interactions between a Lymphoid and a non-Lymphoid cell	HLA-G	0.00748237	0	0	0	0.00327354	-0.22296	0.0181303	-0.158702	0.144436	-0.411997	0.0212793	-0.175779	0.1754
Immunoregulatory interactions between a Lymphoid and a non-Lymphoid cell	HLA-E	0.00723405	0	0	0	0.00310031	-0.216748	0.0217061	-0.0683671	0.531666	-0.51439	0.0030717	-0.147449	0.256794
Immunoregulatory interactions between a Lymphoid and a non-Lymphoid cell	CLEC2D	0.00714363	0	0	0	0.00299777	-0.25537	0.00657824	-0.21937	0.0424199	-0.308019	0.0918404	-0.124282	0.339933
Immunoregulatory interactions between a Lymphoid and a non-Lymphoid cell	NCR3	0.00676703	0	0	0	0.00277932	-0.244575	0.00935246	-0.230975	0.032383	-0.19693	0.288306	-0.218696	0.0903981
Immunoregulatory interactions between a Lymphoid and a non-Lymphoid cell	ITGA4	0.0052774	0	0	1	0.00212039	-0.213565	0.0237621	-0.325576	0.00222162	-0.198324	0.284839	-0.116921	0.369518
Immunoregulatory interactions between a Lymphoid and a non-Lymphoid cell	VCAM1	0.00514826	0	0	1	0.00202253	-0.178836	0.0592097	-0.369596	0.00046142	-0.0441326	0.813637	-0.15428	0.235164
Immunoregulatory interactions between a Lymphoid and a non-Lymphoid cell	SIGLEC5	0.00426806	0	0	0	0.00163863	-0.281644	0.00262672	-0.076132	0.485991	-0.268202	0.14462	-0.293707	0.0215965
Immunoregulatory interactions between a Lymphoid and a non-Lymphoid cell	CD22	0.00417881	0	0	1	0.00154908	-0.228612	0.0153311	-0.281432	0.00866515	na	na	-0.178374	0.169013
Immunoregulatory interactions between a Lymphoid and a non-Lymphoid cell	SIGLEC9	0.00417881	0	0	0	0.00156706	-0.268826	0.00415664	-0.0824653	0.45034	-0.387964	0.031037	-0.237947	0.0648057
Immunoregulatory interactions between a Lymphoid and a non-Lymphoid cell	CD200R1	0.00302502	0	0	0	0.00107419	-0.281356	0.00265459	-0.210458	0.051776	-0.202161	0.275431	-0.240915	0.0614376
Immunoregulatory interactions between a Lymphoid and a non-Lymphoid cell	CD300C	0.00302502	0	0	0	0.00108037	-0.280604	0.00272853	-0.130809	0.229951	-0.310209	0.0894353	-0.261537	0.0417502
Immunoregulatory interactions between a Lymphoid and a non-Lymphoid cell	CD226	0.00257841	0	0	0	0.000858217	-0.257701	0.00608537	-0.280674	0.00885463	-0.0723014	0.699111	-0.255971	0.0464644
Immunoregulatory interactions between a Lymphoid and a non-Lymphoid cell	SIGLEC7	0.00257841	0	0	0	0.000874819	-0.285276	0.00229733	-0.220953	0.0409145	-0.20923	0.258633	-0.230613	0.0737652
Immunoregulatory interactions between a Lymphoid and a non-Lymphoid cell	TREM2	0.00228898	0	0	0	0.000735744	-0.298052	0.00141404	-0.22996	0.0331722	-0.172473	0.353508	-0.221028	0.0869311
Immunoregulatory interactions between a Lymphoid and a non-Lymphoid cell	SIGLEC1	0.00215145	0	0	0	0.000644263	-0.285764	0.00225607	-0.197308	0.0686176	-0.232657	0.207844	-0.266462	0.0379149
Immunoregulatory interactions between a Lymphoid and a non-Lymphoid cell	SH2D1A	0.00215145	0	0	0	0.000659833	-0.195347	0.0390087	-0.387164	0.00023088	-0.114219	0.540656	-0.147032	0.258158
Immunoregulatory interactions between a Lymphoid and a non-Lymphoid cell	SELL	0.00215145	0	0	1	0.000672327	-0.191599	0.0429973	-0.373758	0.000392984	-0.163789	0.378626	-0.165956	0.201168
Immunoregulatory interactions between a Lymphoid and a non-Lymphoid cell	CD300LB	0.00196275	0	0	0	0.000560785	-0.264428	0.00484173	-0.250885	0.0198082	-0.304151	0.0962073	-0.206058	0.111111
Immunoregulatory interactions between a Lymphoid and a non-Lymphoid cell	LILRB1	0.0019064	0	0	0	0.000518935	-0.257617	0.00610257	-0.304139	0.00441372	-0.232455	0.20825	-0.179674	0.165878
Immunoregulatory interactions between a Lymphoid and a non-Lymphoid cell	CD300LF	0.0019064	0	0	0	0.000527665	-0.217903	0.0209987	-0.320342	0.00263904	-0.221291	0.231554	-0.230401	0.0740379
Immunoregulatory interactions between a Lymphoid and a non-Lymphoid cell	FCGR1A	0.00168051	0	0	1	0.000435132	-0.261394	0.00537139	-0.223911	0.038221	-0.363527	0.0444075	-0.224523	0.0819314
Immunoregulatory interactions between a Lymphoid and a non-Lymphoid cell	SLAMF7	0.00152712	0	0	1	0.000381781	-0.228698	0.0152918	-0.359973	0.000663391	-0.0910836	0.626041	-0.212608	0.0999617
Immunoregulatory interactions between a Lymphoid and a non-Lymphoid cell	SIGLEC10	0.00132986	0	0	0	0.00032059	-0.212624	0.0244011	-0.36348	0.000581914	-0.255882	0.16471	-0.159814	0.218589
Immunoregulatory interactions between a Lymphoid and a non-Lymphoid cell	LILRB2	0.00122742	0	0	0	0.000284937	-0.257946	0.00603556	-0.272312	0.011197	-0.212259	0.251644	-0.285022	0.0259843
Immunoregulatory interactions between a Lymphoid and a non-Lymphoid cell	LAIR1	0.00117539	0	0	0	0.000262364	-0.323809	0.000496296	-0.0939372	0.389627	-0.316066	0.0832407	-0.287246	0.0247947
Immunoregulatory interactions between a Lymphoid and a non-Lymphoid cell	CD1C	0.000701886	0	0	0	0.000150404	-0.18329	0.0530613	-0.398152	0.000146744	-0.291154	0.112037	-0.155604	0.231122
Immunoregulatory interactions between a Lymphoid and a non-Lymphoid cell	CD40LG	0.000590988	0	0	1	0.000121364	-0.241576	0.0102866	-0.322267	0.00247799	0.247955	0.178646	-0.27181	0.0340851
Immunoregulatory interactions between a Lymphoid and a non-Lymphoid cell	ITGB7	0.000576222	0	0	1	0.000113187	-0.246616	0.00876009	-0.399565	0.000138278	-0.04999	0.789422	-0.186952	0.149107
Immunoregulatory interactions between a Lymphoid and a non-Lymphoid cell	CD40	0.00034677	0	0	1	6.3427e-05	-0.280147	0.00277448	-0.319916	0.00267599	-0.355448	0.0497225	-0.169504	0.191568
Immunoregulatory interactions between a Lymphoid and a non-Lymphoid cell	C3	0.00034677	0	0	1	6.50194e-05	-0.302104	0.00120668	-0.268832	0.0123207	na	na	-0.268226	0.036614
Immunoregulatory interactions between a Lymphoid and a non-Lymphoid cell	CD33	0.000257705	0	0	1	4.36263e-05	-0.237986	0.0115117	-0.394151	0.000173389	-0.358817	0.047448	-0.0929599	0.476115
Immunoregulatory interactions between a Lymphoid and a non-Lymphoid cell	TYROBP	0.000257705	0	0	0	4.37179e-05	-0.315179	0.000712252	-0.214611	0.0472247	-0.360295	0.0464762	-0.279886	0.0289166
Immunoregulatory interactions between a Lymphoid and a non-Lymphoid cell	SIGLEC11	0.000184383	0	0	0	2.79867e-05	-0.276997	0.00310993	-0.234066	0.0300751	-0.398102	0.0265519	-0.324701	0.0106763
Immunoregulatory interactions between a Lymphoid and a non-Lymphoid cell	ITGB2	0.000174108	0	0	1	2.48725e-05	-0.300832	0.00126862	-0.296508	0.00556958	-0.345956	0.0566	-0.24446	0.0576023
Immunoregulatory interactions between a Lymphoid and a non-Lymphoid cell	CD19	0.000116651	0	0	1	1.56229e-05	-0.182697	0.0538484	-0.473696	4.09321e-06	0.0537212	0.774095	-0.227606	0.0777116
Immunoregulatory interactions between a Lymphoid and a non-Lymphoid cell	LILRA1	8.21145e-05	0	0	0	1.02643e-05	-0.310257	0.000871056	-0.213445	0.0484681	-0.455666	0.00999355	-0.299272	0.0191286
Immunoregulatory interactions between a Lymphoid and a non-Lymphoid cell	CD300A	7.35258e-05	0	0	0	7.60859e-06	-0.306331	0.00102027	-0.263438	0.0142568	-0.413411	0.0207951	-0.300167	0.0187552
Immunoregulatory interactions between a Lymphoid and a non-Lymphoid cell	ITGAL	7.35258e-05	0	0	1	8.19408e-06	-0.260996	0.00544455	-0.428463	3.86195e-05	-0.200465	0.279565	-0.209405	0.105301
Immunoregulatory interactions between a Lymphoid and a non-Lymphoid cell	CD8A	7.35258e-05	0	0	0	8.53425e-06	-0.248049	0.00836416	-0.391421	0.000194066	-0.352015	0.0521291	-0.228336	0.0767392
Immunoregulatory interactions between a Lymphoid and a non-Lymphoid cell	CD3E	5.79315e-05	0	0	1	5.17245e-06	-0.279809	0.00280885	-0.417617	6.31909e-05	-0.20822	0.26099	-0.227488	0.0778698
Immunoregulatory interactions between a Lymphoid and a non-Lymphoid cell	CD3D	3.82115e-05	0	0	1	2.92435e-06	-0.24858	0.00822166	-0.485586	2.14791e-06	-0.0931126	0.618336	-0.178083	0.169721
Immunoregulatory interactions between a Lymphoid and a non-Lymphoid cell	CD247	3.82115e-05	0	0	1	3.07057e-06	-0.250569	0.00770618	-0.483139	2.45751e-06	-0.0605878	0.74611	-0.191718	0.138831
Immunoregulatory interactions between a Lymphoid and a non-Lymphoid cell	SLAMF6	2.71451e-05	0	0	1	1.54182e-06	-0.200841	0.0337255	-0.518826	3.09552e-07	-0.0585682	0.754309	-0.205619	0.111892
Immunoregulatory interactions between a Lymphoid and a non-Lymphoid cell	CD3G	2.71451e-05	0	0	1	1.69657e-06	-0.285846	0.00224926	-0.43236	3.2224e-05	-0.11855	0.525311	-0.285261	0.0258546
Immunoregulatory interactions between a Lymphoid and a non-Lymphoid cell	CD96	2.23034e-05	0	0	0	9.95685e-07	-0.253684	0.00695644	-0.489662	1.71215e-06	-0.0713998	0.702692	-0.239085	0.0634968
Immunoregulatory interactions between a Lymphoid and a non-Lymphoid cell	KLRB1	2.19958e-05	0	0	0	4.67402e-07	-0.238793	0.0112256	-0.519698	2.93383e-07	-0.0898719	0.63066	-0.208322	0.107154
Immunoregulatory interactions between a Lymphoid and a non-Lymphoid cell	CLEC2B	2.19958e-05	0	0	0	6.60576e-07	-0.303161	0.0011574	-0.411653	8.22544e-05	-0.471575	0.00740466	-0.0942838	0.469829
Immunoregulatory interactions between a Lymphoid and a non-Lymphoid cell	HCST	2.19958e-05	0	0	0	7.85565e-07	-0.301586	0.00123156	-0.37628	0.000356183	-0.372009	0.0393256	-0.289894	0.0234386
Immunoregulatory interactions between a Lymphoid and a non-Lymphoid cell	CD1D	6.70798e-07	0	0	0	5.98926e-09	-0.298159	0.00140818	-0.488401	1.83712e-06	-0.351849	0.0522481	-0.320263	0.0118613
Inflammasomes	NLRC4	0.0110238	0	0	0	0.00453923	-0.200811	0.0337526	-0.259693	0.0157511	na	na	-0.183616	0.15663
Inflammasomes	BCL2	0.00672354	0	0	1	0.00237302	-0.157692	0.096805	-0.383997	0.000262327	-0.0688681	0.712782	-0.120458	0.355115
Inflammasomes	PSTPIP1	0.00271093	0	0	0	0.000797332	-0.195026	0.0393375	-0.324808	0.0022789	-0.20923	0.258633	-0.234584	0.0687984
Inflammasomes	CASP1	0.00237262	0	0	1	0.000278463	-0.229832	0.014779	-0.348776	0.000998064	-0.283753	0.121878	-0.153062	0.238925
Inflammasomes	NLRP3	0.00237262	0	0	1	0.000358359	-0.248802	0.00816254	-0.293843	0.00603243	na	na	-0.225847	0.080098
Inflammasomes	P2RX7	0.00237262	0	0	1	0.000472607	-0.252037	0.00734447	-0.262689	0.0145454	-0.356862	0.0487576	-0.18261	0.158953
Inflammasomes	AIM2	0.00237262	0	0	0	0.000558264	-0.152665	0.108063	-0.323035	0.00241623	-0.470565	0.00755006	-0.0845403	0.517126
Initial triggering of complement	CRP	0.0258178	0	0	1	0.0135883	-0.269234	0.00409764	0.0176438	0.871904	-0.249951	0.175061	-0.209157	0.105722
Initial triggering of complement	FCN1	0.0152972	0	0	0	0.00724604	-0.142324	0.134407	-0.281565	0.00863236	-0.201879	0.276117	-0.220604	0.0875531
Initial triggering of complement	CFP	0.00665527	0	0	0	0.00280222	-0.22222	0.0185277	-0.155677	0.152342	-0.0480663	0.797354	-0.367789	0.00354491
Initial triggering of complement	C1S	0.00107191	0	0	1	0.000394915	-0.243737	0.00960571	-0.313241	0.00331772	-0.311219	0.0883429	-0.15428	0.235164
Initial triggering of complement	C1R	0.000873135	0	0	1	0.000275727	-0.267491	0.0043548	-0.327842	0.0020601	na	na	-0.128571	0.323395
Initial triggering of complement	C3	0.000247074	0	0	1	6.50194e-05	-0.302104	0.00120668	-0.268832	0.0123207	na	na	-0.268226	0.036614
Initial triggering of complement	C1QB	7.40849e-05	0	0	1	1.55968e-05	-0.331001	0.00036425	-0.2318	0.0317529	-0.36797	0.0416839	-0.282401	0.0274478
Initial triggering of complement	C1QC	5.03799e-05	0	0	0	7.95472e-06	-0.348949	0.000162764	-0.212032	0.0500104	-0.350399	0.053293	-0.313829	0.01378
Initial triggering of complement	C1QA	1.09232e-05	0	0	1	9.33439e-07	-0.318687	0.000615758	-0.362656	0.000600203	-0.406746	0.0231598	-0.244433	0.0576302
Initial triggering of complement	GZMM	1.09232e-05	0	0	0	1.14981e-06	-0.327471	0.000424368	-0.348937	0.000992317	-0.146738	0.430868	-0.368689	0.00345856
Innate Immune System	TEK	0.0449273	0	0	1	0.0048559	-0.144069	0.129646	-0.349411	0.000975588	0.0337272	0.857059	-0.18584	0.151584
Innate Immune System	STK10	0.0446352	0	0	1	0.0047838	-0.216983	0.0215604	-0.304376	0.00438152	-0.162493	0.382463	-0.0994203	0.445866
Innate Immune System	NLRC4	0.0427153	0	0	0	0.00453923	-0.200811	0.0337526	-0.259693	0.0157511	na	na	-0.183616	0.15663
Innate Immune System	TRAT1	0.0416494	0	0	0	0.00438813	-0.198736	0.0356739	-0.318882	0.00276743	-0.146622	0.431235	-0.124897	0.337528
Innate Immune System	PIK3R1	0.0393445	0	0	1	0.00410956	-0.192326	0.0421977	-0.349325	0.00097858	-0.0107038	0.954427	-0.125712	0.334362
Innate Immune System	CHI3L1	0.0373865	0	0	1	0.00387108	-0.163768	0.0844593	-0.177863	0.101341	-0.498234	0.00433794	-0.127353	0.328038
Innate Immune System	DEFA4	0.0368178	0	0	1	0.00377876	0.320622	0.000567825	-0.0467459	0.669093	-0.361352	0.0457918	-0.0542064	0.678206
Innate Immune System	KLRK1	0.0365213	0	0	0	0.00368627	-0.260132	0.00560652	-0.168467	0.121012	-0.314047	0.0853384	-0.167386	0.197259
Innate Immune System	UBE2L6	0.0365213	0	0	0	0.00371515	-0.23746	0.0117016	-0.152027	0.162309	-0.441685	0.0128622	-0.0937542	0.472338
Innate Immune System	RASGRP1	0.0357756	0	0	0	0.00357431	-0.150209	0.113921	-0.362883	0.000595106	-0.0914876	0.624504	-0.146761	0.259046
Innate Immune System	MAPK10	0.0342244	0	0	1	0.00338825	-0.166835	0.0787212	-0.301551	0.0047793	-0.296072	0.105832	-0.147449	0.256794
Innate Immune System	ZBP1	0.0337993	0	0	0	0.00331546	-0.16488	0.0823411	-0.368221	0.000486319	-0.0728137	0.697079	-0.120231	0.356027
Innate Immune System	MAPK14	0.0334816	0	0	1	0.00325389	0.216166	0.0220701	0.327538	0.0020811	0.154095	0.407859	0.0844344	0.517653
Innate Immune System	HLA-E	0.0322023	0	0	0	0.00310031	-0.216748	0.0217061	-0.0683671	0.531666	-0.51439	0.0030717	-0.147449	0.256794
Innate Immune System	LY96	0.0316251	0	0	1	0.00301601	-0.234699	0.0127438	-0.229372	0.0336369	-0.291831	0.111166	-0.172287	0.184272
Innate Immune System	FCER1G	0.030745	0	0	1	0.00290416	-0.237944	0.011527	-0.185096	0.0879759	-0.382309	0.0337947	-0.151474	0.243893
Innate Immune System	CFP	0.0299538	0	0	0	0.00280222	-0.22222	0.0185277	-0.155677	0.152342	-0.0480663	0.797354	-0.367789	0.00354491
Innate Immune System	BCL2	0.0256146	0	0	1	0.00237302	-0.157692	0.096805	-0.383997	0.000262327	-0.0688681	0.712782	-0.120458	0.355115
Innate Immune System	TNFRSF1B	0.0252199	0	0	1	0.0023002	-0.200879	0.0336907	-0.316398	0.00299876	0.0450369	0.809887	-0.229315	0.0754482
Innate Immune System	MAPK13	0.0252199	0	0	1	0.00231354	0.262849	0.00511132	0.291653	0.00643786	0.232378	0.208406	0.0152771	0.906974
Innate Immune System	LAT	0.0249987	0	0	0	0.00223388	-0.180911	0.0562762	-0.258157	0.016402	-0.237302	0.198652	-0.274299	0.032416
Innate Immune System	AP1M1	0.0249987	0	0	0	0.00224784	-0.239	0.0111533	-0.323708	0.00236323	-0.0252449	0.892768	-0.148111	0.254641
Innate Immune System	TLR8	0.0233555	0	0	1	0.00205766	-0.189203	0.0457211	-0.317081	0.00293352	-0.197112	0.287852	-0.191904	0.138442
Innate Immune System	IFI16	0.0215468	0	0	0	0.00187874	-0.184214	0.0518538	-0.370648	0.000443155	-0.204989	0.268629	-0.038206	0.770033
Innate Immune System	CFH	0.0215233	0	0	0	0.00185714	-0.225181	0.0169819	-0.32422	0.00232363	-0.232253	0.208657	-0.0743997	0.56878
Innate Immune System	CSF2RA	0.0213171	0	0	1	0.00181999	-0.243253	0.00975452	-0.2223	0.0396696	-0.278502	0.129239	-0.218142	0.0912379
Innate Immune System	SIGLEC5	0.0193993	0	0	0	0.00163863	-0.281644	0.00262672	-0.076132	0.485991	-0.268202	0.14462	-0.293707	0.0215965
Innate Immune System	SIGLEC9	0.0187536	0	0	0	0.00156706	-0.268826	0.00415664	-0.0824653	0.45034	-0.387964	0.031037	-0.237947	0.0648057
Innate Immune System	CLEC4A	0.0153982	0	0	0	0.0012727	-0.190157	0.0446197	-0.324372	0.00231201	-0.253863	0.168184	-0.179486	0.166328
Innate Immune System	TLR10	0.0145538	0	0	0	0.00118968	-0.189821	0.0450055	-0.364372	0.000562726	-0.173483	0.350653	-0.135383	0.298201
Innate Immune System	ITPR1	0.013273	0	0	1	0.00106816	-0.196549	0.0377967	-0.327443	0.0020877	-0.295063	0.107084	-0.142498	0.273288
Innate Immune System	LTF	0.013273	0	0	1	0.00107293	-0.221489	0.0189279	-0.272956	0.0109989	na	na	-0.234081	0.0694123
Innate Immune System	ITGAX	0.0131677	0	0	1	0.0010405	-0.229513	0.0149214	-0.266852	0.013003	-0.38857	0.0307527	-0.115756	0.374339
Innate Immune System	FGR	0.012286	0	0	1	0.000959673	-0.186088	0.0494749	-0.273535	0.0108238	-0.430779	0.0155525	-0.152056	0.242064
Innate Immune System	PSTPIP1	0.0104946	0	0	0	0.000797332	-0.195026	0.0393375	-0.324808	0.0022789	-0.20923	0.258633	-0.234584	0.0687984
Innate Immune System	PDE1A	0.0104946	0	0	1	0.000801787	-0.220547	0.0194538	-0.362457	0.000604696	-0.0723014	0.699111	-0.168101	0.195325
Innate Immune System	C16ORF62	0.0104946	0	0	0	0.000810207	-0.21164	0.0250845	-0.359498	0.000675167	na	na	-0.066537	0.610412
Innate Immune System	TREM2	0.00987871	0	0	0	0.000735744	-0.298052	0.00141404	-0.22996	0.0331722	-0.172473	0.353508	-0.221028	0.0869311
Innate Immune System	SELL	0.00914749	0	0	1	0.000672327	-0.191599	0.0429973	-0.373758	0.000392984	-0.163789	0.378626	-0.165956	0.201168
Innate Immune System	CD68	0.00914749	0	0	0	0.000672976	-0.283082	0.00249158	-0.179787	0.0976395	-0.171801	0.355416	-0.310414	0.0149031
Innate Immune System	FCER1A	0.00864226	0	0	1	0.000620108	-0.192746	0.0417425	-0.362207	0.00061037	-0.252449	0.170647	-0.144227	0.267451
Innate Immune System	CYLD	0.00821011	0	0	0	0.000581643	-0.196682	0.0376649	-0.405121	0.000109179	-0.195699	0.291393	-0.0171569	0.895587
Innate Immune System	AIM2	0.0080185	0	0	0	0.000558264	-0.152665	0.108063	-0.323035	0.00241623	-0.470565	0.00755006	-0.0845403	0.517126
Innate Immune System	CD300LB	0.0080185	0	0	0	0.000560785	-0.264428	0.00484173	-0.250885	0.0198082	-0.304151	0.0962073	-0.206058	0.111111
Innate Immune System	P2RX7	0.00693786	0	0	1	0.000472607	-0.252037	0.00734447	-0.262689	0.0145454	-0.356862	0.0487576	-0.18261	0.158953
Innate Immune System	SKP1	0.00647405	0	0	0	0.000429836	-0.315175	0.000712378	-0.270529	0.0117609	na	na	-0.0716991	0.58293
Innate Immune System	TRPM2	0.00647405	0	0	1	0.000429861	0.240708	0.010572	0.331075	0.00184794	0.328386	0.0712892	0.0823163	0.528249
Innate Immune System	FCGR1A	0.00647405	0	0	1	0.000435132	-0.261394	0.00537139	-0.223911	0.038221	-0.363527	0.0444075	-0.224523	0.0819314
Innate Immune System	C1S	0.00612396	0	0	1	0.000394915	-0.243737	0.00960571	-0.313241	0.00331772	-0.311219	0.0883429	-0.15428	0.235164
Innate Immune System	PIK3CD	0.00606828	0	0	1	0.000385813	-0.265809	0.0046164	-0.273184	0.0109297	-0.356898	0.0487333	-0.145993	0.261574
Innate Immune System	GRAP2	0.00584805	0	0	0	0.000366499	-0.263401	0.00501562	-0.342613	0.00124184	0.0304959	0.870634	-0.205963	0.11128
Innate Immune System	LCP2	0.00583171	0	0	0	0.000357466	-0.258643	0.00589564	-0.296365	0.00559369	-0.308998	0.0907598	-0.168048	0.195468
Innate Immune System	NLRP3	0.00583171	0	0	1	0.000358359	-0.248802	0.00816254	-0.293843	0.00603243	na	na	-0.225847	0.080098
Innate Immune System	MNDA	0.00583171	0	0	0	0.000360178	-0.236994	0.0118722	-0.310548	0.00361335	-0.338282	0.062691	-0.15947	0.219596
Innate Immune System	LILRB2	0.00482639	0	0	0	0.000284937	-0.257946	0.00603556	-0.272312	0.011197	-0.212259	0.251644	-0.285022	0.0259843
Innate Immune System	PSMB10	0.00479044	0	0	1	0.000272218	-0.261296	0.0053894	-0.274891	0.0104228	-0.308594	0.0912045	-0.224814	0.0815252
Innate Immune System	C1R	0.00479044	0	0	1	0.000275727	-0.267491	0.0043548	-0.327842	0.0020601	na	na	-0.128571	0.323395
Innate Immune System	CASP1	0.00479044	0	0	1	0.000278463	-0.229832	0.014779	-0.348776	0.000998064	-0.283753	0.121878	-0.153062	0.238925
Innate Immune System	LAIR1	0.00473546	0	0	0	0.000262364	-0.323809	0.000496296	-0.0939372	0.389627	-0.316066	0.0832407	-0.287246	0.0247947
Innate Immune System	GNLY	0.00466556	0	0	0	0.000254254	-0.264231	0.00487471	-0.250392	0.0200596	-0.354237	0.0505616	-0.227647	0.0776568
Innate Immune System	PTPRC	0.00438528	0	0	1	0.000231876	-0.216414	0.0219142	-0.383106	0.000271863	-0.244169	0.185587	-0.132146	0.310011
Innate Immune System	PLEKHO2	0.00438528	0	0	0	0.000234997	-0.234478	0.0128305	-0.350662	0.000932649	na	na	-0.165956	0.201168
Innate Immune System	TLR7	0.00424842	0	0	1	0.000219945	-0.258917	0.0058415	-0.352179	0.00088291	-0.230032	0.213166	-0.13707	0.292164
Innate Immune System	MEF2C	0.00416096	0	0	0	0.000211638	-0.192515	0.0419928	-0.428434	3.86702e-05	-0.193275	0.297527	-0.0621674	0.634103
Innate Immune System	LAT2	0.00399878	0	0	0	0.000199758	-0.283184	0.00248217	-0.25791	0.0165086	-0.365344	0.0432766	-0.181763	0.160929
Innate Immune System	HCK	0.0036947	0	0	1	0.000181211	-0.241277	0.0103842	-0.307505	0.00397564	-0.346158	0.0564463	-0.207445	0.108673
Innate Immune System	UBA7	0.00345911	0	0	0	0.000166515	-0.211379	0.0252689	-0.394132	0.000173525	na	na	-0.117371	0.367665
Innate Immune System	CD36	0.00333285	0	0	1	0.00015741	-0.248323	0.00829034	-0.387344	0.0002292	-0.133091	0.47538	-0.154015	0.235978
Innate Immune System	CECR1	0.00295654	0	0	0	0.000136952	-0.223649	0.0177671	-0.406514	0.000102828	-0.143795	0.440269	-0.158119	0.223575
Innate Immune System	CD209	0.00284224	0	0	0	0.000129075	-0.25024	0.00778952	-0.382234	0.000281503	-0.147228	0.429313	-0.174853	0.177723
Innate Immune System	CYBB	0.00282813	0	0	0	0.000118131	-0.247065	0.00863425	-0.349667	0.000966662	-0.338888	0.0621922	-0.137865	0.289349
Innate Immune System	CLEC12A	0.00282813	0	0	0	0.000118416	-0.212087	0.024772	-0.355346	0.000786775	-0.294861	0.107336	-0.231994	0.0720067
Innate Immune System	VAV1	0.00282813	0	0	1	0.00012309	-0.227008	0.0160848	-0.366372	0.000521745	-0.264567	0.150353	-0.198496	0.125144
Innate Immune System	LRMP	0.00282813	0	0	0	0.000123561	-0.200661	0.0338882	-0.443936	1.85711e-05	-0.0553368	0.767484	-0.127247	0.328444
Innate Immune System	ATP8B4	0.00282813	0	0	0	0.000125866	-0.200195	0.0343137	-0.409653	8.97616e-05	-0.269616	0.142434	-0.116842	0.369846
Innate Immune System	PLD4	0.00251257	0	0	0	0.000100411	-0.316479	0.000674969	-0.127822	0.240858	-0.385742	0.0320977	-0.289523	0.0236246
Innate Immune System	C3	0.00168149	0	0	1	6.50194e-05	-0.302104	0.00120668	-0.268832	0.0123207	na	na	-0.268226	0.036614
Innate Immune System	CCR2	0.00168149	0	0	1	6.56711e-05	-0.228159	0.015541	-0.370515	0.000445422	-0.0916895	0.623736	-0.304377	0.0170806
Innate Immune System	TLR1	0.00136953	0	0	0	5.01333e-05	-0.270131	0.00397076	-0.361091	0.00063634	-0.2577	0.161627	-0.195796	0.130469
Innate Immune System	CD86	0.00136953	0	0	1	5.09998e-05	-0.261385	0.00537296	-0.326505	0.00215406	-0.392407	0.029001	-0.181286	0.162048
Innate Immune System	PLCG2	0.00131792	0	0	1	4.66838e-05	-0.256919	0.00624695	-0.401708	0.000126297	-0.0838131	0.653962	-0.215839	0.0947939
Innate Immune System	CD14	0.00126667	0	0	1	4.18995e-05	-0.323766	0.000497199	-0.215872	0.0459099	-0.350601	0.0531464	-0.269904	0.0354115
Innate Immune System	CD33	0.00126667	0	0	1	4.36263e-05	-0.237986	0.0115117	-0.394151	0.000173389	-0.358817	0.047448	-0.0929599	0.476115
Innate Immune System	TYROBP	0.00126667	0	0	0	4.37179e-05	-0.315179	0.000712252	-0.214611	0.0472247	-0.360295	0.0464762	-0.279886	0.0289166
Innate Immune System	NLRC3	0.00121808	0	0	0	3.87217e-05	-0.227628	0.0157896	-0.397138	0.000153116	na	na	-0.198893	0.124375
Innate Immune System	ELMO1	0.000998892	0	0	0	3.08468e-05	-0.253068	0.00709939	-0.379968	0.000308038	-0.2577	0.161627	-0.222881	0.0842506
Innate Immune System	ITGB2	0.000829838	0	0	1	2.48725e-05	-0.300832	0.00126862	-0.296508	0.00556958	-0.345956	0.0566	-0.24446	0.0576023
Innate Immune System	WIPF1	0.000696071	0	0	0	2.02309e-05	-0.248024	0.00837111	-0.416498	6.64202e-05	na	na	-0.146999	0.258265
Innate Immune System	RNASE6	0.000632945	0	0	0	1.78213e-05	-0.273083	0.00357745	-0.420821	5.47306e-05	-0.190852	0.303742	-0.146284	0.260613
Innate Immune System	LY86	0.000573359	0	0	0	1.43895e-05	-0.315833	0.000693258	-0.319792	0.00268675	-0.312261	0.0872272	-0.230401	0.0740379
Innate Immune System	PRKCQ	0.000573359	0	0	1	1.47931e-05	-0.266763	0.00446629	-0.362428	0.00060534	-0.336262	0.0643762	-0.232466	0.0714129
Innate Immune System	RASGRP2	0.000573359	0	0	0	1.55778e-05	-0.215662	0.0223899	-0.461362	7.79366e-06	0.0563523	0.763337	-0.213075	0.0992027
Innate Immune System	C1QB	0.000573359	0	0	1	1.55968e-05	-0.331001	0.00036425	-0.2318	0.0317529	-0.36797	0.0416839	-0.282401	0.0274478
Innate Immune System	CD19	0.000573359	0	0	1	1.56229e-05	-0.182697	0.0538484	-0.473696	4.09321e-06	0.0537212	0.774095	-0.227606	0.0777116
Innate Immune System	CD53	0.000470208	0	0	0	1.03004e-05	-0.275158	0.0033223	-0.390368	0.000202625	-0.221269	0.231602	-0.25002	0.0519791
Innate Immune System	C3AR1	0.000470208	0	0	1	1.06769e-05	-0.30014	0.00130347	-0.345761	0.00111129	-0.292841	0.109878	-0.248855	0.0531186
Innate Immune System	ITK	0.000446501	0	0	1	9.32745e-06	-0.212966	0.0241671	-0.472388	4.38781e-06	-0.132889	0.476056	-0.189838	0.142819
Innate Immune System	CD300A	0.000421598	0	0	0	7.60859e-06	-0.306331	0.00102027	-0.263438	0.0142568	-0.413411	0.0207951	-0.300167	0.0187552
Innate Immune System	C1QC	0.000421598	0	0	0	7.95472e-06	-0.348949	0.000162764	-0.212032	0.0500104	-0.350399	0.053293	-0.313829	0.01378
Innate Immune System	ITGAL	0.000421598	0	0	1	8.19408e-06	-0.260996	0.00544455	-0.428463	3.86195e-05	-0.200465	0.279565	-0.209405	0.105301
Innate Immune System	HVCN1	0.000421598	0	0	1	8.32987e-06	-0.264483	0.00483256	-0.393886	0.000175306	-0.318692	0.080573	-0.217348	0.0924521
Innate Immune System	GMFG	0.000421598	0	0	0	8.42429e-06	-0.252465	0.00724189	-0.421286	5.35955e-05	-0.193275	0.297527	-0.246605	0.0553776
Innate Immune System	IRF1	0.000421169	0	0	1	6.50306e-06	-0.281837	0.00260824	-0.390795	0.000199114	-0.32034	0.0789325	-0.203845	0.115087
Innate Immune System	NCKAP1L	0.000365242	0	0	0	5.30779e-06	-0.272124	0.00370112	-0.430738	3.47544e-05	-0.155105	0.404756	-0.232466	0.0714129
Innate Immune System	CD247	0.000225379	0	0	1	3.07057e-06	-0.250569	0.00770618	-0.483139	2.45751e-06	-0.0605878	0.74611	-0.191718	0.138831
Innate Immune System	CD3G	0.00016288	0	0	1	1.69657e-06	-0.285846	0.00224926	-0.43236	3.2224e-05	-0.11855	0.525311	-0.285261	0.0258546
Innate Immune System	GLIPR1	0.00016288	0	0	0	1.93455e-06	-0.283035	0.0024959	-0.448572	1.48087e-05	-0.282339	0.123829	-0.149408	0.250457
Innate Immune System	WAS	0.00016288	0	0	0	2.04646e-06	-0.288638	0.00202627	-0.435213	2.81827e-05	-0.180469	0.331287	-0.238056	0.0646794
Innate Immune System	CYFIP2	0.00016288	0	0	0	2.0475e-06	-0.294882	0.0015983	-0.453407	1.1653e-05	0.0167626	0.928684	-0.232969	0.0707849
Innate Immune System	IL2RB	0.00016288	0	0	1	2.07114e-06	-0.268676	0.00417846	-0.451179	1.30194e-05	-0.260326	0.157247	-0.188806	0.145046
Innate Immune System	GZMM	0.00014066	0	0	0	1.14981e-06	-0.327471	0.000424368	-0.348937	0.000992317	-0.146738	0.430868	-0.368689	0.00345856
Innate Immune System	CD4	0.000134429	0	0	1	5.94376e-07	-0.313716	0.000756445	-0.441091	2.13036e-05	-0.15773	0.396751	-0.256639	0.0458767
Innate Immune System	ARHGAP9	0.000134429	0	0	0	7.73772e-07	-0.250638	0.00768897	-0.470862	4.75668e-06	-0.336666	0.0640364	-0.178109	0.169657
Innate Immune System	C1QA	0.000134429	0	0	1	9.33439e-07	-0.318687	0.000615758	-0.362656	0.000600203	-0.406746	0.0231598	-0.244433	0.0576302
Innate Immune System	BTK	0.000134429	0	0	1	9.56104e-07	-0.259905	0.00564973	-0.497579	1.09309e-06	-0.139352	0.454669	-0.173714	0.180608
Innate Immune System	DOCK2	0.000134429	0	0	0	9.76775e-07	-0.262712	0.00513531	-0.463978	6.8126e-06	-0.256084	0.164365	-0.218698	0.0903954
Innate Immune System	FGL2	8.57065e-05	0	0	0	2.33533e-07	-0.31544	0.000704623	-0.44057	2.18436e-05	-0.342523	0.0592646	-0.206545	0.11025
Innate Immune System	TBC1D10C	2.53878e-05	0	0	0	4.10622e-08	-0.291788	0.00179884	-0.488743	1.80247e-06	-0.14945	0.422305	-0.326617	0.0101973
Innate Immune System	RASAL3	2.53878e-05	0	0	0	4.61178e-08	-0.287185	0.00213968	-0.488942	1.78254e-06	na	na	-0.259234	0.0436509
Interferon alpha/beta signaling	STAT2	0.0467448	0	0	1	0.00996201	-0.220256	0.0196188	-0.25755	0.0166655	-0.253863	0.168184	-0.0356377	0.785109
Interferon alpha/beta signaling	IFITM1	0.0383445	0	0	0	0.00754317	-0.196797	0.0375505	-0.243755	0.0237194	-0.328992	0.0707378	-0.0942573	0.469954
Interferon alpha/beta signaling	BST2	0.0377313	0	0	0	0.00631614	-0.261017	0.0054406	-0.137464	0.206899	-0.318894	0.0803705	-0.147131	0.257832
Interferon alpha/beta signaling	IRF8	0.0377313	0	0	0	0.00639846	-0.1961	0.0382458	-0.22321	0.038846	0.111683	0.54974	-0.279648	0.0290592
Interferon alpha/beta signaling	STAT1	0.0377313	0	0	1	0.006804	-0.221446	0.0189516	-0.152406	0.161252	-0.420479	0.0185084	-0.0973021	0.455665
Interferon alpha/beta signaling	HLA-E	0.0251644	0	0	0	0.00310031	-0.216748	0.0217061	-0.0683671	0.531666	-0.51439	0.0030717	-0.147449	0.256794
Interferon alpha/beta signaling	HLA-G	0.0251644	0	0	0	0.00327354	-0.22296	0.0181303	-0.158702	0.144436	-0.411997	0.0212793	-0.175779	0.1754
Interferon alpha/beta signaling	OAS2	0.0251644	0	0	0	0.00330025	-0.196699	0.037648	-0.22868	0.034191	-0.469555	0.00769788	0.000503059	0.99693
Interferon alpha/beta signaling	SAMHD1	0.0147312	1	0	0	0.00102396	-0.228304	0.0154734	-0.330762	0.00186757	-0.0874484	0.639941	-0.202071	0.118351
Interferon alpha/beta signaling	XAF1	0.0147312	0	0	0	0.00120748	-0.276921	0.00311852	-0.283509	0.00816454	na	na	-0.0585931	0.65376
Interferon alpha/beta signaling	IFIT3	0.0108213	0	0	0	0.000532196	-0.27704	0.00310509	-0.268491	0.012436	-0.305564	0.0945935	-0.145596	0.262887
Interferon alpha/beta signaling	GBP2	0.00298245	0	0	0	9.77854e-05	-0.258386	0.00594681	-0.342556	0.00124433	-0.370191	0.0403732	-0.109799	0.399582
Interferon alpha/beta signaling	IRF1	0.000396687	0	0	1	6.50306e-06	-0.281837	0.00260824	-0.390795	0.000199114	-0.32034	0.0789325	-0.203845	0.115087
Interferon gamma signaling	PTPN6	0.0497839	0	0	1	0.0165504	-0.187205	0.0481008	-0.139066	0.201605	-0.335656	0.0648886	-0.192009	0.138221
Interferon gamma signaling	IRF4	0.0497839	0	0	0	0.0167946	-0.149644	0.115302	-0.313582	0.00328183	0.0319096	0.86469	-0.14308	0.271312
Interferon gamma signaling	IFI30	0.0497839	0	0	0	0.0173551	-0.17013	0.0729118	-0.230482	0.0327645	-0.256084	0.164365	-0.153777	0.236713
Interferon gamma signaling	ICAM1	0.0497839	0	0	1	0.0173665	-0.190572	0.0441476	-0.132126	0.22525	-0.416642	0.0197224	-0.0933306	0.47435
Interferon gamma signaling	PTAFR	0.0450054	0	0	1	0.0136063	-0.177771	0.0607631	-0.295028	0.0058226	-0.0349531	0.85192	-0.159405	0.219783
Interferon gamma signaling	TRIM5	0.0367822	0	0	0	0.00990967	-0.0582259	0.541988	-0.355109	0.000793626	-0.195497	0.291901	0.123911	0.341386
Interferon gamma signaling	HLA-DRA	0.0367822	0	0	1	0.0103717	-0.21567	0.0223847	-0.244627	0.0232081	-0.166414	0.370925	-0.153777	0.236713
Interferon gamma signaling	CD44	0.0367822	0	0	1	0.0106925	-0.0714079	0.454347	-0.296517	0.00556823	-0.190852	0.303742	0.240515	0.0618834
Interferon gamma signaling	B2M	0.0343098	0	0	1	0.00877691	-0.274208	0.00343699	-0.162115	0.13589	-0.251566	0.172199	-0.0981229	0.451854
Interferon gamma signaling	GBP5	0.0305331	0	0	0	0.00745575	-0.190718	0.0439831	-0.214506	0.0473348	-0.305362	0.0948228	-0.187614	0.147647
Interferon gamma signaling	STAT1	0.0292572	0	0	1	0.006804	-0.221446	0.0189516	-0.152406	0.161252	-0.420479	0.0185084	-0.0973021	0.455665
Interferon gamma signaling	IRF8	0.0289614	0	0	0	0.00639846	-0.1961	0.0382458	-0.22321	0.038846	0.111683	0.54974	-0.279648	0.0290592
Interferon gamma signaling	HLA-DPA1	0.0247352	0	0	0	0.00517713	-0.219503	0.0200516	-0.270197	0.0118686	-0.119964	0.520347	-0.189071	0.144472
Interferon gamma signaling	CIITA	0.0179705	0	0	0	0.00355231	-0.195043	0.0393199	-0.337275	0.00149533	-0.168872	0.3638	-0.0862613	0.508601
Interferon gamma signaling	HLA-E	0.0177389	0	0	0	0.00310031	-0.216748	0.0217061	-0.0683671	0.531666	-0.51439	0.0030717	-0.147449	0.256794
Interferon gamma signaling	HLA-G	0.0177389	0	0	0	0.00327354	-0.22296	0.0181303	-0.158702	0.144436	-0.411997	0.0212793	-0.175779	0.1754
Interferon gamma signaling	OAS2	0.0177389	0	0	0	0.00330025	-0.196699	0.037648	-0.22868	0.034191	-0.469555	0.00769788	0.000503059	0.99693
Interferon gamma signaling	VCAM1	0.0133798	0	0	1	0.00202253	-0.178836	0.0592097	-0.369596	0.00046142	-0.0441326	0.813637	-0.15428	0.235164
Interferon gamma signaling	FCGR1B	0.0112013	0	0	0	0.00156297	-0.245572	0.00905877	-0.212714	0.0492602	na	na	-0.251185	0.0508595
Interferon gamma signaling	GBP1	0.00511933	0	0	0	0.000654798	-0.243827	0.00957827	-0.313317	0.00330971	-0.260527	0.156914	-0.149461	0.250287
Interferon gamma signaling	FCGR1A	0.00374213	0	0	1	0.000435132	-0.261394	0.00537139	-0.223911	0.038221	-0.363527	0.0444075	-0.224523	0.0819314
Interferon gamma signaling	HLA-DQB2	0.00323031	0	0	0	0.000338056	-0.283557	0.00244834	-0.299987	0.00501308	-0.126225	0.498646	-0.219492	0.0892024
Interferon gamma signaling	PML	0.00310305	0	0	1	0.000288656	-0.257308	0.00616604	-0.285405	0.00772976	-0.378674	0.0356699	-0.145225	0.264118
Interferon gamma signaling	HLA-DQA1	0.00182634	0	0	1	0.000148656	-0.248918	0.00813199	-0.313971	0.00324138	-0.319298	0.0799668	-0.216156	0.0942971
Interferon gamma signaling	HLA-DQA2	0.00140159	0	0	0	9.5639e-05	-0.321413	0.000549246	-0.173843	0.109427	na	na	-0.31277	0.0141202
Interferon gamma signaling	GBP2	0.00140159	0	0	0	9.77854e-05	-0.258386	0.00594681	-0.342556	0.00124433	-0.370191	0.0403732	-0.109799	0.399582
Interferon gamma signaling	GBP4	0.00100252	0	0	0	4.66288e-05	-0.256957	0.00623891	-0.393801	0.000175926	-0.173483	0.350653	-0.197596	0.1269
Interferon gamma signaling	HLA-DPB1	0.000296161	0	0	0	1.03312e-05	-0.246881	0.00868559	-0.438617	2.3982e-05	-0.196506	0.289366	-0.193598	0.134927
Interferon gamma signaling	IRF1	0.000279632	0	0	1	6.50306e-06	-0.281837	0.00260824	-0.390795	0.000199114	-0.32034	0.0789325	-0.203845	0.115087
Interferon gamma signaling	TRIM22	4.91791e-06	0	0	0	5.7185e-08	-0.30856	0.000932919	-0.452317	1.23039e-05	-0.469757	0.00766812	-0.155736	0.23072
Interferon Signaling	GBP5	0.0487612	0	0	0	0.00745575	-0.190718	0.0439831	-0.214506	0.0473348	-0.305362	0.0948228	-0.187614	0.147647
Interferon Signaling	IFITM1	0.0487612	0	0	0	0.00754317	-0.196797	0.0375505	-0.243755	0.0237194	-0.328992	0.0707378	-0.0942573	0.469954
Interferon Signaling	STAT1	0.0473663	0	0	1	0.006804	-0.221446	0.0189516	-0.152406	0.161252	-0.420479	0.0185084	-0.0973021	0.455665
Interferon Signaling	BST2	0.0463248	0	0	0	0.00631614	-0.261017	0.0054406	-0.137464	0.206899	-0.318894	0.0803705	-0.147131	0.257832
Interferon Signaling	IRF8	0.0463248	0	0	0	0.00639846	-0.1961	0.0382458	-0.22321	0.038846	0.111683	0.54974	-0.279648	0.0290592
Interferon Signaling	HLA-DPA1	0.0407417	0	0	0	0.00517713	-0.219503	0.0200516	-0.270197	0.0118686	-0.119964	0.520347	-0.189071	0.144472
Interferon Signaling	CIITA	0.0305656	0	0	0	0.00355231	-0.195043	0.0393199	-0.337275	0.00149533	-0.168872	0.3638	-0.0862613	0.508601
Interferon Signaling	UBE2L6	0.0305656	0	0	0	0.00371515	-0.23746	0.0117016	-0.152027	0.162309	-0.441685	0.0128622	-0.0937542	0.472338
Interferon Signaling	HLA-E	0.0298673	0	0	0	0.00310031	-0.216748	0.0217061	-0.0683671	0.531666	-0.51439	0.0030717	-0.147449	0.256794
Interferon Signaling	HLA-G	0.0298673	0	0	0	0.00327354	-0.22296	0.0181303	-0.158702	0.144436	-0.411997	0.0212793	-0.175779	0.1754
Interferon Signaling	OAS2	0.0298673	0	0	0	0.00330025	-0.196699	0.037648	-0.22868	0.034191	-0.469555	0.00769788	0.000503059	0.99693
Interferon Signaling	VCAM1	0.021534	0	0	1	0.00202253	-0.178836	0.0592097	-0.369596	0.00046142	-0.0441326	0.813637	-0.15428	0.235164
Interferon Signaling	FCGR1B	0.0176811	0	0	0	0.00156297	-0.245572	0.00905877	-0.212714	0.0492602	na	na	-0.251185	0.0508595
Interferon Signaling	XAF1	0.0145702	0	0	0	0.00120748	-0.276921	0.00311852	-0.283509	0.00816454	na	na	-0.0585931	0.65376
Interferon Signaling	SAMHD1	0.0132383	1	0	0	0.00102396	-0.228304	0.0154734	-0.330762	0.00186757	-0.0874484	0.639941	-0.202071	0.118351
Interferon Signaling	GBP1	0.0091168	0	0	0	0.000654798	-0.243827	0.00957827	-0.313317	0.00330971	-0.260527	0.156914	-0.149461	0.250287
Interferon Signaling	IFIT3	0.00802729	0	0	0	0.000532196	-0.27704	0.00310509	-0.268491	0.012436	-0.305564	0.0945935	-0.145596	0.262887
Interferon Signaling	FCGR1A	0.00715989	0	0	1	0.000435132	-0.261394	0.00537139	-0.223911	0.038221	-0.363527	0.0444075	-0.224523	0.0819314
Interferon Signaling	HLA-DQB2	0.00611882	0	0	0	0.000338056	-0.283557	0.00244834	-0.299987	0.00501308	-0.126225	0.498646	-0.219492	0.0892024
Interferon Signaling	PML	0.00580519	0	0	1	0.000288656	-0.257308	0.00616604	-0.285405	0.00772976	-0.378674	0.0356699	-0.145225	0.264118
Interferon Signaling	HLA-DQA1	0.0037674	0	0	1	0.000148656	-0.248918	0.00813199	-0.313971	0.00324138	-0.319298	0.0799668	-0.216156	0.0942971
Interferon Signaling	UBA7	0.0037674	0	0	0	0.000166515	-0.211379	0.0252689	-0.394132	0.000173525	na	na	-0.117371	0.367665
Interferon Signaling	HLA-DQA2	0.00294986	0	0	0	9.5639e-05	-0.321413	0.000549246	-0.173843	0.109427	na	na	-0.31277	0.0141202
Interferon Signaling	GBP2	0.00294986	0	0	0	9.77854e-05	-0.258386	0.00594681	-0.342556	0.00124433	-0.370191	0.0403732	-0.109799	0.399582
Interferon Signaling	GBP4	0.00210995	0	0	0	4.66288e-05	-0.256957	0.00623891	-0.393801	0.000175926	-0.173483	0.350653	-0.197596	0.1269
Interferon Signaling	HLA-DPB1	0.000623315	0	0	0	1.03312e-05	-0.246881	0.00868559	-0.438617	2.3982e-05	-0.196506	0.289366	-0.193598	0.134927
Interferon Signaling	IRF1	0.000588527	0	0	1	6.50306e-06	-0.281837	0.00260824	-0.390795	0.000199114	-0.32034	0.0789325	-0.203845	0.115087
Interferon Signaling	TRIM22	1.03505e-05	0	0	0	5.7185e-08	-0.30856	0.000932919	-0.452317	1.23039e-05	-0.469757	0.00766812	-0.155736	0.23072
Interleukin-12 signaling	IL12B	0.0494777	0	0	1	0.0247389	-0.236173	0.0121776	-0.123367	0.257783	-0.00859194	0.963412	-0.25132	0.0507315
Interleukin-12 signaling	IL12RB1	0.00439298	0	0	0	0.00109825	-0.238123	0.0114627	-0.303931	0.00444223	-0.175907	0.343859	-0.192777	0.136621
Neutrophil degranulation	STK10	0.0469875	0	0	1	0.0047838	-0.216983	0.0215604	-0.304376	0.00438152	-0.162493	0.382463	-0.0994203	0.445866
Neutrophil degranulation	CHI3L1	0.0388868	0	0	1	0.00387108	-0.163768	0.0844593	-0.177863	0.101341	-0.498234	0.00433794	-0.127353	0.328038
Neutrophil degranulation	DEFA4	0.0388421	0	0	1	0.00377876	0.320622	0.000567825	-0.0467459	0.669093	-0.361352	0.0457918	-0.0542064	0.678206
Neutrophil degranulation	MAPK14	0.0342433	0	0	1	0.00325389	0.216166	0.0220701	0.327538	0.0020811	0.154095	0.407859	0.0844344	0.517653
Neutrophil degranulation	FCER1G	0.0313083	0	0	1	0.00290416	-0.237944	0.011527	-0.185096	0.0879759	-0.382309	0.0337947	-0.151474	0.243893
Neutrophil degranulation	CFP	0.0309645	0	0	0	0.00280222	-0.22222	0.0185277	-0.155677	0.152342	-0.0480663	0.797354	-0.367789	0.00354491
Neutrophil degranulation	AP1M1	0.0260689	0	0	0	0.00224784	-0.239	0.0111533	-0.323708	0.00236323	-0.0252449	0.892768	-0.148111	0.254641
Neutrophil degranulation	TNFRSF1B	0.0260689	0	0	1	0.0023002	-0.200879	0.0336907	-0.316398	0.00299876	0.0450369	0.809887	-0.229315	0.0754482
Neutrophil degranulation	SIGLEC5	0.019575	0	0	0	0.00163863	-0.281644	0.00262672	-0.076132	0.485991	-0.268202	0.14462	-0.293707	0.0215965
Neutrophil degranulation	SIGLEC9	0.01924	0	0	0	0.00156706	-0.268826	0.00415664	-0.0824653	0.45034	-0.387964	0.031037	-0.237947	0.0648057
Neutrophil degranulation	LTF	0.0135496	0	0	1	0.00107293	-0.221489	0.0189279	-0.272956	0.0109989	na	na	-0.234081	0.0694123
Neutrophil degranulation	ITGAX	0.0135264	0	0	1	0.0010405	-0.229513	0.0149214	-0.266852	0.013003	-0.38857	0.0307527	-0.115756	0.374339
Neutrophil degranulation	FGR	0.0128538	0	0	1	0.000959673	-0.186088	0.0494749	-0.273535	0.0108238	-0.430779	0.0155525	-0.152056	0.242064
Neutrophil degranulation	C16ORF62	0.011191	0	0	0	0.000810207	-0.21164	0.0250845	-0.359498	0.000675167	na	na	-0.066537	0.610412
Neutrophil degranulation	SELL	0.00959534	0	0	1	0.000672327	-0.191599	0.0429973	-0.373758	0.000392984	-0.163789	0.378626	-0.165956	0.201168
Neutrophil degranulation	CD68	0.00959534	0	0	0	0.000672976	-0.283082	0.00249158	-0.179787	0.0976395	-0.171801	0.355416	-0.310414	0.0149031
Neutrophil degranulation	TRPM2	0.00655168	0	0	1	0.000429861	0.240708	0.010572	0.331075	0.00184794	0.328386	0.0712892	0.0823163	0.528249
Neutrophil degranulation	MNDA	0.00568567	0	0	0	0.000360178	-0.236994	0.0118722	-0.310548	0.00361335	-0.338282	0.062691	-0.15947	0.219596
Neutrophil degranulation	LILRB2	0.00466452	0	0	0	0.000284937	-0.257946	0.00603556	-0.272312	0.011197	-0.212259	0.251644	-0.285022	0.0259843
Neutrophil degranulation	LAIR1	0.00446019	0	0	0	0.000262364	-0.323809	0.000496296	-0.0939372	0.389627	-0.316066	0.0832407	-0.287246	0.0247947
Neutrophil degranulation	PTPRC	0.00415475	0	0	1	0.000231876	-0.216414	0.0219142	-0.383106	0.000271863	-0.244169	0.185587	-0.132146	0.310011
Neutrophil degranulation	PLEKHO2	0.00415475	0	0	0	0.000234997	-0.234478	0.0128305	-0.350662	0.000932649	na	na	-0.165956	0.201168
Neutrophil degranulation	CD36	0.00302501	0	0	1	0.00015741	-0.248323	0.00829034	-0.387344	0.0002292	-0.133091	0.47538	-0.154015	0.235978
Neutrophil degranulation	CECR1	0.00275148	0	0	0	0.000136952	-0.223649	0.0177671	-0.406514	0.000102828	-0.143795	0.440269	-0.158119	0.223575
Neutrophil degranulation	CYBB	0.00264918	0	0	0	0.000118131	-0.247065	0.00863425	-0.349667	0.000966662	-0.338888	0.0621922	-0.137865	0.289349
Neutrophil degranulation	CLEC12A	0.00264918	0	0	0	0.000118416	-0.212087	0.024772	-0.355346	0.000786775	-0.294861	0.107336	-0.231994	0.0720067
Neutrophil degranulation	LRMP	0.00264918	0	0	0	0.000123561	-0.200661	0.0338882	-0.443936	1.85711e-05	-0.0553368	0.767484	-0.127247	0.328444
Neutrophil degranulation	ATP8B4	0.00264918	0	0	0	0.000125866	-0.200195	0.0343137	-0.409653	8.97616e-05	-0.269616	0.142434	-0.116842	0.369846
Neutrophil degranulation	C3	0.0016905	0	0	1	6.50194e-05	-0.302104	0.00120668	-0.268832	0.0123207	na	na	-0.268226	0.036614
Neutrophil degranulation	CD14	0.00120771	0	0	1	4.18995e-05	-0.323766	0.000497199	-0.215872	0.0459099	-0.350601	0.0531464	-0.269904	0.0354115
Neutrophil degranulation	CD33	0.00120771	0	0	1	4.36263e-05	-0.237986	0.0115117	-0.394151	0.000173389	-0.358817	0.047448	-0.0929599	0.476115
Neutrophil degranulation	TYROBP	0.00120771	0	0	0	4.37179e-05	-0.315179	0.000712252	-0.214611	0.0472247	-0.360295	0.0464762	-0.279886	0.0289166
Neutrophil degranulation	ITGB2	0.000845666	0	0	1	2.48725e-05	-0.300832	0.00126862	-0.296508	0.00556958	-0.345956	0.0566	-0.24446	0.0576023
Neutrophil degranulation	CD53	0.000393264	0	0	0	1.03004e-05	-0.275158	0.0033223	-0.390368	0.000202625	-0.221269	0.231602	-0.25002	0.0519791
Neutrophil degranulation	C3AR1	0.000393264	0	0	1	1.06769e-05	-0.30014	0.00130347	-0.345761	0.00111129	-0.292841	0.109878	-0.248855	0.0531186
Neutrophil degranulation	NCKAP1L	0.000372354	0	0	0	5.30779e-06	-0.272124	0.00370112	-0.430738	3.47544e-05	-0.155105	0.404756	-0.232466	0.0714129
Neutrophil degranulation	CD300A	0.000372354	0	0	0	7.60859e-06	-0.306331	0.00102027	-0.263438	0.0142568	-0.413411	0.0207951	-0.300167	0.0187552
Neutrophil degranulation	ITGAL	0.000372354	0	0	1	8.19408e-06	-0.260996	0.00544455	-0.428463	3.86195e-05	-0.200465	0.279565	-0.209405	0.105301
Neutrophil degranulation	HVCN1	0.000372354	0	0	1	8.32987e-06	-0.264483	0.00483256	-0.393886	0.000175306	-0.318692	0.080573	-0.217348	0.0924521
Neutrophil degranulation	GMFG	0.000372354	0	0	0	8.42429e-06	-0.252465	0.00724189	-0.421286	5.35955e-05	-0.193275	0.297527	-0.246605	0.0553776
Neutrophil degranulation	GLIPR1	0.000171015	0	0	0	1.93455e-06	-0.283035	0.0024959	-0.448572	1.48087e-05	-0.282339	0.123829	-0.149408	0.250457
Neutrophil degranulation	ARHGAP9	0.000107934	0	0	0	7.73772e-07	-0.250638	0.00768897	-0.470862	4.75668e-06	-0.336666	0.0640364	-0.178109	0.169657
Neutrophil degranulation	DOCK2	0.000107934	0	0	0	9.76775e-07	-0.262712	0.00513531	-0.463978	6.8126e-06	-0.256084	0.164365	-0.218698	0.0903954
Neutrophil degranulation	FGL2	5.16107e-05	0	0	0	2.33533e-07	-0.31544	0.000704623	-0.44057	2.18436e-05	-0.342523	0.0592646	-0.206545	0.11025
Neutrophil degranulation	TBC1D10C	1.81495e-05	0	0	0	4.10622e-08	-0.291788	0.00179884	-0.488743	1.80247e-06	-0.14945	0.422305	-0.326617	0.0101973
PD-1 signaling	HLA-DQB1	0.0368677	0	0	0	0.0258074	-0.149144	0.116538	-0.229733	0.0333514	-0.296274	0.105583	-0.110355	0.397184
PD-1 signaling	PTPN6	0.0254621	0	0	1	0.0165504	-0.187205	0.0481008	-0.139066	0.201605	-0.335656	0.0648886	-0.192009	0.138221
PD-1 signaling	HLA-DRA	0.0172862	0	0	1	0.0103717	-0.21567	0.0223847	-0.244627	0.0232081	-0.166414	0.370925	-0.153777	0.236713
PD-1 signaling	PDCD1LG2	0.0157564	0	0	1	0.00866605	-0.222162	0.0185592	-0.261816	0.0148879	0.0464506	0.804032	-0.181826	0.160782
PD-1 signaling	HLA-DPA1	0.0103543	0	0	0	0.00517713	-0.219503	0.0200516	-0.270197	0.0118686	-0.119964	0.520347	-0.189071	0.144472
PD-1 signaling	HLA-DQB2	0.000751236	0	0	0	0.000338056	-0.283557	0.00244834	-0.299987	0.00501308	-0.126225	0.498646	-0.219492	0.0892024
PD-1 signaling	HLA-DQA1	0.000371639	0	0	1	0.000148656	-0.248918	0.00813199	-0.313971	0.00324138	-0.319298	0.0799668	-0.216156	0.0942971
PD-1 signaling	HLA-DQA2	0.000273254	0	0	0	9.5639e-05	-0.321413	0.000549246	-0.173843	0.109427	na	na	-0.31277	0.0141202
PD-1 signaling	HLA-DPB1	3.44373e-05	0	0	0	1.03312e-05	-0.246881	0.00868559	-0.438617	2.3982e-05	-0.196506	0.289366	-0.193598	0.134927
PD-1 signaling	CD3E	2.06898e-05	0	0	1	5.17245e-06	-0.279809	0.00280885	-0.417617	6.31909e-05	-0.20822	0.26099	-0.227488	0.0778698
PD-1 signaling	CD3G	1.53528e-05	0	0	1	1.69657e-06	-0.285846	0.00224926	-0.43236	3.2224e-05	-0.11855	0.525311	-0.285261	0.0258546
PD-1 signaling	CD3D	1.53528e-05	0	0	1	2.92435e-06	-0.24858	0.00822166	-0.485586	2.14791e-06	-0.0931126	0.618336	-0.178083	0.169721
PD-1 signaling	CD247	1.53528e-05	0	0	1	3.07057e-06	-0.250569	0.00770618	-0.483139	2.45751e-06	-0.0605878	0.74611	-0.191718	0.138831
PD-1 signaling	CD4	1.18875e-05	0	0	1	5.94376e-07	-0.313716	0.000756445	-0.441091	2.13036e-05	-0.15773	0.396751	-0.256639	0.0458767
Phosphorylation of CD3 and TCR zeta chains	HLA-DQB1	0.0350243	0	0	0	0.0258074	-0.149144	0.116538	-0.229733	0.0333514	-0.296274	0.105583	-0.110355	0.397184
Phosphorylation of CD3 and TCR zeta chains	HLA-DRA	0.0151587	0	0	1	0.0103717	-0.21567	0.0223847	-0.244627	0.0232081	-0.166414	0.370925	-0.153777	0.236713
Phosphorylation of CD3 and TCR zeta chains	HLA-DPA1	0.00819712	0	0	0	0.00517713	-0.219503	0.0200516	-0.270197	0.0118686	-0.119964	0.520347	-0.189071	0.144472
Phosphorylation of CD3 and TCR zeta chains	PTPN22	0.00133626	0	0	0	0.000773626	-0.211374	0.0252719	-0.377067	0.000345366	-0.108048	0.562884	-0.131457	0.312561
Phosphorylation of CD3 and TCR zeta chains	HLA-DQB2	0.000642307	0	0	0	0.000338056	-0.283557	0.00244834	-0.299987	0.00501308	-0.126225	0.498646	-0.219492	0.0892024
Phosphorylation of CD3 and TCR zeta chains	PTPRC	0.000489517	0	0	1	0.000231876	-0.216414	0.0219142	-0.383106	0.000271863	-0.244169	0.185587	-0.132146	0.310011
Phosphorylation of CD3 and TCR zeta chains	HLA-DQA1	0.000353057	0	0	1	0.000148656	-0.248918	0.00813199	-0.313971	0.00324138	-0.319298	0.0799668	-0.216156	0.0942971
Phosphorylation of CD3 and TCR zeta chains	HLA-DQA2	0.000259592	0	0	0	9.5639e-05	-0.321413	0.000549246	-0.173843	0.109427	na	na	-0.31277	0.0141202
Phosphorylation of CD3 and TCR zeta chains	HLA-DPB1	3.27154e-05	0	0	0	1.03312e-05	-0.246881	0.00868559	-0.438617	2.3982e-05	-0.196506	0.289366	-0.193598	0.134927
Phosphorylation of CD3 and TCR zeta chains	CD3E	1.96553e-05	0	0	1	5.17245e-06	-0.279809	0.00280885	-0.417617	6.31909e-05	-0.20822	0.26099	-0.227488	0.0778698
Phosphorylation of CD3 and TCR zeta chains	CD3G	1.45852e-05	0	0	1	1.69657e-06	-0.285846	0.00224926	-0.43236	3.2224e-05	-0.11855	0.525311	-0.285261	0.0258546
Phosphorylation of CD3 and TCR zeta chains	CD3D	1.45852e-05	0	0	1	2.92435e-06	-0.24858	0.00822166	-0.485586	2.14791e-06	-0.0931126	0.618336	-0.178083	0.169721
Phosphorylation of CD3 and TCR zeta chains	CD247	1.45852e-05	0	0	1	3.07057e-06	-0.250569	0.00770618	-0.483139	2.45751e-06	-0.0605878	0.74611	-0.191718	0.138831
Phosphorylation of CD3 and TCR zeta chains	CD4	1.12931e-05	0	0	1	5.94376e-07	-0.313716	0.000756445	-0.441091	2.13036e-05	-0.15773	0.396751	-0.256639	0.0458767
Regulation of actin dynamics for phagocytic cup formation	FCGR1A	0.00256728	0	0	1	0.000435132	-0.261394	0.00537139	-0.223911	0.038221	-0.363527	0.0444075	-0.224523	0.0819314
Regulation of actin dynamics for phagocytic cup formation	VAV1	0.000806922	0	0	1	0.00012309	-0.227008	0.0160848	-0.366372	0.000521745	-0.264567	0.150353	-0.198496	0.125144
Regulation of actin dynamics for phagocytic cup formation	ELMO1	0.000227495	0	0	0	3.08468e-05	-0.253068	0.00709939	-0.379968	0.000308038	-0.2577	0.161627	-0.222881	0.0842506
Regulation of actin dynamics for phagocytic cup formation	WIPF1	0.000170518	0	0	0	2.02309e-05	-0.248024	0.00837111	-0.416498	6.64202e-05	na	na	-0.146999	0.258265
Regulation of actin dynamics for phagocytic cup formation	NCKAP1L	5.21933e-05	0	0	0	5.30779e-06	-0.272124	0.00370112	-0.430738	3.47544e-05	-0.155105	0.404756	-0.232466	0.0714129
Regulation of actin dynamics for phagocytic cup formation	CD247	3.62327e-05	0	0	1	3.07057e-06	-0.250569	0.00770618	-0.483139	2.45751e-06	-0.0605878	0.74611	-0.191718	0.138831
Regulation of actin dynamics for phagocytic cup formation	BTK	3.02006e-05	0	0	1	9.56104e-07	-0.259905	0.00564973	-0.497579	1.09309e-06	-0.139352	0.454669	-0.173714	0.180608
Regulation of actin dynamics for phagocytic cup formation	CD3G	3.02006e-05	0	0	1	1.69657e-06	-0.285846	0.00224926	-0.43236	3.2224e-05	-0.11855	0.525311	-0.285261	0.0258546
Regulation of actin dynamics for phagocytic cup formation	WAS	3.02006e-05	0	0	0	2.04646e-06	-0.288638	0.00202627	-0.435213	2.81827e-05	-0.180469	0.331287	-0.238056	0.0646794
Regulation of actin dynamics for phagocytic cup formation	CYFIP2	3.02006e-05	0	0	0	2.0475e-06	-0.294882	0.0015983	-0.453407	1.1653e-05	0.0167626	0.928684	-0.232969	0.0707849
Role of phospholipids in phagocytosis	PIK3R1	0.0140899	0	0	1	0.00410956	-0.192326	0.0421977	-0.349325	0.00097858	-0.0107038	0.954427	-0.125712	0.334362
Role of phospholipids in phagocytosis	ITPR1	0.00427265	0	0	1	0.00106816	-0.196549	0.0377967	-0.327443	0.0020877	-0.295063	0.107084	-0.142498	0.273288
Role of phospholipids in phagocytosis	FCGR1A	0.00208863	0	0	1	0.000435132	-0.261394	0.00537139	-0.223911	0.038221	-0.363527	0.0444075	-0.224523	0.0819314
Role of phospholipids in phagocytosis	PLD4	0.000602469	0	0	0	0.000100411	-0.316479	0.000674969	-0.127822	0.240858	-0.385742	0.0320977	-0.289523	0.0236246
Role of phospholipids in phagocytosis	PLCG2	0.000373471	0	0	1	4.66838e-05	-0.256919	0.00624695	-0.401708	0.000126297	-0.0838131	0.653962	-0.215839	0.0947939
Role of phospholipids in phagocytosis	CD3G	3.68468e-05	0	0	1	1.69657e-06	-0.285846	0.00224926	-0.43236	3.2224e-05	-0.11855	0.525311	-0.285261	0.0258546
Role of phospholipids in phagocytosis	CD247	3.68468e-05	0	0	1	3.07057e-06	-0.250569	0.00770618	-0.483139	2.45751e-06	-0.0605878	0.74611	-0.191718	0.138831
STAT6-mediated induction of chemokines	STAT6	0.0470847	0	0	1	0.0313898	-0.118972	0.21152	-0.29115	0.00653421	-0.24639	0.181492	0.0227965	0.861562
STAT6-mediated induction of chemokines	TMEM173	0.0320588	0	0	1	0.0106863	-0.207703	0.0279855	-0.275658	0.0102015	na	na	0.0244381	0.851703
TCR signaling	PSMB9	0.0469067	0	0	1	0.0108891	-0.22634	0.0164077	-0.164371	0.130453	-0.299708	0.101415	-0.157775	0.224598
TCR signaling	HLA-DRA	0.0464653	0	0	1	0.0103717	-0.21567	0.0223847	-0.244627	0.0232081	-0.166414	0.370925	-0.153777	0.236713
TCR signaling	HLA-DPA1	0.0241599	0	0	0	0.00517713	-0.219503	0.0200516	-0.270197	0.0118686	-0.119964	0.520347	-0.189071	0.144472
TCR signaling	TRAT1	0.0213683	0	0	0	0.00438813	-0.198736	0.0356739	-0.318882	0.00276743	-0.146622	0.431235	-0.124897	0.337528
TCR signaling	PIK3R1	0.0209214	0	0	1	0.00410956	-0.192326	0.0421977	-0.349325	0.00097858	-0.0107038	0.954427	-0.125712	0.334362
TCR signaling	LAT	0.011914	0	0	0	0.00223388	-0.180911	0.0562762	-0.258157	0.016402	-0.237302	0.198652	-0.274299	0.032416
TCR signaling	PTPN22	0.00433231	0	0	0	0.000773626	-0.211374	0.0252719	-0.377067	0.000345366	-0.108048	0.562884	-0.131457	0.312561
TCR signaling	SKP1	0.00253377	0	0	0	0.000429836	-0.315175	0.000712378	-0.270529	0.0117609	na	na	-0.0716991	0.58293
TCR signaling	HLA-DQB2	0.00228044	0	0	0	0.000338056	-0.283557	0.00244834	-0.299987	0.00501308	-0.126225	0.498646	-0.219492	0.0892024
TCR signaling	LCP2	0.00228044	0	0	0	0.000357466	-0.258643	0.00589564	-0.296365	0.00559369	-0.308998	0.0907598	-0.168048	0.195468
TCR signaling	GRAP2	0.00228044	0	0	0	0.000366499	-0.263401	0.00501562	-0.342613	0.00124184	0.0304959	0.870634	-0.205963	0.11128
TCR signaling	PSMB10	0.00203256	0	0	1	0.000272218	-0.261296	0.0053894	-0.274891	0.0104228	-0.308594	0.0912045	-0.224814	0.0815252
TCR signaling	PTPRC	0.00185501	0	0	1	0.000231876	-0.216414	0.0219142	-0.383106	0.000271863	-0.244169	0.185587	-0.132146	0.310011
TCR signaling	HLA-DQA1	0.00128072	0	0	1	0.000148656	-0.248918	0.00813199	-0.313971	0.00324138	-0.319298	0.0799668	-0.216156	0.0942971
TCR signaling	HLA-DQA2	0.000892631	0	0	0	9.5639e-05	-0.321413	0.000549246	-0.173843	0.109427	na	na	-0.31277	0.0141202
TCR signaling	PRKCQ	0.000150621	0	0	1	1.47931e-05	-0.266763	0.00446629	-0.362428	0.00060534	-0.336262	0.0643762	-0.232466	0.0714129
TCR signaling	FYB	0.000115709	0	0	0	8.7933e-06	-0.289983	0.00192617	-0.396616	0.00015649	-0.344341	0.0578419	-0.113029	0.385773
TCR signaling	ITK	0.000115709	0	0	1	9.32745e-06	-0.212966	0.0241671	-0.472388	4.38781e-06	-0.132889	0.476056	-0.189838	0.142819
TCR signaling	HLA-DPB1	0.000115709	0	0	0	1.03312e-05	-0.246881	0.00868559	-0.438617	2.3982e-05	-0.196506	0.289366	-0.193598	0.134927
TCR signaling	CD3E	8.27592e-05	0	0	1	5.17245e-06	-0.279809	0.00280885	-0.417617	6.31909e-05	-0.20822	0.26099	-0.227488	0.0778698
TCR signaling	CD3D	5.73172e-05	0	0	1	2.92435e-06	-0.24858	0.00822166	-0.485586	2.14791e-06	-0.0931126	0.618336	-0.178083	0.169721
TCR signaling	CD247	5.73172e-05	0	0	1	3.07057e-06	-0.250569	0.00770618	-0.483139	2.45751e-06	-0.0605878	0.74611	-0.191718	0.138831
TCR signaling	CD3G	5.73009e-05	0	0	1	1.69657e-06	-0.285846	0.00224926	-0.43236	3.2224e-05	-0.11855	0.525311	-0.285261	0.0258546
TCR signaling	WAS	5.73009e-05	0	0	0	2.04646e-06	-0.288638	0.00202627	-0.435213	2.81827e-05	-0.180469	0.331287	-0.238056	0.0646794
TCR signaling	CD4	4.15264e-05	0	0	1	5.94376e-07	-0.313716	0.000756445	-0.441091	2.13036e-05	-0.15773	0.396751	-0.256639	0.0458767
TCR signaling	EVL	4.15264e-05	0	0	0	7.41543e-07	-0.278097	0.00298883	-0.466737	5.90453e-06	-0.3092	0.090538	-0.153751	0.236794
The AIM2 inflammasome	AIM2	0.000837396	0	0	0	0.000558264	-0.152665	0.108063	-0.323035	0.00241623	-0.470565	0.00755006	-0.0845403	0.517126
The AIM2 inflammasome	CASP1	0.00083539	0	0	1	0.000278463	-0.229832	0.014779	-0.348776	0.000998064	-0.283753	0.121878	-0.153062	0.238925
The IPAF inflammasome	NLRC4	0.00453923	0	0	0	0.00453923	-0.200811	0.0337526	-0.259693	0.0157511	na	na	-0.183616	0.15663
The IPAF inflammasome	CASP1	0.000556926	0	0	1	0.000278463	-0.229832	0.014779	-0.348776	0.000998064	-0.283753	0.121878	-0.153062	0.238925
The NLRP3 inflammasome	PSTPIP1	0.002392	0	0	0	0.000797332	-0.195026	0.0393375	-0.324808	0.0022789	-0.20923	0.258633	-0.234584	0.0687984
The NLRP3 inflammasome	CASP1	0.00189043	0	0	1	0.000278463	-0.229832	0.014779	-0.348776	0.000998064	-0.283753	0.121878	-0.153062	0.238925
The NLRP3 inflammasome	NLRP3	0.00189043	0	0	1	0.000358359	-0.248802	0.00816254	-0.293843	0.00603243	na	na	-0.225847	0.080098
The NLRP3 inflammasome	P2RX7	0.00189043	0	0	1	0.000472607	-0.252037	0.00734447	-0.262689	0.0145454	-0.356862	0.0487576	-0.18261	0.158953
TNF receptor superfamily (TNFSF) members mediating non-canonical NF-kB pathway	CD40LG	0.000323636	0	0	1	0.000121364	-0.241576	0.0102866	-0.322267	0.00247799	0.247955	0.178646	-0.27181	0.0340851
TNF receptor superfamily (TNFSF) members mediating non-canonical NF-kB pathway	CD40	0.000202966	0	0	1	6.3427e-05	-0.280147	0.00277448	-0.319916	0.00267599	-0.355448	0.0497225	-0.169504	0.191568
TNF receptor superfamily (TNFSF) members mediating non-canonical NF-kB pathway	LTB	0.000114223	0	0	1	2.85556e-05	-0.181348	0.0556747	-0.474493	3.92312e-06	-0.113703	0.5425	-0.156239	0.229199
TNF receptor superfamily (TNFSF) members mediating non-canonical NF-kB pathway	LTA	8.67418e-05	0	0	1	1.31645e-05	-0.312376	0.000799077	-0.348282	0.00101583	-0.090294	0.62905	-0.294554	0.0212042
TNF receptor superfamily (TNFSF) members mediating non-canonical NF-kB pathway	TNFSF13B	8.67418e-05	0	0	1	1.62641e-05	-0.321096	0.000556619	-0.32203	0.00249733	-0.268606	0.143993	-0.234028	0.0694772
TNF receptor superfamily (TNFSF) members mediating non-canonical NF-kB pathway	TNFSF14	8.60729e-06	0	0	1	5.37955e-07	-0.316236	0.000681811	-0.371975	0.000421063	-0.342927	0.0589461	-0.308813	0.0154559
TNFR2 non-canonical NF-kB pathway	TNFRSF4	0.0468776	0	0	1	0.0066968	-0.22462	0.0172657	-0.215843	0.0459392	-0.145815	0.433806	-0.230957	0.0733238
TNFR2 non-canonical NF-kB pathway	TNFSF18	0.0233297	0	0	0	0.00309476	-0.252429	0.00725033	-0.14363	0.18706	0.145815	0.433806	-0.30887	0.015436
TNFR2 non-canonical NF-kB pathway	TNFRSF1B	0.0187849	0	0	1	0.0023002	-0.200879	0.0336907	-0.316398	0.00299876	0.0450369	0.809887	-0.229315	0.0754482
TNFR2 non-canonical NF-kB pathway	TNFRSF17	0.00844505	0	0	1	0.000947914	-0.110603	0.245662	-0.43289	3.14334e-05	0.0977483	0.600884	-0.103405	0.427752
TNFR2 non-canonical NF-kB pathway	SKP1	0.00421239	0	0	0	0.000429836	-0.315175	0.000712378	-0.270529	0.0117609	na	na	-0.0716991	0.58293
TNFR2 non-canonical NF-kB pathway	PSMB10	0.00296415	0	0	1	0.000272218	-0.261296	0.0053894	-0.274891	0.0104228	-0.308594	0.0912045	-0.224814	0.0815252
TNFR2 non-canonical NF-kB pathway	TNFRSF13B	0.00211514	0	0	1	0.000172665	-0.188409	0.0466549	-0.412127	8.0563e-05	0.0699061	0.70864	-0.219217	0.0896154
TNFR2 non-canonical NF-kB pathway	CD40LG	0.00169909	0	0	1	0.000121364	-0.241576	0.0102866	-0.322267	0.00247799	0.247955	0.178646	-0.27181	0.0340851
TNFR2 non-canonical NF-kB pathway	CD40	0.00103597	0	0	1	6.3427e-05	-0.280147	0.00277448	-0.319916	0.00267599	-0.355448	0.0497225	-0.169504	0.191568
TNFR2 non-canonical NF-kB pathway	LTB	0.00055969	0	0	1	2.85556e-05	-0.181348	0.0556747	-0.474493	3.92312e-06	-0.113703	0.5425	-0.156239	0.229199
TNFR2 non-canonical NF-kB pathway	CD27	0.00039847	0	0	1	1.28613e-05	-0.188061	0.0470694	-0.444637	1.79494e-05	na	na	-0.211523	0.101747
TNFR2 non-canonical NF-kB pathway	LTA	0.00039847	0	0	1	1.31645e-05	-0.312376	0.000799077	-0.348282	0.00101583	-0.090294	0.62905	-0.294554	0.0212042
TNFR2 non-canonical NF-kB pathway	TNFSF13B	0.00039847	0	0	1	1.62641e-05	-0.321096	0.000556619	-0.32203	0.00249733	-0.268606	0.143993	-0.234028	0.0694772
TNFR2 non-canonical NF-kB pathway	TNFSF14	5.27196e-05	0	0	1	5.37955e-07	-0.316236	0.000681811	-0.371975	0.000421063	-0.342927	0.0589461	-0.308813	0.0154559
TNFs bind their physiological receptors	TNFRSF4	0.0200904	0	0	1	0.0066968	-0.22462	0.0172657	-0.215843	0.0459392	-0.145815	0.433806	-0.230957	0.0733238
TNFs bind their physiological receptors	TNFSF18	0.0104448	0	0	0	0.00309476	-0.252429	0.00725033	-0.14363	0.18706	0.145815	0.433806	-0.30887	0.015436
TNFs bind their physiological receptors	TNFRSF1B	0.00887219	0	0	1	0.0023002	-0.200879	0.0336907	-0.316398	0.00299876	0.0450369	0.809887	-0.229315	0.0754482
TNFs bind their physiological receptors	TNFRSF17	0.00426561	0	0	1	0.000947914	-0.110603	0.245662	-0.43289	3.14334e-05	0.0977483	0.600884	-0.103405	0.427752
TNFs bind their physiological receptors	TNFRSF13B	0.00093239	0	0	1	0.000172665	-0.188409	0.0466549	-0.412127	8.0563e-05	0.0699061	0.70864	-0.219217	0.0896154
TNFs bind their physiological receptors	CD27	0.000109783	0	0	1	1.28613e-05	-0.188061	0.0470694	-0.444637	1.79494e-05	na	na	-0.211523	0.101747
TNFs bind their physiological receptors	LTA	0.000109783	0	0	1	1.31645e-05	-0.312376	0.000799077	-0.348282	0.00101583	-0.090294	0.62905	-0.294554	0.0212042
TNFs bind their physiological receptors	TNFSF13B	0.000109783	0	0	1	1.62641e-05	-0.321096	0.000556619	-0.32203	0.00249733	-0.268606	0.143993	-0.234028	0.0694772
TNFs bind their physiological receptors	TNFSF14	1.45248e-05	0	0	1	5.37955e-07	-0.316236	0.000681811	-0.371975	0.000421063	-0.342927	0.0589461	-0.308813	0.0154559
Toll Like Receptor 4 (TLR4) Cascade	LY96	0.0338825	0	0	1	0.00301601	-0.234699	0.0127438	-0.229372	0.0336369	-0.291831	0.111166	-0.172287	0.184272
Toll Like Receptor 4 (TLR4) Cascade	MAPK14	0.0338825	0	0	1	0.00325389	0.216166	0.0220701	0.327538	0.0020811	0.154095	0.407859	0.0844344	0.517653
Toll Like Receptor 4 (TLR4) Cascade	MAPK10	0.0338825	0	0	1	0.00338825	-0.166835	0.0787212	-0.301551	0.0047793	-0.296072	0.105832	-0.147449	0.256794
Toll Like Receptor 4 (TLR4) Cascade	SKP1	0.00573115	0	0	0	0.000429836	-0.315175	0.000712378	-0.270529	0.0117609	na	na	-0.0716991	0.58293
Toll Like Receptor 4 (TLR4) Cascade	MEF2C	0.00317457	0	0	0	0.000211638	-0.192515	0.0419928	-0.428434	3.86702e-05	-0.193275	0.297527	-0.0621674	0.634103
Toll Like Receptor 4 (TLR4) Cascade	CD36	0.00269846	0	0	1	0.00015741	-0.248323	0.00829034	-0.387344	0.0002292	-0.133091	0.47538	-0.154015	0.235978
Toll Like Receptor 4 (TLR4) Cascade	CD14	0.00100267	0	0	1	4.18995e-05	-0.323766	0.000497199	-0.215872	0.0459099	-0.350601	0.0531464	-0.269904	0.0354115
Toll Like Receptor 4 (TLR4) Cascade	PLCG2	0.00100267	0	0	1	4.66838e-05	-0.256919	0.00624695	-0.401708	0.000126297	-0.0838131	0.653962	-0.215839	0.0947939
Toll Like Receptor 4 (TLR4) Cascade	TLR1	0.00100267	0	0	0	5.01333e-05	-0.270131	0.00397076	-0.361091	0.00063634	-0.2577	0.161627	-0.195796	0.130469
Toll Like Receptor 4 (TLR4) Cascade	ITGB2	0.000994901	0	0	1	2.48725e-05	-0.300832	0.00126862	-0.296508	0.00556958	-0.345956	0.0566	-0.24446	0.0576023
Toll Like Receptor 4 (TLR4) Cascade	LY86	0.000863372	0	0	0	1.43895e-05	-0.315833	0.000693258	-0.319792	0.00268675	-0.312261	0.0872272	-0.230401	0.0740379
Toll Like Receptor 4 (TLR4) Cascade	BTK	0.000114732	0	0	1	9.56104e-07	-0.259905	0.00564973	-0.497579	1.09309e-06	-0.139352	0.454669	-0.173714	0.180608
Toll-Like Receptors Cascades	LY96	0.0323013	0	0	1	0.00301601	-0.234699	0.0127438	-0.229372	0.0336369	-0.291831	0.111166	-0.172287	0.184272
Toll-Like Receptors Cascades	MAPK14	0.0323013	0	0	1	0.00325389	0.216166	0.0220701	0.327538	0.0020811	0.154095	0.407859	0.0844344	0.517653
Toll-Like Receptors Cascades	MAPK10	0.0323013	0	0	1	0.00338825	-0.166835	0.0787212	-0.301551	0.0047793	-0.296072	0.105832	-0.147449	0.256794
Toll-Like Receptors Cascades	TLR8	0.0245204	0	0	1	0.00205766	-0.189203	0.0457211	-0.317081	0.00293352	-0.197112	0.287852	-0.191904	0.138442
Toll-Like Receptors Cascades	TLR10	0.0154659	0	0	0	0.00118968	-0.189821	0.0450055	-0.364372	0.000562726	-0.173483	0.350653	-0.135383	0.298201
Toll-Like Receptors Cascades	SKP1	0.00614666	0	0	0	0.000429836	-0.315175	0.000712378	-0.270529	0.0117609	na	na	-0.0716991	0.58293
Toll-Like Receptors Cascades	MEF2C	0.00349469	0	0	0	0.000211638	-0.192515	0.0419928	-0.428434	3.86702e-05	-0.193275	0.297527	-0.0621674	0.634103
Toll-Like Receptors Cascades	TLR7	0.00349469	0	0	1	0.000219945	-0.258917	0.0058415	-0.352179	0.00088291	-0.230032	0.213166	-0.13707	0.292164
Toll-Like Receptors Cascades	CD36	0.00321566	0	0	1	0.00015741	-0.248323	0.00829034	-0.387344	0.0002292	-0.133091	0.47538	-0.154015	0.235978
Toll-Like Receptors Cascades	CD14	0.00119484	0	0	1	4.18995e-05	-0.323766	0.000497199	-0.215872	0.0459099	-0.350601	0.0531464	-0.269904	0.0354115
Toll-Like Receptors Cascades	PLCG2	0.00119484	0	0	1	4.66838e-05	-0.256919	0.00624695	-0.401708	0.000126297	-0.0838131	0.653962	-0.215839	0.0947939
Toll-Like Receptors Cascades	TLR1	0.00119484	0	0	0	5.01333e-05	-0.270131	0.00397076	-0.361091	0.00063634	-0.2577	0.161627	-0.195796	0.130469
Toll-Like Receptors Cascades	ITGB2	0.00118559	0	0	1	2.48725e-05	-0.300832	0.00126862	-0.296508	0.00556958	-0.345956	0.0566	-0.24446	0.0576023
Toll-Like Receptors Cascades	LY86	0.00102885	0	0	0	1.43895e-05	-0.315833	0.000693258	-0.319792	0.00268675	-0.312261	0.0872272	-0.230401	0.0740379
Toll-Like Receptors Cascades	BTK	0.000136723	0	0	1	9.56104e-07	-0.259905	0.00564973	-0.497579	1.09309e-06	-0.139352	0.454669	-0.173714	0.180608
Trafficking and processing of endosomal TLR	CTSB	0.0190289	0	0	1	0.00645812	-0.20482	0.0302874	-0.166969	0.124402	-0.389922	0.0301259	-0.162197	0.21171
Trafficking and processing of endosomal TLR	CTSS	0.0190289	0	0	1	0.00691959	-0.214947	0.0228499	-0.295407	0.00575683	-0.115925	0.534589	-0.115624	0.37489
Trafficking and processing of endosomal TLR	TLR8	0.0113171	0	0	1	0.00205766	-0.189203	0.0457211	-0.317081	0.00293352	-0.197112	0.287852	-0.191904	0.138442
Trafficking and processing of endosomal TLR	TLR7	0.0024194	0	0	1	0.000219945	-0.258917	0.0058415	-0.352179	0.00088291	-0.230032	0.213166	-0.13707	0.292164
Transfer of LPS from LBP carrier to CD14	CD14	8.37989e-05	0	0	1	4.18995e-05	-0.323766	0.000497199	-0.215872	0.0459099	-0.350601	0.0531464	-0.269904	0.0354115
Translocation of ZAP-70 to Immunological synapse	HLA-DQB1	0.0294941	0	0	0	0.0258074	-0.149144	0.116538	-0.229733	0.0333514	-0.296274	0.105583	-0.110355	0.397184
Translocation of ZAP-70 to Immunological synapse	ZAP70	0.0269826	0	0	1	0.0219234	-0.202646	0.0321267	-0.177853	0.10136	-0.0743285	0.691082	-0.244645	0.0574072
Translocation of ZAP-70 to Immunological synapse	HLA-DRA	0.0138289	0	0	1	0.0103717	-0.21567	0.0223847	-0.244627	0.0232081	-0.166414	0.370925	-0.153777	0.236713
Translocation of ZAP-70 to Immunological synapse	HLA-DPA1	0.00753037	0	0	0	0.00517713	-0.219503	0.0200516	-0.270197	0.0118686	-0.119964	0.520347	-0.189071	0.144472
Translocation of ZAP-70 to Immunological synapse	PTPN22	0.0012378	0	0	0	0.000773626	-0.211374	0.0252719	-0.377067	0.000345366	-0.108048	0.562884	-0.131457	0.312561
Translocation of ZAP-70 to Immunological synapse	HLA-DQB2	0.000600989	0	0	0	0.000338056	-0.283557	0.00244834	-0.299987	0.00501308	-0.126225	0.498646	-0.219492	0.0892024
Translocation of ZAP-70 to Immunological synapse	HLA-DQA1	0.000297311	0	0	1	0.000148656	-0.248918	0.00813199	-0.313971	0.00324138	-0.319298	0.0799668	-0.216156	0.0942971
Translocation of ZAP-70 to Immunological synapse	HLA-DQA2	0.000218603	0	0	0	9.5639e-05	-0.321413	0.000549246	-0.173843	0.109427	na	na	-0.31277	0.0141202
Translocation of ZAP-70 to Immunological synapse	HLA-DPB1	2.75498e-05	0	0	0	1.03312e-05	-0.246881	0.00868559	-0.438617	2.3982e-05	-0.196506	0.289366	-0.193598	0.134927
Translocation of ZAP-70 to Immunological synapse	CD3E	1.65518e-05	0	0	1	5.17245e-06	-0.279809	0.00280885	-0.417617	6.31909e-05	-0.20822	0.26099	-0.227488	0.0778698
Translocation of ZAP-70 to Immunological synapse	CD3G	1.22823e-05	0	0	1	1.69657e-06	-0.285846	0.00224926	-0.43236	3.2224e-05	-0.11855	0.525311	-0.285261	0.0258546
Translocation of ZAP-70 to Immunological synapse	CD3D	1.22823e-05	0	0	1	2.92435e-06	-0.24858	0.00822166	-0.485586	2.14791e-06	-0.0931126	0.618336	-0.178083	0.169721
Translocation of ZAP-70 to Immunological synapse	CD247	1.22823e-05	0	0	1	3.07057e-06	-0.250569	0.00770618	-0.483139	2.45751e-06	-0.0605878	0.74611	-0.191718	0.138831
Translocation of ZAP-70 to Immunological synapse	CD4	9.51001e-06	0	0	1	5.94376e-07	-0.313716	0.000756445	-0.441091	2.13036e-05	-0.15773	0.396751	-0.256639	0.0458767
TRIF-mediated programmed cell death	LY96	0.0135721	0	0	1	0.00301601	-0.234699	0.0127438	-0.229372	0.0336369	-0.291831	0.111166	-0.172287	0.184272
TRIF-mediated programmed cell death	CD14	0.000377095	0	0	1	4.18995e-05	-0.323766	0.000497199	-0.215872	0.0459099	-0.350601	0.0531464	-0.269904	0.0354115

## Sheet: Sheet1
Adaptive Immune System	PJA2	0.0479202	0	0	0	0.00717216	-0.24431	0.00943183	-0.294203	0.00596795	-0.0880543	0.637616	-0.0380736	0.770808
Adaptive Immune System	CTSS	0.0466454	0	0	1	0.00691959	-0.214947	0.0228499	-0.295407	0.00575683	-0.115925	0.534589	-0.115624	0.37489
Adaptive Immune System	CTSB	0.0439269	0	0	1	0.00645812	-0.20482	0.0302874	-0.166969	0.124402	-0.389922	0.0301259	-0.162197	0.21171
Adaptive Immune System	ASB16	0.0426274	0	0	0	0.00621062	-0.17176	0.070168	-0.356047	0.000766811	-0.141372	0.448092	0.00886972	0.945911
Adaptive Immune System	UBE2V2	0.0415343	0	0	0	0.00599634	0.198119	0.0362616	0.237564	0.0276318	-0.000706929	0.996989	0.29331	0.0217825
Adaptive Immune System	KLRD1	0.0410538	0	0	0	0.0058726	-0.192678	0.0418156	-0.25681	0.0169915	-0.263355	0.1523	-0.168013	0.195563
Adaptive Immune System	HLA-DPA1	0.0365302	0	0	0	0.00517713	-0.219503	0.0200516	-0.270197	0.0118686	-0.119964	0.520347	-0.189071	0.144472
Adaptive Immune System	SMURF2	0.0355578	0	0	0	0.00499222	0.208914	0.0270643	-0.100489	0.357265	-0.039487	0.832964	0.386111	0.00211656
Adaptive Immune System	KLRF1	0.0354589	0	0	0	0.00488965	-0.237202	0.0117956	-0.257025	0.0168964	-0.0999699	0.592595	-0.190968	0.140413
Adaptive Immune System	SIGLEC12	0.0354589	0	0	0	0.00493137	-0.188874	0.0461066	-0.159773	0.141711	na	na	-0.31277	0.0141202
Adaptive Immune System	TRAT1	0.032723	0	0	0	0.00438813	-0.198736	0.0356739	-0.318882	0.00276743	-0.146622	0.431235	-0.124897	0.337528
Adaptive Immune System	RNF130	0.032723	0	0	0	0.00443812	-0.255734	0.00649908	-0.204978	0.0583276	-0.162441	0.382617	-0.212238	0.100568
Adaptive Immune System	FBXO2	0.032723	0	0	0	0.0044642	0.0257137	0.787838	0.370838	0.000439935	-0.216702	0.241621	-0.175726	0.175532
Adaptive Immune System	PIK3R1	0.0310272	0	0	1	0.00410956	-0.192326	0.0421977	-0.349325	0.00097858	-0.0107038	0.954427	-0.125712	0.334362
Adaptive Immune System	KLC3	0.0298151	0	0	0	0.00390954	0.194243	0.0401498	0.294952	0.00583583	-0.139972	0.452645	0.203156	0.116345
Adaptive Immune System	KLRK1	0.0286218	0	0	0	0.00368627	-0.260132	0.00560652	-0.168467	0.121012	-0.314047	0.0853384	-0.167386	0.197259
Adaptive Immune System	UBE2L6	0.0286218	0	0	0	0.00371515	-0.23746	0.0117016	-0.152027	0.162309	-0.441685	0.0128622	-0.0937542	0.472338
Adaptive Immune System	RASGRP1	0.0281105	0	0	0	0.00357431	-0.150209	0.113921	-0.362883	0.000595106	-0.0914876	0.624504	-0.146761	0.259046
Adaptive Immune System	FCGR2B	0.0268256	0	0	1	0.00337541	-0.24573	0.00901291	-0.217616	0.0441411	-0.219328	0.235826	-0.207578	0.108442
Adaptive Immune System	HLA-G	0.0262928	0	0	0	0.00327354	-0.22296	0.0181303	-0.158702	0.144436	-0.411997	0.0212793	-0.175779	0.1754
Adaptive Immune System	NCF2	0.0258358	0	0	1	0.00318242	-0.197747	0.0366207	-0.181427	0.0945691	-0.483289	0.00588439	-0.0958988	0.46222
Adaptive Immune System	HLA-E	0.0254427	0	0	0	0.00310031	-0.216748	0.0217061	-0.0683671	0.531666	-0.51439	0.0030717	-0.147449	0.256794
Adaptive Immune System	TRIM69	0.0250529	0	0	0	0.00296488	-0.229288	0.0150229	-0.174004	0.109093	-0.385944	0.0320001	-0.180572	0.163738
Adaptive Immune System	CLEC2D	0.0250529	0	0	0	0.00299777	-0.25537	0.00657824	-0.21937	0.0424199	-0.308019	0.0918404	-0.124282	0.339933
Adaptive Immune System	LY96	0.0250529	0	0	1	0.00301601	-0.234699	0.0127438	-0.229372	0.0336369	-0.291831	0.111166	-0.172287	0.184272
Adaptive Immune System	CD207	0.0250529	0	0	0	0.00301962	-0.146626	0.122908	-0.230766	0.0325439	-0.502273	0.00398545	-0.0777034	0.551691
Adaptive Immune System	NCR3	0.0241193	0	0	0	0.00277932	-0.244575	0.00935246	-0.230975	0.032383	-0.19693	0.288306	-0.218696	0.0903981
Adaptive Immune System	LAT	0.0197339	0	0	0	0.00223388	-0.180911	0.0562762	-0.258157	0.016402	-0.237302	0.198652	-0.274299	0.032416
Adaptive Immune System	AP1M1	0.0197339	0	0	0	0.00224784	-0.239	0.0111533	-0.323708	0.00236323	-0.0252449	0.892768	-0.148111	0.254641
Adaptive Immune System	ITGA4	0.0190582	0	0	1	0.00212039	-0.213565	0.0237621	-0.325576	0.00222162	-0.198324	0.284839	-0.116921	0.369518
Adaptive Immune System	VCAM1	0.0183977	0	0	1	0.00202253	-0.178836	0.0592097	-0.369596	0.00046142	-0.0441326	0.813637	-0.15428	0.235164
Adaptive Immune System	HLA-DMB	0.0162408	0	0	0	0.0017639	-0.226242	0.0164557	-0.296536	0.00556505	-0.216096	0.242972	-0.167492	0.196972
Adaptive Immune System	SIGLEC5	0.0152737	0	0	0	0.00163863	-0.281644	0.00262672	-0.076132	0.485991	-0.268202	0.14462	-0.293707	0.0215965
Adaptive Immune System	CD22	0.0147891	0	0	1	0.00154908	-0.228612	0.0153311	-0.281432	0.00866515	na	na	-0.178374	0.169013
Adaptive Immune System	FCGR1B	0.0147891	0	0	0	0.00156297	-0.245572	0.00905877	-0.212714	0.0492602	na	na	-0.251185	0.0508595
Adaptive Immune System	SIGLEC9	0.0147891	0	0	0	0.00156706	-0.268826	0.00415664	-0.0824653	0.45034	-0.387964	0.031037	-0.237947	0.0648057
Adaptive Immune System	ITPR1	0.0105932	0	0	1	0.00106816	-0.196549	0.0377967	-0.327443	0.0020877	-0.295063	0.107084	-0.142498	0.273288
Adaptive Immune System	CD200R1	0.0105932	0	0	0	0.00107419	-0.281356	0.00265459	-0.210458	0.051776	-0.202161	0.275431	-0.240915	0.0614376
Adaptive Immune System	CD300C	0.0105932	0	0	0	0.00108037	-0.280604	0.00272853	-0.130809	0.229951	-0.310209	0.0894353	-0.261537	0.0417502
Adaptive Immune System	SIGLEC7	0.00892552	0	0	0	0.000874819	-0.285276	0.00229733	-0.220953	0.0409145	-0.20923	0.258633	-0.230613	0.0737652
Adaptive Immune System	CD226	0.00887608	0	0	0	0.000858217	-0.257701	0.00608537	-0.280674	0.00885463	-0.0723014	0.699111	-0.255971	0.0464644
Adaptive Immune System	PTPN22	0.00811233	0	0	0	0.000773626	-0.211374	0.0252719	-0.377067	0.000345366	-0.108048	0.562884	-0.131457	0.312561
Adaptive Immune System	TREM2	0.00782376	0	0	0	0.000735744	-0.298052	0.00141404	-0.22996	0.0331722	-0.172473	0.353508	-0.221028	0.0869311
Adaptive Immune System	SELL	0.00725153	0	0	1	0.000672327	-0.191599	0.0429973	-0.373758	0.000392984	-0.163789	0.378626	-0.165956	0.201168
Adaptive Immune System	SH2D1A	0.00721991	0	0	0	0.000659833	-0.195347	0.0390087	-0.387164	0.00023088	-0.114219	0.540656	-0.147032	0.258158
Adaptive Immune System	SIGLEC1	0.00715321	0	0	0	0.000644263	-0.285764	0.00225607	-0.197308	0.0686176	-0.232657	0.207844	-0.266462	0.0379149
Adaptive Immune System	CD300LB	0.0063193	0	0	0	0.000560785	-0.264428	0.00484173	-0.250885	0.0198082	-0.304151	0.0962073	-0.206058	0.111111
Adaptive Immune System	CD300LF	0.00603617	0	0	0	0.000527665	-0.217903	0.0209987	-0.320342	0.00263904	-0.221291	0.231554	-0.230401	0.0740379
Adaptive Immune System	LILRB1	0.00602763	0	0	0	0.000518935	-0.257617	0.00610257	-0.304139	0.00441372	-0.232455	0.20825	-0.179674	0.165878
Adaptive Immune System	SKP1	0.00513319	0	0	0	0.000429836	-0.315175	0.000712378	-0.270529	0.0117609	na	na	-0.0716991	0.58293
Adaptive Immune System	FCGR1A	0.00513319	0	0	1	0.000435132	-0.261394	0.00537139	-0.223911	0.038221	-0.363527	0.0444075	-0.224523	0.0819314
Adaptive Immune System	NCF4	0.0046982	0	0	0	0.000380041	-0.176205	0.0631076	-0.404459	0.00011232	-0.271231	0.139965	-0.0617703	0.636275
Adaptive Immune System	SLAMF7	0.0046982	0	0	1	0.000381781	-0.228698	0.0152918	-0.359973	0.000663391	-0.0910836	0.626041	-0.212608	0.0999617
Adaptive Immune System	PIK3CD	0.0046982	0	0	1	0.000385813	-0.265809	0.0046164	-0.273184	0.0109297	-0.356898	0.0487333	-0.145993	0.261574
Adaptive Immune System	GRAP2	0.00468994	0	0	0	0.000366499	-0.263401	0.00501562	-0.342613	0.00124184	0.0304959	0.870634	-0.205963	0.11128
Adaptive Immune System	LCP2	0.00465322	0	0	0	0.000357466	-0.258643	0.00589564	-0.296365	0.00559369	-0.308998	0.0907598	-0.168048	0.195468
Adaptive Immune System	HLA-DQB2	0.00447776	0	0	0	0.000338056	-0.283557	0.00244834	-0.299987	0.00501308	-0.126225	0.498646	-0.219492	0.0892024
Adaptive Immune System	SIGLEC10	0.00432224	0	0	0	0.00032059	-0.212624	0.0244011	-0.36348	0.000581914	-0.255882	0.16471	-0.159814	0.218589
Adaptive Immune System	HLA-DOA	0.00426465	0	0	0	0.00031067	-0.207044	0.0284979	-0.407282	9.94772e-05	-0.13087	0.482844	-0.119437	0.359237
Adaptive Immune System	LILRB2	0.00398384	0	0	0	0.000284937	-0.257946	0.00603556	-0.272312	0.011197	-0.212259	0.251644	-0.285022	0.0259843
Adaptive Immune System	PSMB10	0.00387782	0	0	1	0.000272218	-0.261296	0.0053894	-0.274891	0.0104228	-0.308594	0.0912045	-0.224814	0.0815252
Adaptive Immune System	LAIR1	0.00380933	0	0	0	0.000262364	-0.323809	0.000496296	-0.0939372	0.389627	-0.316066	0.0832407	-0.287246	0.0247947
Adaptive Immune System	PTPRC	0.00343268	0	0	1	0.000231876	-0.216414	0.0219142	-0.383106	0.000271863	-0.244169	0.185587	-0.132146	0.310011
Adaptive Immune System	BLK	0.00341498	0	0	1	0.000226157	-0.168931	0.0749844	-0.42376	4.79094e-05	0.0335286	0.857892	-0.207917	0.107854
Adaptive Immune System	CD79A	0.00267942	0	0	1	0.000173896	-0.147779	0.119958	-0.459219	8.6942e-06	0.0280723	0.880838	-0.145834	0.262099
Adaptive Immune System	UBA7	0.00261914	0	0	0	0.000166515	-0.211379	0.0252689	-0.394132	0.000173525	na	na	-0.117371	0.367665
Adaptive Immune System	CD36	0.00252861	0	0	1	0.00015741	-0.248323	0.00829034	-0.387344	0.0002292	-0.133091	0.47538	-0.154015	0.235978
Adaptive Immune System	HLA-DQA1	0.00246859	0	0	1	0.000148656	-0.248918	0.00813199	-0.313971	0.00324138	-0.319298	0.0799668	-0.216156	0.0942971
Adaptive Immune System	CD1C	0.00246859	0	0	0	0.000150404	-0.18329	0.0530613	-0.398152	0.000146744	-0.291154	0.112037	-0.155604	0.231122
Adaptive Immune System	CYBB	0.00211211	0	0	0	0.000118131	-0.247065	0.00863425	-0.349667	0.000966662	-0.338888	0.0621922	-0.137865	0.289349
Adaptive Immune System	CD40LG	0.00211211	0	0	1	0.000121364	-0.241576	0.0102866	-0.322267	0.00247799	0.247955	0.178646	-0.27181	0.0340851
Adaptive Immune System	VAV1	0.00211211	0	0	1	0.00012309	-0.227008	0.0160848	-0.366372	0.000521745	-0.264567	0.150353	-0.198496	0.125144
Adaptive Immune System	ITGB7	0.00208429	0	0	1	0.000113187	-0.246616	0.00876009	-0.399565	0.000138278	-0.04999	0.789422	-0.186952	0.149107
Adaptive Immune System	HLA-DQA2	0.00180519	0	0	0	9.5639e-05	-0.321413	0.000549246	-0.173843	0.109427	na	na	-0.31277	0.0141202
Adaptive Immune System	FBXL5	0.00137174	0	0	0	7.08581e-05	-0.299702	0.00132599	-0.360873	0.000641533	-0.0319096	0.86469	-0.206747	0.109896
Adaptive Immune System	CD40	0.00129183	0	0	1	6.3427e-05	-0.280147	0.00277448	-0.319916	0.00267599	-0.355448	0.0497225	-0.169504	0.191568
Adaptive Immune System	C3	0.00129183	0	0	1	6.50194e-05	-0.302104	0.00120668	-0.268832	0.0123207	na	na	-0.268226	0.036614
Adaptive Immune System	TLR1	0.00106958	0	0	0	5.01333e-05	-0.270131	0.00397076	-0.361091	0.00063634	-0.2577	0.161627	-0.195796	0.130469
Adaptive Immune System	CD86	0.00106958	0	0	1	5.09998e-05	-0.261385	0.00537296	-0.326505	0.00215406	-0.392407	0.029001	-0.181286	0.162048
Adaptive Immune System	PLCG2	0.00103666	0	0	1	4.66838e-05	-0.256919	0.00624695	-0.401708	0.000126297	-0.0838131	0.653962	-0.215839	0.0947939
Adaptive Immune System	CD14	0.00100021	0	0	1	4.18995e-05	-0.323766	0.000497199	-0.215872	0.0459099	-0.350601	0.0531464	-0.269904	0.0354115
Adaptive Immune System	CD33	0.00100021	0	0	1	4.36263e-05	-0.237986	0.0115117	-0.394151	0.000173389	-0.358817	0.047448	-0.0929599	0.476115
Adaptive Immune System	TYROBP	0.00100021	0	0	0	4.37179e-05	-0.315179	0.000712252	-0.214611	0.0472247	-0.360295	0.0464762	-0.279886	0.0289166
Adaptive Immune System	SIGLEC11	0.000704332	0	0	0	2.79867e-05	-0.276997	0.00310993	-0.234066	0.0300751	-0.398102	0.0265519	-0.324701	0.0106763
Adaptive Immune System	ITGB2	0.000647543	0	0	1	2.48725e-05	-0.300832	0.00126862	-0.296508	0.00556958	-0.345956	0.0566	-0.24446	0.0576023
Adaptive Immune System	PRKCQ	0.000421259	0	0	1	1.47931e-05	-0.266763	0.00446629	-0.362428	0.00060534	-0.336262	0.0643762	-0.232466	0.0714129
Adaptive Immune System	RASGRP2	0.000421259	0	0	0	1.55778e-05	-0.215662	0.0223899	-0.461362	7.79366e-06	0.0563523	0.763337	-0.213075	0.0992027
Adaptive Immune System	CD19	0.000421259	0	0	1	1.56229e-05	-0.182697	0.0538484	-0.473696	4.09321e-06	0.0537212	0.774095	-0.227606	0.0777116
Adaptive Immune System	LILRA1	0.000312002	0	0	0	1.02643e-05	-0.310257	0.000871056	-0.213445	0.0484681	-0.455666	0.00999355	-0.299272	0.0191286
Adaptive Immune System	HLA-DPB1	0.000312002	0	0	0	1.03312e-05	-0.246881	0.00868559	-0.438617	2.3982e-05	-0.196506	0.289366	-0.193598	0.134927
Adaptive Immune System	ITK	0.000306184	0	0	1	9.32745e-06	-0.212966	0.0241671	-0.472388	4.38781e-06	-0.132889	0.476056	-0.189838	0.142819
Adaptive Immune System	CD300A	0.00030177	0	0	0	7.60859e-06	-0.306331	0.00102027	-0.263438	0.0142568	-0.413411	0.0207951	-0.300167	0.0187552
Adaptive Immune System	ITGAL	0.00030177	0	0	1	8.19408e-06	-0.260996	0.00544455	-0.428463	3.86195e-05	-0.200465	0.279565	-0.209405	0.105301
Adaptive Immune System	CD8A	0.00030177	0	0	0	8.53425e-06	-0.248049	0.00836416	-0.391421	0.000194066	-0.352015	0.0521291	-0.228336	0.0767392
Adaptive Immune System	FYB	0.00030177	0	0	0	8.7933e-06	-0.289983	0.00192617	-0.396616	0.00015649	-0.344341	0.0578419	-0.113029	0.385773
Adaptive Immune System	CD79B	0.000284982	0	0	1	6.79427e-06	-0.189734	0.0451059	-0.498072	1.06257e-06	-0.0329194	0.860449	-0.200959	0.120434
Adaptive Immune System	CD3E	0.000229718	0	0	1	5.17245e-06	-0.279809	0.00280885	-0.417617	6.31909e-05	-0.20822	0.26099	-0.227488	0.0778698
Adaptive Immune System	ASB2	0.00016979	0	0	0	3.5982e-06	-0.307931	0.000956846	-0.351127	0.000917152	-0.108452	0.561416	-0.356589	0.0047903
Adaptive Immune System	NCF1	0.000154552	0	0	1	2.72756e-06	-0.273896	0.00347547	-0.401404	0.000127933	na	na	-0.272155	0.0338501
Adaptive Immune System	CD3D	0.000154552	0	0	1	2.92435e-06	-0.24858	0.00822166	-0.485586	2.14791e-06	-0.0931126	0.618336	-0.178083	0.169721
Adaptive Immune System	CD247	0.000154552	0	0	1	3.07057e-06	-0.250569	0.00770618	-0.483139	2.45751e-06	-0.0605878	0.74611	-0.191718	0.138831
Adaptive Immune System	WAS	0.000128756	0	0	0	2.04646e-06	-0.288638	0.00202627	-0.435213	2.81827e-05	-0.180469	0.331287	-0.238056	0.0646794
Adaptive Immune System	CD3G	0.000116446	0	0	1	1.69657e-06	-0.285846	0.00224926	-0.43236	3.2224e-05	-0.11855	0.525311	-0.285261	0.0258546
Adaptive Immune System	SLAMF6	0.000116408	0	0	1	1.54182e-06	-0.200841	0.0337255	-0.518826	3.09552e-07	-0.0585682	0.754309	-0.205619	0.111892
Adaptive Immune System	KLRB1	8.35269e-05	0	0	0	4.67402e-07	-0.238793	0.0112256	-0.519698	2.93383e-07	-0.0898719	0.63066	-0.208322	0.107154
Adaptive Immune System	CD4	8.35269e-05	0	0	1	5.94376e-07	-0.313716	0.000756445	-0.441091	2.13036e-05	-0.15773	0.396751	-0.256639	0.0458767
Adaptive Immune System	CLEC2B	8.35269e-05	0	0	0	6.60576e-07	-0.303161	0.0011574	-0.411653	8.22544e-05	-0.471575	0.00740466	-0.0942838	0.469829
Adaptive Immune System	EVL	8.35269e-05	0	0	0	7.41543e-07	-0.278097	0.00298883	-0.466737	5.90453e-06	-0.3092	0.090538	-0.153751	0.236794
Adaptive Immune System	HCST	8.35269e-05	0	0	0	7.85565e-07	-0.301586	0.00123156	-0.37628	0.000356183	-0.372009	0.0393256	-0.289894	0.0234386
Adaptive Immune System	BTK	8.35269e-05	0	0	1	9.56104e-07	-0.259905	0.00564973	-0.497579	1.09309e-06	-0.139352	0.454669	-0.173714	0.180608
Adaptive Immune System	CD96	8.35269e-05	0	0	0	9.95685e-07	-0.253684	0.00695644	-0.489662	1.71215e-06	-0.0713998	0.702692	-0.239085	0.0634968
Adaptive Immune System	PRKCB	5.51342e-06	0	0	1	1.46051e-08	-0.298168	0.00140771	-0.515868	3.70902e-07	na	na	-0.218274	0.0910368
Adaptive Immune System	CD1D	4.52189e-06	0	0	0	5.98926e-09	-0.298159	0.00140818	-0.488401	1.83712e-06	-0.351849	0.0522481	-0.320263	0.0118613
Alternative complement activation	CFD	0.0424988	0	0	1	0.033999	-0.131983	0.165387	-0.268595	0.0124007	-0.128042	0.492432	-0.152612	0.240326
Alternative complement activation	CFP	0.00467037	0	0	0	0.00280222	-0.22222	0.0185277	-0.155677	0.152342	-0.0480663	0.797354	-0.367789	0.00354491
Alternative complement activation	C3	0.000162549	0	0	1	6.50194e-05	-0.302104	0.00120668	-0.268832	0.0123207	na	na	-0.268226	0.036614
Alternative complement activation	GZMM	5.74904e-06	0	0	0	1.14981e-06	-0.327471	0.000424368	-0.348937	0.000992317	-0.146738	0.430868	-0.368689	0.00345856
Antigen activates B Cell Receptor (BCR) leading to generation of second messengers	PTPN6	0.0458317	0	0	1	0.0165504	-0.187205	0.0481008	-0.139066	0.201605	-0.335656	0.0648886	-0.192009	0.138221
Antigen activates B Cell Receptor (BCR) leading to generation of second messengers	SRMS	0.0349637	0	0	1	0.0116546	0.185167	0.0506333	0.30558	0.00422115	0.156433	0.400694	0.063862	0.624871
Antigen activates B Cell Receptor (BCR) leading to generation of second messengers	PIK3R1	0.0134495	0	0	1	0.00410956	-0.192326	0.0421977	-0.349325	0.00097858	-0.0107038	0.954427	-0.125712	0.334362
Antigen activates B Cell Receptor (BCR) leading to generation of second messengers	CD22	0.00557669	0	0	1	0.00154908	-0.228612	0.0153311	-0.281432	0.00866515	na	na	-0.178374	0.169013
Antigen activates B Cell Receptor (BCR) leading to generation of second messengers	ITPR1	0.00427265	0	0	1	0.00106816	-0.196549	0.0377967	-0.327443	0.0020877	-0.295063	0.107084	-0.142498	0.273288
Antigen activates B Cell Receptor (BCR) leading to generation of second messengers	PIK3CD	0.00173616	0	0	1	0.000385813	-0.265809	0.0046164	-0.273184	0.0109297	-0.356898	0.0487333	-0.145993	0.261574
Antigen activates B Cell Receptor (BCR) leading to generation of second messengers	BLK	0.00116309	0	0	1	0.000226157	-0.168931	0.0749844	-0.42376	4.79094e-05	0.0335286	0.857892	-0.207917	0.107854
Antigen activates B Cell Receptor (BCR) leading to generation of second messengers	CD79A	0.00104338	0	0	1	0.000173896	-0.147779	0.119958	-0.459219	8.6942e-06	0.0280723	0.880838	-0.145834	0.262099
Antigen activates B Cell Receptor (BCR) leading to generation of second messengers	VAV1	0.000886247	0	0	1	0.00012309	-0.227008	0.0160848	-0.366372	0.000521745	-0.264567	0.150353	-0.198496	0.125144
Antigen activates B Cell Receptor (BCR) leading to generation of second messengers	PLCG2	0.000420154	0	0	1	4.66838e-05	-0.256919	0.00624695	-0.401708	0.000126297	-0.0838131	0.653962	-0.215839	0.0947939
Antigen activates B Cell Receptor (BCR) leading to generation of second messengers	CD19	0.000187474	0	0	1	1.56229e-05	-0.182697	0.0538484	-0.473696	4.09321e-06	0.0537212	0.774095	-0.227606	0.0777116
Antigen activates B Cell Receptor (BCR) leading to generation of second messengers	CD79B	0.000122297	0	0	1	6.79427e-06	-0.189734	0.0451059	-0.498072	1.06257e-06	-0.0329194	0.860449	-0.200959	0.120434
Antigen activates B Cell Receptor (BCR) leading to generation of second messengers	BTK	3.44197e-05	0	0	1	9.56104e-07	-0.259905	0.00564973	-0.497579	1.09309e-06	-0.139352	0.454669	-0.173714	0.180608
Cam-PDE 1 activation	PDE1A	0.00481072	0	0	1	0.000801787	-0.220547	0.0194538	-0.362457	0.000604696	-0.0723014	0.699111	-0.168101	0.195325
CD22 mediated BCR regulation	PTPN6	0.0206879	0	0	1	0.0165504	-0.187205	0.0481008	-0.139066	0.201605	-0.335656	0.0648886	-0.192009	0.138221
CD22 mediated BCR regulation	CD22	0.0025818	0	0	1	0.00154908	-0.228612	0.0153311	-0.281432	0.00866515	na	na	-0.178374	0.169013
CD22 mediated BCR regulation	CD79A	0.000434741	0	0	1	0.000173896	-0.147779	0.119958	-0.459219	8.6942e-06	0.0280723	0.880838	-0.145834	0.262099
CD22 mediated BCR regulation	CD79B	3.39714e-05	0	0	1	6.79427e-06	-0.189734	0.0451059	-0.498072	1.06257e-06	-0.0329194	0.860449	-0.200959	0.120434
CD28 dependent Vav1 pathway	VAV1	0.000738539	0	0	1	0.00012309	-0.227008	0.0160848	-0.366372	0.000521745	-0.264567	0.150353	-0.198496	0.125144
CD28 dependent Vav1 pathway	CD86	0.000611998	0	0	1	5.09998e-05	-0.261385	0.00537296	-0.326505	0.00215406	-0.392407	0.029001	-0.181286	0.162048
Classical antibody-mediated complement activation	CRP	0.0135883	0	0	1	0.0135883	-0.269234	0.00409764	0.0176438	0.871904	-0.249951	0.175061	-0.209157	0.105722
Classical antibody-mediated complement activation	C1S	0.000473898	0	0	1	0.000394915	-0.243737	0.00960571	-0.313241	0.00331772	-0.311219	0.0883429	-0.15428	0.235164
Classical antibody-mediated complement activation	C1R	0.00041359	0	0	1	0.000275727	-0.267491	0.0043548	-0.327842	0.0020601	na	na	-0.128571	0.323395
Classical antibody-mediated complement activation	C1QB	3.11936e-05	0	0	1	1.55968e-05	-0.331001	0.00036425	-0.2318	0.0317529	-0.36797	0.0416839	-0.282401	0.0274478
Classical antibody-mediated complement activation	C1QC	2.38642e-05	0	0	0	7.95472e-06	-0.348949	0.000162764	-0.212032	0.0500104	-0.350399	0.053293	-0.313829	0.01378
Classical antibody-mediated complement activation	C1QA	5.60063e-06	0	0	1	9.33439e-07	-0.318687	0.000615758	-0.362656	0.000600203	-0.406746	0.0231598	-0.244433	0.0576302
Complement cascade	CRP	0.0407649	0	0	1	0.0135883	-0.269234	0.00409764	0.0176438	0.871904	-0.249951	0.175061	-0.209157	0.105722
Complement cascade	CD59	0.0235496	0	0	1	0.0070635	0.0198522	0.835417	-0.285339	0.00774463	-0.0854288	0.647716	0.345019	0.00646726
Complement cascade	FCN1	0.0235496	0	0	0	0.00724604	-0.142324	0.134407	-0.281565	0.00863236	-0.201879	0.276117	-0.220604	0.0875531
Complement cascade	CFP	0.0109287	0	0	0	0.00280222	-0.22222	0.0185277	-0.155677	0.152342	-0.0480663	0.797354	-0.367789	0.00354491
Complement cascade	CFH	0.0080476	0	0	0	0.00185714	-0.225181	0.0169819	-0.32422	0.00232363	-0.232253	0.208657	-0.0743997	0.56878
Complement cascade	C1S	0.00192521	0	0	1	0.000394915	-0.243737	0.00960571	-0.313241	0.00331772	-0.311219	0.0883429	-0.15428	0.235164
Complement cascade	C1R	0.00153619	0	0	1	0.000275727	-0.267491	0.0043548	-0.327842	0.0020601	na	na	-0.128571	0.323395
Complement cascade	C3	0.000422626	0	0	1	6.50194e-05	-0.302104	0.00120668	-0.268832	0.0123207	na	na	-0.268226	0.036614
Complement cascade	C1QB	0.000121655	0	0	1	1.55968e-05	-0.331001	0.00036425	-0.2318	0.0317529	-0.36797	0.0416839	-0.282401	0.0274478
Complement cascade	C3AR1	0.000104099	0	0	1	1.06769e-05	-0.30014	0.00130347	-0.345761	0.00111129	-0.292841	0.109878	-0.248855	0.0531186
Complement cascade	C1QC	0.000103411	0	0	0	7.95472e-06	-0.348949	0.000162764	-0.212032	0.0500104	-0.350399	0.053293	-0.313829	0.01378
Complement cascade	C1QA	2.24212e-05	0	0	1	9.33439e-07	-0.318687	0.000615758	-0.362656	0.000600203	-0.406746	0.0231598	-0.244433	0.0576302
Complement cascade	GZMM	2.24212e-05	0	0	0	1.14981e-06	-0.327471	0.000424368	-0.348937	0.000992317	-0.146738	0.430868	-0.368689	0.00345856
Costimulation by the CD28 family	TRIB3	0.0480125	0	0	0	0.0129558	0.13882	0.144365	0.369823	0.000457414	-0.0125215	0.946698	-0.00158861	0.990305
Costimulation by the CD28 family	HLA-DRA	0.0408386	0	0	1	0.0103717	-0.21567	0.0223847	-0.244627	0.0232081	-0.166414	0.370925	-0.153777	0.236713
Costimulation by the CD28 family	PDCD1LG2	0.0363974	0	0	1	0.00866605	-0.222162	0.0185592	-0.261816	0.0148879	0.0464506	0.804032	-0.181826	0.160782
Costimulation by the CD28 family	HLA-DPA1	0.0232971	0	0	0	0.00517713	-0.219503	0.0200516	-0.270197	0.0118686	-0.119964	0.520347	-0.189071	0.144472
Costimulation by the CD28 family	PIK3R1	0.0199155	0	0	1	0.00410956	-0.192326	0.0421977	-0.349325	0.00097858	-0.0107038	0.954427	-0.125712	0.334362
Costimulation by the CD28 family	HLA-DQB2	0.00192412	0	0	0	0.000338056	-0.283557	0.00244834	-0.299987	0.00501308	-0.126225	0.498646	-0.219492	0.0892024
Costimulation by the CD28 family	GRAP2	0.00192412	0	0	0	0.000366499	-0.263401	0.00501562	-0.342613	0.00124184	0.0304959	0.870634	-0.205963	0.11128
Costimulation by the CD28 family	HLA-DQA1	0.00093653	0	0	1	0.000148656	-0.248918	0.00813199	-0.313971	0.00324138	-0.319298	0.0799668	-0.216156	0.0942971
Costimulation by the CD28 family	VAV1	0.000861629	0	0	1	0.00012309	-0.227008	0.0160848	-0.366372	0.000521745	-0.264567	0.150353	-0.198496	0.125144
Costimulation by the CD28 family	HLA-DQA2	0.000753157	0	0	0	9.5639e-05	-0.321413	0.000549246	-0.173843	0.109427	na	na	-0.31277	0.0141202
Costimulation by the CD28 family	CD86	0.000458999	0	0	1	5.09998e-05	-0.261385	0.00537296	-0.326505	0.00215406	-0.392407	0.029001	-0.181286	0.162048
Costimulation by the CD28 family	HLA-DPB1	0.000108477	0	0	0	1.03312e-05	-0.246881	0.00868559	-0.438617	2.3982e-05	-0.196506	0.289366	-0.193598	0.134927
Costimulation by the CD28 family	CD3E	6.51729e-05	0	0	1	5.17245e-06	-0.279809	0.00280885	-0.417617	6.31909e-05	-0.20822	0.26099	-0.227488	0.0778698
Costimulation by the CD28 family	CD3G	4.83614e-05	0	0	1	1.69657e-06	-0.285846	0.00224926	-0.43236	3.2224e-05	-0.11855	0.525311	-0.285261	0.0258546
Costimulation by the CD28 family	CD3D	4.83614e-05	0	0	1	2.92435e-06	-0.24858	0.00822166	-0.485586	2.14791e-06	-0.0931126	0.618336	-0.178083	0.169721
Costimulation by the CD28 family	CD247	4.83614e-05	0	0	1	3.07057e-06	-0.250569	0.00770618	-0.483139	2.45751e-06	-0.0605878	0.74611	-0.191718	0.138831
Costimulation by the CD28 family	CD4	3.74457e-05	0	0	1	5.94376e-07	-0.313716	0.000756445	-0.441091	2.13036e-05	-0.15773	0.396751	-0.256639	0.0458767
Creation of C4 and C2 activators	CRP	0.0232942	0	0	1	0.0135883	-0.269234	0.00409764	0.0176438	0.871904	-0.249951	0.175061	-0.209157	0.105722
Creation of C4 and C2 activators	FCN1	0.0144921	0	0	0	0.00724604	-0.142324	0.134407	-0.281565	0.00863236	-0.201879	0.276117	-0.220604	0.0875531
Creation of C4 and C2 activators	C1S	0.000947795	0	0	1	0.000394915	-0.243737	0.00960571	-0.313241	0.00331772	-0.311219	0.0883429	-0.15428	0.235164
Creation of C4 and C2 activators	C1R	0.000827181	0	0	1	0.000275727	-0.267491	0.0043548	-0.327842	0.0020601	na	na	-0.128571	0.323395
Creation of C4 and C2 activators	C1QB	6.23873e-05	0	0	1	1.55968e-05	-0.331001	0.00036425	-0.2318	0.0317529	-0.36797	0.0416839	-0.282401	0.0274478
Creation of C4 and C2 activators	C1QC	4.77283e-05	0	0	0	7.95472e-06	-0.348949	0.000162764	-0.212032	0.0500104	-0.350399	0.053293	-0.313829	0.01378
Creation of C4 and C2 activators	C1QA	1.12013e-05	0	0	1	9.33439e-07	-0.318687	0.000615758	-0.362656	0.000600203	-0.406746	0.0231598	-0.244433	0.0576302
Cross-presentation of particulate exogenous antigens (phagosomes)	NCF2	0.00509187	0	0	1	0.00318242	-0.197747	0.0366207	-0.181427	0.0945691	-0.483289	0.00588439	-0.0958988	0.46222
Cross-presentation of particulate exogenous antigens (phagosomes)	NCF4	0.000760082	0	0	0	0.000380041	-0.176205	0.0631076	-0.404459	0.00011232	-0.271231	0.139965	-0.0617703	0.636275
Cross-presentation of particulate exogenous antigens (phagosomes)	CYBB	0.00041976	0	0	0	0.000118131	-0.247065	0.00863425	-0.349667	0.000966662	-0.338888	0.0621922	-0.137865	0.289349
Cross-presentation of particulate exogenous antigens (phagosomes)	CD36	0.00041976	0	0	1	0.00015741	-0.248323	0.00829034	-0.387344	0.0002292	-0.133091	0.47538	-0.154015	0.235978
Cross-presentation of particulate exogenous antigens (phagosomes)	NCF1	2.18205e-05	0	0	1	2.72756e-06	-0.273896	0.00347547	-0.401404	0.000127933	na	na	-0.272155	0.0338501
Cytokine Signaling in Immune system	TEK	0.0486386	0	0	1	0.0048559	-0.144069	0.129646	-0.349411	0.000975588	0.0337272	0.857059	-0.18584	0.151584
Cytokine Signaling in Immune system	GH2	0.0461947	0	0	0	0.0045363	0.282466	0.00254864	0.187474	0.0839021	-0.0705463	0.706089	0.212926	0.0994447
Cytokine Signaling in Immune system	PIK3R1	0.0425583	0	0	1	0.00410956	-0.192326	0.0421977	-0.349325	0.00097858	-0.0107038	0.954427	-0.125712	0.334362
Cytokine Signaling in Immune system	UBE2L6	0.0391372	0	0	0	0.00371515	-0.23746	0.0117016	-0.152027	0.162309	-0.441685	0.0128622	-0.0937542	0.472338
Cytokine Signaling in Immune system	CIITA	0.0383141	0	0	0	0.00355231	-0.195043	0.0393199	-0.337275	0.00149533	-0.168872	0.3638	-0.0862613	0.508601
Cytokine Signaling in Immune system	RASGRP1	0.0383141	0	0	0	0.00357431	-0.150209	0.113921	-0.362883	0.000595106	-0.0914876	0.624504	-0.146761	0.259046
Cytokine Signaling in Immune system	IL34	0.0382628	0	0	0	0.00344428	-0.176817	0.0621835	-0.267941	0.0126238	na	na	-0.229262	0.0755176
Cytokine Signaling in Immune system	HLA-G	0.0373417	0	0	0	0.00327354	-0.22296	0.0181303	-0.158702	0.144436	-0.411997	0.0212793	-0.175779	0.1754
Cytokine Signaling in Immune system	HIST1H3B	0.0373417	0	0	0	0.00328842	0.200874	0.0336956	0.308137	0.00389786	0.15874	0.393696	0.17004	0.190146
Cytokine Signaling in Immune system	OAS2	0.0373417	0	0	0	0.00330025	-0.196699	0.037648	-0.22868	0.034191	-0.469555	0.00769788	0.000503059	0.99693
Cytokine Signaling in Immune system	TNFSF18	0.0371429	0	0	0	0.00309476	-0.252429	0.00725033	-0.14363	0.18706	0.145815	0.433806	-0.30887	0.015436
Cytokine Signaling in Immune system	HLA-E	0.0371429	0	0	0	0.00310031	-0.216748	0.0217061	-0.0683671	0.531666	-0.51439	0.0030717	-0.147449	0.256794
Cytokine Signaling in Immune system	IL1RL2	0.0338285	0	0	0	0.00271293	0.203296	0.0315667	0.339399	0.00138935	0.220943	0.232306	0.0415156	0.750731
Cytokine Signaling in Immune system	TNFRSF1B	0.0292796	0	0	1	0.0023002	-0.200879	0.0336907	-0.316398	0.00299876	0.0450369	0.809887	-0.229315	0.0754482
Cytokine Signaling in Immune system	LAT	0.0290405	0	0	0	0.00223388	-0.180911	0.0562762	-0.258157	0.016402	-0.237302	0.198652	-0.274299	0.032416
Cytokine Signaling in Immune system	VCAM1	0.0268645	0	0	1	0.00202253	-0.178836	0.0592097	-0.369596	0.00046142	-0.0441326	0.813637	-0.15428	0.235164
Cytokine Signaling in Immune system	CSF2RA	0.0247114	0	0	1	0.00181999	-0.243253	0.00975452	-0.2223	0.0396696	-0.278502	0.129239	-0.218142	0.0912379
Cytokine Signaling in Immune system	FCGR1B	0.0217039	0	0	0	0.00156297	-0.245572	0.00905877	-0.212714	0.0492602	na	na	-0.251185	0.0508595
Cytokine Signaling in Immune system	IL17C	0.0208006	0	0	1	0.00146387	0.2366	0.012018	0.274511	0.0105336	-0.175705	0.344422	0.226549	0.0791392
Cytokine Signaling in Immune system	CNTF	0.0206796	0	0	0	0.00142151	0.262098	0.00524407	0.027125	0.804203	0.377866	0.0360978	0.293207	0.0218307
Cytokine Signaling in Immune system	XAF1	0.0179943	0	0	0	0.00120748	-0.276921	0.00311852	-0.283509	0.00816454	na	na	-0.0585931	0.65376
Cytokine Signaling in Immune system	IL12RB1	0.0167757	0	0	0	0.00109825	-0.238123	0.0114627	-0.303931	0.00444223	-0.175907	0.343859	-0.192777	0.136621
Cytokine Signaling in Immune system	SAMHD1	0.016042	1	0	0	0.00102396	-0.228304	0.0154734	-0.330762	0.00186757	-0.0874484	0.639941	-0.202071	0.118351
Cytokine Signaling in Immune system	TNFRSF17	0.0152415	0	0	1	0.000947914	-0.110603	0.245662	-0.43289	3.14334e-05	0.0977483	0.600884	-0.103405	0.427752
Cytokine Signaling in Immune system	GBP1	0.010813	0	0	0	0.000654798	-0.243827	0.00957827	-0.313317	0.00330971	-0.260527	0.156914	-0.149461	0.250287
Cytokine Signaling in Immune system	HAVCR2	0.0100611	0	0	1	0.000592796	-0.282153	0.00257812	-0.228709	0.0341681	-0.302333	0.0983128	-0.197596	0.1269
Cytokine Signaling in Immune system	IFIT3	0.00929062	0	0	0	0.000532196	-0.27704	0.00310509	-0.268491	0.012436	-0.305564	0.0945935	-0.145596	0.262887
Cytokine Signaling in Immune system	SKP1	0.00781957	0	0	0	0.000429836	-0.315175	0.000712378	-0.270529	0.0117609	na	na	-0.0716991	0.58293
Cytokine Signaling in Immune system	FCGR1A	0.00781957	0	0	1	0.000435132	-0.261394	0.00537139	-0.223911	0.038221	-0.363527	0.0444075	-0.224523	0.0819314
Cytokine Signaling in Immune system	PIK3CD	0.00736661	0	0	1	0.000385813	-0.265809	0.0046164	-0.273184	0.0109297	-0.356898	0.0487333	-0.145993	0.261574
Cytokine Signaling in Immune system	HLA-DQB2	0.00666298	0	0	0	0.000338056	-0.283557	0.00244834	-0.299987	0.00501308	-0.126225	0.498646	-0.219492	0.0892024
Cytokine Signaling in Immune system	PML	0.00587896	0	0	1	0.000288656	-0.257308	0.00616604	-0.285405	0.00772976	-0.378674	0.0356699	-0.145225	0.264118
Cytokine Signaling in Immune system	IL18RAP	0.00586693	0	0	0	0.000271889	-0.164163	0.0837022	-0.430549	3.50622e-05	-0.0427187	0.819508	-0.176583	0.173403
Cytokine Signaling in Immune system	PSMB10	0.00586693	0	0	1	0.000272218	-0.261296	0.0053894	-0.274891	0.0104228	-0.308594	0.0912045	-0.224814	0.0815252
Cytokine Signaling in Immune system	CASP1	0.00586693	0	0	1	0.000278463	-0.229832	0.014779	-0.348776	0.000998064	-0.283753	0.121878	-0.153062	0.238925
Cytokine Signaling in Immune system	HCK	0.00425847	0	0	1	0.000181211	-0.241277	0.0103842	-0.307505	0.00397564	-0.346158	0.0564463	-0.207445	0.108673
Cytokine Signaling in Immune system	UBA7	0.00421993	0	0	0	0.000166515	-0.211379	0.0252689	-0.394132	0.000173525	na	na	-0.117371	0.367665
Cytokine Signaling in Immune system	TNFRSF13B	0.00421993	0	0	1	0.000172665	-0.188409	0.0466549	-0.412127	8.0563e-05	0.0699061	0.70864	-0.219217	0.0896154
Cytokine Signaling in Immune system	HLA-DQA1	0.00394907	0	0	1	0.000148656	-0.248918	0.00813199	-0.313971	0.00324138	-0.319298	0.0799668	-0.216156	0.0942971
Cytokine Signaling in Immune system	CD40LG	0.00341854	0	0	1	0.000121364	-0.241576	0.0102866	-0.322267	0.00247799	0.247955	0.178646	-0.27181	0.0340851
Cytokine Signaling in Immune system	VAV1	0.00341854	0	0	1	0.00012309	-0.227008	0.0160848	-0.366372	0.000521745	-0.264567	0.150353	-0.198496	0.125144
Cytokine Signaling in Immune system	IL18R1	0.00322071	0	0	0	0.000105424	-0.222811	0.0182101	-0.408742	9.33833e-05	-0.121378	0.515407	-0.186899	0.149224
Cytokine Signaling in Immune system	HLA-DQA2	0.00314457	0	0	0	9.5639e-05	-0.321413	0.000549246	-0.173843	0.109427	na	na	-0.31277	0.0141202
Cytokine Signaling in Immune system	GBP2	0.00314457	0	0	0	9.77854e-05	-0.258386	0.00594681	-0.342556	0.00124433	-0.370191	0.0403732	-0.109799	0.399582
Cytokine Signaling in Immune system	CD40	0.00227964	0	0	1	6.3427e-05	-0.280147	0.00277448	-0.319916	0.00267599	-0.355448	0.0497225	-0.169504	0.191568
Cytokine Signaling in Immune system	GBP4	0.00178064	0	0	0	4.66288e-05	-0.256957	0.00623891	-0.393801	0.000175926	-0.173483	0.350653	-0.197596	0.1269
Cytokine Signaling in Immune system	CSF1R	0.00142238	0	0	1	3.38055e-05	-0.282342	0.0025603	-0.309449	0.00374072	-0.200344	0.279862	-0.318387	0.0123952
Cytokine Signaling in Immune system	EBI3	0.00142238	0	0	0	3.49192e-05	-0.272527	0.00364877	-0.363215	0.000587743	-0.104413	0.57617	-0.281527	0.0279507
Cytokine Signaling in Immune system	LTB	0.00138229	0	0	1	2.85556e-05	-0.181348	0.0556747	-0.474493	3.92312e-06	-0.113703	0.5425	-0.156239	0.229199
Cytokine Signaling in Immune system	IL18BP	0.00138229	0	0	0	2.94105e-05	-0.251417	0.00749551	-0.389326	0.00021145	-0.284763	0.120499	-0.187773	0.147298
Cytokine Signaling in Immune system	TNFSF13B	0.000903396	0	0	1	1.62641e-05	-0.321096	0.000556619	-0.32203	0.00249733	-0.268606	0.143993	-0.234028	0.0694772
Cytokine Signaling in Immune system	CD27	0.000804352	0	0	1	1.28613e-05	-0.188061	0.0470694	-0.444637	1.79494e-05	na	na	-0.211523	0.101747
Cytokine Signaling in Immune system	LTA	0.000804352	0	0	1	1.31645e-05	-0.312376	0.000799077	-0.348282	0.00101583	-0.090294	0.62905	-0.294554	0.0212042
Cytokine Signaling in Immune system	HLA-DPB1	0.000789044	0	0	0	1.03312e-05	-0.246881	0.00868559	-0.438617	2.3982e-05	-0.196506	0.289366	-0.193598	0.134927
Cytokine Signaling in Immune system	IRF1	0.000567624	0	0	1	6.50306e-06	-0.281837	0.00260824	-0.390795	0.000199114	-0.32034	0.0789325	-0.203845	0.115087
Cytokine Signaling in Immune system	IL2RB	0.000210911	0	0	1	2.07114e-06	-0.268676	0.00417846	-0.451179	1.30194e-05	-0.260326	0.157247	-0.188806	0.145046
Cytokine Signaling in Immune system	TNFSF14	7.74176e-05	0	0	1	5.37955e-07	-0.316236	0.000681811	-0.371975	0.000421063	-0.342927	0.0589461	-0.308813	0.0154559
Cytokine Signaling in Immune system	CD4	7.74176e-05	0	0	1	5.94376e-07	-0.313716	0.000756445	-0.441091	2.13036e-05	-0.15773	0.396751	-0.256639	0.0458767
Cytokine Signaling in Immune system	IL16	7.74176e-05	0	0	0	6.33532e-07	-0.304825	0.00108345	-0.435962	2.72033e-05	-0.234677	0.203812	-0.249438	0.0525464
Cytokine Signaling in Immune system	RASAL3	1.747e-05	0	0	0	4.61178e-08	-0.287185	0.00213968	-0.488942	1.78254e-06	na	na	-0.259234	0.0436509
Cytokine Signaling in Immune system	TRIM22	1.747e-05	0	0	0	5.7185e-08	-0.30856	0.000932919	-0.452317	1.23039e-05	-0.469757	0.00766812	-0.155736	0.23072
Dectin-2 family	FCER1G	0.00968054	0	0	1	0.00290416	-0.237944	0.011527	-0.185096	0.0879759	-0.382309	0.0337947	-0.151474	0.243893
Dectin-2 family	CLEC4A	0.00636349	0	0	0	0.0012727	-0.190157	0.0446197	-0.324372	0.00231201	-0.253863	0.168184	-0.179486	0.166328
Dectin-2 family	PLCG2	0.000466838	0	0	1	4.66838e-05	-0.256919	0.00624695	-0.401708	0.000126297	-0.0838131	0.653962	-0.215839	0.0947939
Downstream TCR signaling	HLA-DPA1	0.031753	0	0	0	0.00517713	-0.219503	0.0200516	-0.270197	0.0118686	-0.119964	0.520347	-0.189071	0.144472
Downstream TCR signaling	PIK3R1	0.0288363	0	0	1	0.00410956	-0.192326	0.0421977	-0.349325	0.00097858	-0.0107038	0.954427	-0.125712	0.334362
Downstream TCR signaling	TRAT1	0.0288363	0	0	0	0.00438813	-0.198736	0.0356739	-0.318882	0.00276743	-0.146622	0.431235	-0.124897	0.337528
Downstream TCR signaling	SKP1	0.00329541	0	0	0	0.000429836	-0.315175	0.000712378	-0.270529	0.0117609	na	na	-0.0716991	0.58293
Downstream TCR signaling	HLA-DQB2	0.00282738	0	0	0	0.000338056	-0.283557	0.00244834	-0.299987	0.00501308	-0.126225	0.498646	-0.219492	0.0892024
Downstream TCR signaling	PSMB10	0.00250441	0	0	1	0.000272218	-0.261296	0.0053894	-0.274891	0.0104228	-0.308594	0.0912045	-0.224814	0.0815252
Downstream TCR signaling	HLA-DQA1	0.00151959	0	0	1	0.000148656	-0.248918	0.00813199	-0.313971	0.00324138	-0.319298	0.0799668	-0.216156	0.0942971
Downstream TCR signaling	HLA-DQA2	0.00109985	0	0	0	9.5639e-05	-0.321413	0.000549246	-0.173843	0.109427	na	na	-0.31277	0.0141202
Downstream TCR signaling	PRKCQ	0.000194424	0	0	1	1.47931e-05	-0.266763	0.00446629	-0.362428	0.00060534	-0.336262	0.0643762	-0.232466	0.0714129
Downstream TCR signaling	HLA-DPB1	0.000158412	0	0	0	1.03312e-05	-0.246881	0.00868559	-0.438617	2.3982e-05	-0.196506	0.289366	-0.193598	0.134927
Downstream TCR signaling	CD3E	9.51731e-05	0	0	1	5.17245e-06	-0.279809	0.00280885	-0.417617	6.31909e-05	-0.20822	0.26099	-0.227488	0.0778698
Downstream TCR signaling	CD3G	7.0623e-05	0	0	1	1.69657e-06	-0.285846	0.00224926	-0.43236	3.2224e-05	-0.11855	0.525311	-0.285261	0.0258546
Downstream TCR signaling	CD3D	7.0623e-05	0	0	1	2.92435e-06	-0.24858	0.00822166	-0.485586	2.14791e-06	-0.0931126	0.618336	-0.178083	0.169721
Downstream TCR signaling	CD247	7.0623e-05	0	0	1	3.07057e-06	-0.250569	0.00770618	-0.483139	2.45751e-06	-0.0605878	0.74611	-0.191718	0.138831
Downstream TCR signaling	CD4	5.46826e-05	0	0	1	5.94376e-07	-0.313716	0.000756445	-0.441091	2.13036e-05	-0.15773	0.396751	-0.256639	0.0458767
FCERI mediated Ca+2 mobilization	MS4A2	0.0187524	0	0	1	0.00625079	-0.124663	0.190322	-0.361357	0.000630071	-0.170656	0.358681	0.0810138	0.534817
FCERI mediated Ca+2 mobilization	FCER1G	0.00958373	0	0	1	0.00290416	-0.237944	0.011527	-0.185096	0.0879759	-0.382309	0.0337947	-0.151474	0.243893
FCERI mediated Ca+2 mobilization	LAT	0.0081909	0	0	0	0.00223388	-0.180911	0.0562762	-0.258157	0.016402	-0.237302	0.198652	-0.274299	0.032416
FCERI mediated Ca+2 mobilization	ITPR1	0.00440617	0	0	1	0.00106816	-0.196549	0.0377967	-0.327443	0.0020877	-0.295063	0.107084	-0.142498	0.273288
FCERI mediated Ca+2 mobilization	FCER1A	0.00292337	0	0	1	0.000620108	-0.192746	0.0417425	-0.362207	0.00061037	-0.252449	0.170647	-0.144227	0.267451
FCERI mediated Ca+2 mobilization	LCP2	0.00201574	0	0	0	0.000357466	-0.258643	0.00589564	-0.296365	0.00559369	-0.308998	0.0907598	-0.168048	0.195468
FCERI mediated Ca+2 mobilization	GRAP2	0.00201574	0	0	0	0.000366499	-0.263401	0.00501562	-0.342613	0.00124184	0.0304959	0.870634	-0.205963	0.11128
FCERI mediated Ca+2 mobilization	VAV1	0.00101549	0	0	1	0.00012309	-0.227008	0.0160848	-0.366372	0.000521745	-0.264567	0.150353	-0.198496	0.125144
FCERI mediated Ca+2 mobilization	PLCG2	0.000513522	0	0	1	4.66838e-05	-0.256919	0.00624695	-0.401708	0.000126297	-0.0838131	0.653962	-0.215839	0.0947939
FCERI mediated Ca+2 mobilization	ITK	0.000153903	0	0	1	9.32745e-06	-0.212966	0.0241671	-0.472388	4.38781e-06	-0.132889	0.476056	-0.189838	0.142819
FCERI mediated Ca+2 mobilization	BTK	3.15514e-05	0	0	1	9.56104e-07	-0.259905	0.00564973	-0.497579	1.09309e-06	-0.139352	0.454669	-0.173714	0.180608
Fcgamma receptor (FCGR) dependent phagocytosis	PIK3R1	0.0210615	0	0	1	0.00410956	-0.192326	0.0421977	-0.349325	0.00097858	-0.0107038	0.954427	-0.125712	0.334362
Fcgamma receptor (FCGR) dependent phagocytosis	ITPR1	0.00583929	0	0	1	0.00106816	-0.196549	0.0377967	-0.327443	0.0020877	-0.295063	0.107084	-0.142498	0.273288
Fcgamma receptor (FCGR) dependent phagocytosis	FGR	0.00562094	0	0	1	0.000959673	-0.186088	0.0494749	-0.273535	0.0108238	-0.430779	0.0155525	-0.152056	0.242064
Fcgamma receptor (FCGR) dependent phagocytosis	FCGR1A	0.00274468	0	0	1	0.000435132	-0.261394	0.00537139	-0.223911	0.038221	-0.363527	0.0444075	-0.224523	0.0819314
Fcgamma receptor (FCGR) dependent phagocytosis	HCK	0.00123828	0	0	1	0.000181211	-0.241277	0.0103842	-0.307505	0.00397564	-0.346158	0.0564463	-0.207445	0.108673
Fcgamma receptor (FCGR) dependent phagocytosis	VAV1	0.000917579	0	0	1	0.00012309	-0.227008	0.0160848	-0.366372	0.000521745	-0.264567	0.150353	-0.198496	0.125144
Fcgamma receptor (FCGR) dependent phagocytosis	PLD4	0.000823374	0	0	0	0.000100411	-0.316479	0.000674969	-0.127822	0.240858	-0.385742	0.0320977	-0.289523	0.0236246
Fcgamma receptor (FCGR) dependent phagocytosis	PLCG2	0.000425342	0	0	1	4.66838e-05	-0.256919	0.00624695	-0.401708	0.000126297	-0.0838131	0.653962	-0.215839	0.0947939
Fcgamma receptor (FCGR) dependent phagocytosis	ELMO1	0.00031618	0	0	0	3.08468e-05	-0.253068	0.00709939	-0.379968	0.000308038	-0.2577	0.161627	-0.222881	0.0842506
Fcgamma receptor (FCGR) dependent phagocytosis	WIPF1	0.000236991	0	0	0	2.02309e-05	-0.248024	0.00837111	-0.416498	6.64202e-05	na	na	-0.146999	0.258265
Fcgamma receptor (FCGR) dependent phagocytosis	NCKAP1L	7.25398e-05	0	0	0	5.30779e-06	-0.272124	0.00370112	-0.430738	3.47544e-05	-0.155105	0.404756	-0.232466	0.0714129
Fcgamma receptor (FCGR) dependent phagocytosis	CD247	5.03573e-05	0	0	1	3.07057e-06	-0.250569	0.00770618	-0.483139	2.45751e-06	-0.0605878	0.74611	-0.191718	0.138831
Fcgamma receptor (FCGR) dependent phagocytosis	BTK	4.19737e-05	0	0	1	9.56104e-07	-0.259905	0.00564973	-0.497579	1.09309e-06	-0.139352	0.454669	-0.173714	0.180608
Fcgamma receptor (FCGR) dependent phagocytosis	CD3G	4.19737e-05	0	0	1	1.69657e-06	-0.285846	0.00224926	-0.43236	3.2224e-05	-0.11855	0.525311	-0.285261	0.0258546
Fcgamma receptor (FCGR) dependent phagocytosis	WAS	4.19737e-05	0	0	0	2.04646e-06	-0.288638	0.00202627	-0.435213	2.81827e-05	-0.180469	0.331287	-0.238056	0.0646794
Fcgamma receptor (FCGR) dependent phagocytosis	CYFIP2	4.19737e-05	0	0	0	2.0475e-06	-0.294882	0.0015983	-0.453407	1.1653e-05	0.0167626	0.928684	-0.232969	0.0707849
FCGR activation	FCGR3A	0.0422028	0	0	1	0.0224534	-0.240866	0.0105195	-0.125641	0.249043	na	na	-0.152241	0.241483
FCGR activation	FCGR2A	0.0422028	0	0	1	0.0227246	-0.206231	0.0291411	-0.213644	0.0482539	-0.236494	0.20023	-0.0915567	0.482827
FCGR activation	FGR	0.00249515	0	0	1	0.000959673	-0.186088	0.0494749	-0.273535	0.0108238	-0.430779	0.0155525	-0.152056	0.242064
FCGR activation	FCGR1A	0.00141418	0	0	1	0.000435132	-0.261394	0.00537139	-0.223911	0.038221	-0.363527	0.0444075	-0.224523	0.0819314
FCGR activation	HCK	0.000785249	0	0	1	0.000181211	-0.241277	0.0103842	-0.307505	0.00397564	-0.346158	0.0564463	-0.207445	0.108673
FCGR activation	CD3G	1.99587e-05	0	0	1	1.69657e-06	-0.285846	0.00224926	-0.43236	3.2224e-05	-0.11855	0.525311	-0.285261	0.0258546
FCGR activation	CD247	1.99587e-05	0	0	1	3.07057e-06	-0.250569	0.00770618	-0.483139	2.45751e-06	-0.0605878	0.74611	-0.191718	0.138831
Generation of second messenger molecules	HLA-DQB1	0.0374207	0	0	0	0.0258074	-0.149144	0.116538	-0.229733	0.0333514	-0.296274	0.105583	-0.110355	0.397184
Generation of second messenger molecules	ZAP70	0.033462	0	0	1	0.0219234	-0.202646	0.0321267	-0.177853	0.10136	-0.0743285	0.691082	-0.244645	0.0574072
Generation of second messenger molecules	HLA-DRA	0.01671	0	0	1	0.0103717	-0.21567	0.0223847	-0.244627	0.0232081	-0.166414	0.370925	-0.153777	0.236713
Generation of second messenger molecules	HLA-DPA1	0.00883157	0	0	0	0.00517713	-0.219503	0.0200516	-0.270197	0.0118686	-0.119964	0.520347	-0.189071	0.144472
Generation of second messenger molecules	LAT	0.00404891	0	0	0	0.00223388	-0.180911	0.0562762	-0.258157	0.016402	-0.237302	0.198652	-0.274299	0.032416
Generation of second messenger molecules	HLA-DQB2	0.000708565	0	0	0	0.000338056	-0.283557	0.00244834	-0.299987	0.00501308	-0.126225	0.498646	-0.219492	0.0892024
Generation of second messenger molecules	LCP2	0.000708565	0	0	0	0.000357466	-0.258643	0.00589564	-0.296365	0.00559369	-0.308998	0.0907598	-0.168048	0.195468
Generation of second messenger molecules	GRAP2	0.000708565	0	0	0	0.000366499	-0.263401	0.00501562	-0.342613	0.00124184	0.0304959	0.870634	-0.205963	0.11128
Generation of second messenger molecules	HLA-DQA1	0.000359251	0	0	1	0.000148656	-0.248918	0.00813199	-0.313971	0.00324138	-0.319298	0.0799668	-0.216156	0.0942971
Generation of second messenger molecules	HLA-DQA2	0.000252139	0	0	0	9.5639e-05	-0.321413	0.000549246	-0.173843	0.109427	na	na	-0.31277	0.0141202
Generation of second messenger molecules	FYB	2.99604e-05	0	0	0	8.7933e-06	-0.289983	0.00192617	-0.396616	0.00015649	-0.344341	0.0578419	-0.113029	0.385773
Generation of second messenger molecules	ITK	2.99604e-05	0	0	1	9.32745e-06	-0.212966	0.0241671	-0.472388	4.38781e-06	-0.132889	0.476056	-0.189838	0.142819
Generation of second messenger molecules	HLA-DPB1	2.99604e-05	0	0	0	1.03312e-05	-0.246881	0.00868559	-0.438617	2.3982e-05	-0.196506	0.289366	-0.193598	0.134927
Generation of second messenger molecules	CD3E	2.14287e-05	0	0	1	5.17245e-06	-0.279809	0.00280885	-0.417617	6.31909e-05	-0.20822	0.26099	-0.227488	0.0778698
Generation of second messenger molecules	CD3D	1.48411e-05	0	0	1	2.92435e-06	-0.24858	0.00822166	-0.485586	2.14791e-06	-0.0931126	0.618336	-0.178083	0.169721
Generation of second messenger molecules	CD247	1.48411e-05	0	0	1	3.07057e-06	-0.250569	0.00770618	-0.483139	2.45751e-06	-0.0605878	0.74611	-0.191718	0.138831
Generation of second messenger molecules	CD3G	1.48368e-05	0	0	1	1.69657e-06	-0.285846	0.00224926	-0.43236	3.2224e-05	-0.11855	0.525311	-0.285261	0.0258546
Generation of second messenger molecules	WAS	1.48368e-05	0	0	0	2.04646e-06	-0.288638	0.00202627	-0.435213	2.81827e-05	-0.180469	0.331287	-0.238056	0.0646794
Generation of second messenger molecules	CD4	1.07524e-05	0	0	1	5.94376e-07	-0.313716	0.000756445	-0.441091	2.13036e-05	-0.15773	0.396751	-0.256639	0.0458767
Generation of second messenger molecules	EVL	1.07524e-05	0	0	0	7.41543e-07	-0.278097	0.00298883	-0.466737	5.90453e-06	-0.3092	0.090538	-0.153751	0.236794
Immunoregulatory interactions between a Lymphoid and a non-Lymphoid cell	CD300LG	0.0473967	0	0	0	0.0276561	-0.11251	0.237568	-0.10759	0.324124	0.145254	0.435594	-0.352259	0.00536663
Immunoregulatory interactions between a Lymphoid and a non-Lymphoid cell	CRTAM	0.0473967	0	0	0	0.0278402	-0.197473	0.0368869	-0.204153	0.0593699	-0.224579	0.224516	-0.116899	0.369609
Immunoregulatory interactions between a Lymphoid and a non-Lymphoid cell	KLRG1	0.0473967	0	0	0	0.0279302	-0.137944	0.14694	-0.278114	0.00952121	0.00262547	0.988816	-0.195046	0.131977
Immunoregulatory interactions between a Lymphoid and a non-Lymphoid cell	FCGR3A	0.0399172	0	0	1	0.0224534	-0.240866	0.0105195	-0.125641	0.249043	na	na	-0.152241	0.241483
Immunoregulatory interactions between a Lymphoid and a non-Lymphoid cell	LAIR2	0.0378871	0	0	0	0.0209732	-0.0926354	0.331322	-0.270615	0.0117334	-0.303141	0.0973728	-0.12933	0.320525
Immunoregulatory interactions between a Lymphoid and a non-Lymphoid cell	ICAM1	0.031886	0	0	1	0.0173665	-0.190572	0.0441476	-0.132126	0.22525	-0.416642	0.0197224	-0.0933306	0.47435
Immunoregulatory interactions between a Lymphoid and a non-Lymphoid cell	ICAM3	0.0311831	0	0	1	0.0167052	-0.0768886	0.420371	-0.354455	0.000812817	-0.0242351	0.897034	-0.138394	0.287483
Immunoregulatory interactions between a Lymphoid and a non-Lymphoid cell	LILRA5	0.0268814	0	0	0	0.0141607	-0.198577	0.0358241	-0.206827	0.0560456	-0.133495	0.474029	-0.230771	0.0735612
Immunoregulatory interactions between a Lymphoid and a non-Lymphoid cell	SIGLEC8	0.0192336	0	0	0	0.00996026	-0.211261	0.0253521	-0.263381	0.0142786	-0.0044431	0.981075	-0.200376	0.121535
Immunoregulatory interactions between a Lymphoid and a non-Lymphoid cell	B2M	0.0172459	0	0	1	0.00877691	-0.274208	0.00343699	-0.162115	0.13589	-0.251566	0.172199	-0.0981229	0.451854
Immunoregulatory interactions between a Lymphoid and a non-Lymphoid cell	LILRB4	0.0168848	0	0	0	0.00844238	-0.230418	0.0145198	-0.235213	0.0292546	-0.203373	0.272502	-0.135482	0.297846
Immunoregulatory interactions between a Lymphoid and a non-Lymphoid cell	IFITM1	0.0153606	0	0	0	0.00754317	-0.196797	0.0375505	-0.243755	0.0237194	-0.328992	0.0707378	-0.0942573	0.469954
Immunoregulatory interactions between a Lymphoid and a non-Lymphoid cell	KLRD1	0.0121802	0	0	0	0.0058726	-0.192678	0.0418156	-0.25681	0.0169915	-0.263355	0.1523	-0.168013	0.195563
Immunoregulatory interactions between a Lymphoid and a non-Lymphoid cell	KLRF1	0.010421	0	0	0	0.00488965	-0.237202	0.0117956	-0.257025	0.0168964	-0.0999699	0.592595	-0.190968	0.140413
Immunoregulatory interactions between a Lymphoid and a non-Lymphoid cell	SIGLEC12	0.010421	0	0	0	0.00493137	-0.188874	0.0461066	-0.159773	0.141711	na	na	-0.31277	0.0141202
Immunoregulatory interactions between a Lymphoid and a non-Lymphoid cell	KLRK1	0.00809533	0	0	0	0.00368627	-0.260132	0.00560652	-0.168467	0.121012	-0.314047	0.0853384	-0.167386	0.197259
Immunoregulatory interactions between a Lymphoid and a non-Lymphoid cell	FCGR2B	0.00756092	0	0	1	0.00337541	-0.24573	0.00901291	-0.217616	0.0441411	-0.219328	0.235826	-0.207578	0.108442
Immunoregulatory interactions between a Lymphoid and a non-Lymphoid cell	HLA-G	0.00748237	0	0	0	0.00327354	-0.22296	0.0181303	-0.158702	0.144436	-0.411997	0.0212793	-0.175779	0.1754
Immunoregulatory interactions between a Lymphoid and a non-Lymphoid cell	HLA-E	0.00723405	0	0	0	0.00310031	-0.216748	0.0217061	-0.0683671	0.531666	-0.51439	0.0030717	-0.147449	0.256794
Immunoregulatory interactions between a Lymphoid and a non-Lymphoid cell	CLEC2D	0.00714363	0	0	0	0.00299777	-0.25537	0.00657824	-0.21937	0.0424199	-0.308019	0.0918404	-0.124282	0.339933
Immunoregulatory interactions between a Lymphoid and a non-Lymphoid cell	NCR3	0.00676703	0	0	0	0.00277932	-0.244575	0.00935246	-0.230975	0.032383	-0.19693	0.288306	-0.218696	0.0903981
Immunoregulatory interactions between a Lymphoid and a non-Lymphoid cell	ITGA4	0.0052774	0	0	1	0.00212039	-0.213565	0.0237621	-0.325576	0.00222162	-0.198324	0.284839	-0.116921	0.369518
Immunoregulatory interactions between a Lymphoid and a non-Lymphoid cell	VCAM1	0.00514826	0	0	1	0.00202253	-0.178836	0.0592097	-0.369596	0.00046142	-0.0441326	0.813637	-0.15428	0.235164
Immunoregulatory interactions between a Lymphoid and a non-Lymphoid cell	SIGLEC5	0.00426806	0	0	0	0.00163863	-0.281644	0.00262672	-0.076132	0.485991	-0.268202	0.14462	-0.293707	0.0215965
Immunoregulatory interactions between a Lymphoid and a non-Lymphoid cell	CD22	0.00417881	0	0	1	0.00154908	-0.228612	0.0153311	-0.281432	0.00866515	na	na	-0.178374	0.169013
Immunoregulatory interactions between a Lymphoid and a non-Lymphoid cell	SIGLEC9	0.00417881	0	0	0	0.00156706	-0.268826	0.00415664	-0.0824653	0.45034	-0.387964	0.031037	-0.237947	0.0648057
Immunoregulatory interactions between a Lymphoid and a non-Lymphoid cell	CD200R1	0.00302502	0	0	0	0.00107419	-0.281356	0.00265459	-0.210458	0.051776	-0.202161	0.275431	-0.240915	0.0614376
Immunoregulatory interactions between a Lymphoid and a non-Lymphoid cell	CD300C	0.00302502	0	0	0	0.00108037	-0.280604	0.00272853	-0.130809	0.229951	-0.310209	0.0894353	-0.261537	0.0417502
Immunoregulatory interactions between a Lymphoid and a non-Lymphoid cell	CD226	0.00257841	0	0	0	0.000858217	-0.257701	0.00608537	-0.280674	0.00885463	-0.0723014	0.699111	-0.255971	0.0464644
Immunoregulatory interactions between a Lymphoid and a non-Lymphoid cell	SIGLEC7	0.00257841	0	0	0	0.000874819	-0.285276	0.00229733	-0.220953	0.0409145	-0.20923	0.258633	-0.230613	0.0737652
Immunoregulatory interactions between a Lymphoid and a non-Lymphoid cell	TREM2	0.00228898	0	0	0	0.000735744	-0.298052	0.00141404	-0.22996	0.0331722	-0.172473	0.353508	-0.221028	0.0869311
Immunoregulatory interactions between a Lymphoid and a non-Lymphoid cell	SIGLEC1	0.00215145	0	0	0	0.000644263	-0.285764	0.00225607	-0.197308	0.0686176	-0.232657	0.207844	-0.266462	0.0379149
Immunoregulatory interactions between a Lymphoid and a non-Lymphoid cell	SH2D1A	0.00215145	0	0	0	0.000659833	-0.195347	0.0390087	-0.387164	0.00023088	-0.114219	0.540656	-0.147032	0.258158
Immunoregulatory interactions between a Lymphoid and a non-Lymphoid cell	SELL	0.00215145	0	0	1	0.000672327	-0.191599	0.0429973	-0.373758	0.000392984	-0.163789	0.378626	-0.165956	0.201168
Immunoregulatory interactions between a Lymphoid and a non-Lymphoid cell	CD300LB	0.00196275	0	0	0	0.000560785	-0.264428	0.00484173	-0.250885	0.0198082	-0.304151	0.0962073	-0.206058	0.111111
Immunoregulatory interactions between a Lymphoid and a non-Lymphoid cell	LILRB1	0.0019064	0	0	0	0.000518935	-0.257617	0.00610257	-0.304139	0.00441372	-0.232455	0.20825	-0.179674	0.165878
Immunoregulatory interactions between a Lymphoid and a non-Lymphoid cell	CD300LF	0.0019064	0	0	0	0.000527665	-0.217903	0.0209987	-0.320342	0.00263904	-0.221291	0.231554	-0.230401	0.0740379
Immunoregulatory interactions between a Lymphoid and a non-Lymphoid cell	FCGR1A	0.00168051	0	0	1	0.000435132	-0.261394	0.00537139	-0.223911	0.038221	-0.363527	0.0444075	-0.224523	0.0819314
Immunoregulatory interactions between a Lymphoid and a non-Lymphoid cell	SLAMF7	0.00152712	0	0	1	0.000381781	-0.228698	0.0152918	-0.359973	0.000663391	-0.0910836	0.626041	-0.212608	0.0999617
Immunoregulatory interactions between a Lymphoid and a non-Lymphoid cell	SIGLEC10	0.00132986	0	0	0	0.00032059	-0.212624	0.0244011	-0.36348	0.000581914	-0.255882	0.16471	-0.159814	0.218589
Immunoregulatory interactions between a Lymphoid and a non-Lymphoid cell	LILRB2	0.00122742	0	0	0	0.000284937	-0.257946	0.00603556	-0.272312	0.011197	-0.212259	0.251644	-0.285022	0.0259843
Immunoregulatory interactions between a Lymphoid and a non-Lymphoid cell	LAIR1	0.00117539	0	0	0	0.000262364	-0.323809	0.000496296	-0.0939372	0.389627	-0.316066	0.0832407	-0.287246	0.0247947
Immunoregulatory interactions between a Lymphoid and a non-Lymphoid cell	CD1C	0.000701886	0	0	0	0.000150404	-0.18329	0.0530613	-0.398152	0.000146744	-0.291154	0.112037	-0.155604	0.231122
Immunoregulatory interactions between a Lymphoid and a non-Lymphoid cell	CD40LG	0.000590988	0	0	1	0.000121364	-0.241576	0.0102866	-0.322267	0.00247799	0.247955	0.178646	-0.27181	0.0340851
Immunoregulatory interactions between a Lymphoid and a non-Lymphoid cell	ITGB7	0.000576222	0	0	1	0.000113187	-0.246616	0.00876009	-0.399565	0.000138278	-0.04999	0.789422	-0.186952	0.149107
Immunoregulatory interactions between a Lymphoid and a non-Lymphoid cell	CD40	0.00034677	0	0	1	6.3427e-05	-0.280147	0.00277448	-0.319916	0.00267599	-0.355448	0.0497225	-0.169504	0.191568
Immunoregulatory interactions between a Lymphoid and a non-Lymphoid cell	C3	0.00034677	0	0	1	6.50194e-05	-0.302104	0.00120668	-0.268832	0.0123207	na	na	-0.268226	0.036614
Immunoregulatory interactions between a Lymphoid and a non-Lymphoid cell	CD33	0.000257705	0	0	1	4.36263e-05	-0.237986	0.0115117	-0.394151	0.000173389	-0.358817	0.047448	-0.0929599	0.476115
Immunoregulatory interactions between a Lymphoid and a non-Lymphoid cell	TYROBP	0.000257705	0	0	0	4.37179e-05	-0.315179	0.000712252	-0.214611	0.0472247	-0.360295	0.0464762	-0.279886	0.0289166
Immunoregulatory interactions between a Lymphoid and a non-Lymphoid cell	SIGLEC11	0.000184383	0	0	0	2.79867e-05	-0.276997	0.00310993	-0.234066	0.0300751	-0.398102	0.0265519	-0.324701	0.0106763
Immunoregulatory interactions between a Lymphoid and a non-Lymphoid cell	ITGB2	0.000174108	0	0	1	2.48725e-05	-0.300832	0.00126862	-0.296508	0.00556958	-0.345956	0.0566	-0.24446	0.0576023
Immunoregulatory interactions between a Lymphoid and a non-Lymphoid cell	CD19	0.000116651	0	0	1	1.56229e-05	-0.182697	0.0538484	-0.473696	4.09321e-06	0.0537212	0.774095	-0.227606	0.0777116
Immunoregulatory interactions between a Lymphoid and a non-Lymphoid cell	LILRA1	8.21145e-05	0	0	0	1.02643e-05	-0.310257	0.000871056	-0.213445	0.0484681	-0.455666	0.00999355	-0.299272	0.0191286
Immunoregulatory interactions between a Lymphoid and a non-Lymphoid cell	CD300A	7.35258e-05	0	0	0	7.60859e-06	-0.306331	0.00102027	-0.263438	0.0142568	-0.413411	0.0207951	-0.300167	0.0187552
Immunoregulatory interactions between a Lymphoid and a non-Lymphoid cell	ITGAL	7.35258e-05	0	0	1	8.19408e-06	-0.260996	0.00544455	-0.428463	3.86195e-05	-0.200465	0.279565	-0.209405	0.105301
Immunoregulatory interactions between a Lymphoid and a non-Lymphoid cell	CD8A	7.35258e-05	0	0	0	8.53425e-06	-0.248049	0.00836416	-0.391421	0.000194066	-0.352015	0.0521291	-0.228336	0.0767392
Immunoregulatory interactions between a Lymphoid and a non-Lymphoid cell	CD3E	5.79315e-05	0	0	1	5.17245e-06	-0.279809	0.00280885	-0.417617	6.31909e-05	-0.20822	0.26099	-0.227488	0.0778698
Immunoregulatory interactions between a Lymphoid and a non-Lymphoid cell	CD3D	3.82115e-05	0	0	1	2.92435e-06	-0.24858	0.00822166	-0.485586	2.14791e-06	-0.0931126	0.618336	-0.178083	0.169721
Immunoregulatory interactions between a Lymphoid and a non-Lymphoid cell	CD247	3.82115e-05	0	0	1	3.07057e-06	-0.250569	0.00770618	-0.483139	2.45751e-06	-0.0605878	0.74611	-0.191718	0.138831
Immunoregulatory interactions between a Lymphoid and a non-Lymphoid cell	SLAMF6	2.71451e-05	0	0	1	1.54182e-06	-0.200841	0.0337255	-0.518826	3.09552e-07	-0.0585682	0.754309	-0.205619	0.111892
Immunoregulatory interactions between a Lymphoid and a non-Lymphoid cell	CD3G	2.71451e-05	0	0	1	1.69657e-06	-0.285846	0.00224926	-0.43236	3.2224e-05	-0.11855	0.525311	-0.285261	0.0258546
Immunoregulatory interactions between a Lymphoid and a non-Lymphoid cell	CD96	2.23034e-05	0	0	0	9.95685e-07	-0.253684	0.00695644	-0.489662	1.71215e-06	-0.0713998	0.702692	-0.239085	0.0634968
Immunoregulatory interactions between a Lymphoid and a non-Lymphoid cell	KLRB1	2.19958e-05	0	0	0	4.67402e-07	-0.238793	0.0112256	-0.519698	2.93383e-07	-0.0898719	0.63066	-0.208322	0.107154
Immunoregulatory interactions between a Lymphoid and a non-Lymphoid cell	CLEC2B	2.19958e-05	0	0	0	6.60576e-07	-0.303161	0.0011574	-0.411653	8.22544e-05	-0.471575	0.00740466	-0.0942838	0.469829
Immunoregulatory interactions between a Lymphoid and a non-Lymphoid cell	HCST	2.19958e-05	0	0	0	7.85565e-07	-0.301586	0.00123156	-0.37628	0.000356183	-0.372009	0.0393256	-0.289894	0.0234386
Immunoregulatory interactions between a Lymphoid and a non-Lymphoid cell	CD1D	6.70798e-07	0	0	0	5.98926e-09	-0.298159	0.00140818	-0.488401	1.83712e-06	-0.351849	0.0522481	-0.320263	0.0118613
Inflammasomes	NLRC4	0.0110238	0	0	0	0.00453923	-0.200811	0.0337526	-0.259693	0.0157511	na	na	-0.183616	0.15663
Inflammasomes	BCL2	0.00672354	0	0	1	0.00237302	-0.157692	0.096805	-0.383997	0.000262327	-0.0688681	0.712782	-0.120458	0.355115
Inflammasomes	PSTPIP1	0.00271093	0	0	0	0.000797332	-0.195026	0.0393375	-0.324808	0.0022789	-0.20923	0.258633	-0.234584	0.0687984
Inflammasomes	CASP1	0.00237262	0	0	1	0.000278463	-0.229832	0.014779	-0.348776	0.000998064	-0.283753	0.121878	-0.153062	0.238925
Inflammasomes	NLRP3	0.00237262	0	0	1	0.000358359	-0.248802	0.00816254	-0.293843	0.00603243	na	na	-0.225847	0.080098
Inflammasomes	P2RX7	0.00237262	0	0	1	0.000472607	-0.252037	0.00734447	-0.262689	0.0145454	-0.356862	0.0487576	-0.18261	0.158953
Inflammasomes	AIM2	0.00237262	0	0	0	0.000558264	-0.152665	0.108063	-0.323035	0.00241623	-0.470565	0.00755006	-0.0845403	0.517126
Initial triggering of complement	CRP	0.0258178	0	0	1	0.0135883	-0.269234	0.00409764	0.0176438	0.871904	-0.249951	0.175061	-0.209157	0.105722
Initial triggering of complement	FCN1	0.0152972	0	0	0	0.00724604	-0.142324	0.134407	-0.281565	0.00863236	-0.201879	0.276117	-0.220604	0.0875531
Initial triggering of complement	CFP	0.00665527	0	0	0	0.00280222	-0.22222	0.0185277	-0.155677	0.152342	-0.0480663	0.797354	-0.367789	0.00354491
Initial triggering of complement	C1S	0.00107191	0	0	1	0.000394915	-0.243737	0.00960571	-0.313241	0.00331772	-0.311219	0.0883429	-0.15428	0.235164
Initial triggering of complement	C1R	0.000873135	0	0	1	0.000275727	-0.267491	0.0043548	-0.327842	0.0020601	na	na	-0.128571	0.323395
Initial triggering of complement	C3	0.000247074	0	0	1	6.50194e-05	-0.302104	0.00120668	-0.268832	0.0123207	na	na	-0.268226	0.036614
Initial triggering of complement	C1QB	7.40849e-05	0	0	1	1.55968e-05	-0.331001	0.00036425	-0.2318	0.0317529	-0.36797	0.0416839	-0.282401	0.0274478
Initial triggering of complement	C1QC	5.03799e-05	0	0	0	7.95472e-06	-0.348949	0.000162764	-0.212032	0.0500104	-0.350399	0.053293	-0.313829	0.01378
Initial triggering of complement	C1QA	1.09232e-05	0	0	1	9.33439e-07	-0.318687	0.000615758	-0.362656	0.000600203	-0.406746	0.0231598	-0.244433	0.0576302
Initial triggering of complement	GZMM	1.09232e-05	0	0	0	1.14981e-06	-0.327471	0.000424368	-0.348937	0.000992317	-0.146738	0.430868	-0.368689	0.00345856
Innate Immune System	TEK	0.0449273	0	0	1	0.0048559	-0.144069	0.129646	-0.349411	0.000975588	0.0337272	0.857059	-0.18584	0.151584
Innate Immune System	STK10	0.0446352	0	0	1	0.0047838	-0.216983	0.0215604	-0.304376	0.00438152	-0.162493	0.382463	-0.0994203	0.445866
Innate Immune System	NLRC4	0.0427153	0	0	0	0.00453923	-0.200811	0.0337526	-0.259693	0.0157511	na	na	-0.183616	0.15663
Innate Immune System	TRAT1	0.0416494	0	0	0	0.00438813	-0.198736	0.0356739	-0.318882	0.00276743	-0.146622	0.431235	-0.124897	0.337528
Innate Immune System	PIK3R1	0.0393445	0	0	1	0.00410956	-0.192326	0.0421977	-0.349325	0.00097858	-0.0107038	0.954427	-0.125712	0.334362
Innate Immune System	CHI3L1	0.0373865	0	0	1	0.00387108	-0.163768	0.0844593	-0.177863	0.101341	-0.498234	0.00433794	-0.127353	0.328038
Innate Immune System	DEFA4	0.0368178	0	0	1	0.00377876	0.320622	0.000567825	-0.0467459	0.669093	-0.361352	0.0457918	-0.0542064	0.678206
Innate Immune System	KLRK1	0.0365213	0	0	0	0.00368627	-0.260132	0.00560652	-0.168467	0.121012	-0.314047	0.0853384	-0.167386	0.197259
Innate Immune System	UBE2L6	0.0365213	0	0	0	0.00371515	-0.23746	0.0117016	-0.152027	0.162309	-0.441685	0.0128622	-0.0937542	0.472338
Innate Immune System	RASGRP1	0.0357756	0	0	0	0.00357431	-0.150209	0.113921	-0.362883	0.000595106	-0.0914876	0.624504	-0.146761	0.259046
Innate Immune System	MAPK10	0.0342244	0	0	1	0.00338825	-0.166835	0.0787212	-0.301551	0.0047793	-0.296072	0.105832	-0.147449	0.256794
Innate Immune System	ZBP1	0.0337993	0	0	0	0.00331546	-0.16488	0.0823411	-0.368221	0.000486319	-0.0728137	0.697079	-0.120231	0.356027
Innate Immune System	MAPK14	0.0334816	0	0	1	0.00325389	0.216166	0.0220701	0.327538	0.0020811	0.154095	0.407859	0.0844344	0.517653
Innate Immune System	HLA-E	0.0322023	0	0	0	0.00310031	-0.216748	0.0217061	-0.0683671	0.531666	-0.51439	0.0030717	-0.147449	0.256794
Innate Immune System	LY96	0.0316251	0	0	1	0.00301601	-0.234699	0.0127438	-0.229372	0.0336369	-0.291831	0.111166	-0.172287	0.184272
Innate Immune System	FCER1G	0.030745	0	0	1	0.00290416	-0.237944	0.011527	-0.185096	0.0879759	-0.382309	0.0337947	-0.151474	0.243893
Innate Immune System	CFP	0.0299538	0	0	0	0.00280222	-0.22222	0.0185277	-0.155677	0.152342	-0.0480663	0.797354	-0.367789	0.00354491
Innate Immune System	BCL2	0.0256146	0	0	1	0.00237302	-0.157692	0.096805	-0.383997	0.000262327	-0.0688681	0.712782	-0.120458	0.355115
Innate Immune System	TNFRSF1B	0.0252199	0	0	1	0.0023002	-0.200879	0.0336907	-0.316398	0.00299876	0.0450369	0.809887	-0.229315	0.0754482
Innate Immune System	MAPK13	0.0252199	0	0	1	0.00231354	0.262849	0.00511132	0.291653	0.00643786	0.232378	0.208406	0.0152771	0.906974
Innate Immune System	LAT	0.0249987	0	0	0	0.00223388	-0.180911	0.0562762	-0.258157	0.016402	-0.237302	0.198652	-0.274299	0.032416
Innate Immune System	AP1M1	0.0249987	0	0	0	0.00224784	-0.239	0.0111533	-0.323708	0.00236323	-0.0252449	0.892768	-0.148111	0.254641
Innate Immune System	TLR8	0.0233555	0	0	1	0.00205766	-0.189203	0.0457211	-0.317081	0.00293352	-0.197112	0.287852	-0.191904	0.138442
Innate Immune System	IFI16	0.0215468	0	0	0	0.00187874	-0.184214	0.0518538	-0.370648	0.000443155	-0.204989	0.268629	-0.038206	0.770033
Innate Immune System	CFH	0.0215233	0	0	0	0.00185714	-0.225181	0.0169819	-0.32422	0.00232363	-0.232253	0.208657	-0.0743997	0.56878
Innate Immune System	CSF2RA	0.0213171	0	0	1	0.00181999	-0.243253	0.00975452	-0.2223	0.0396696	-0.278502	0.129239	-0.218142	0.0912379
Innate Immune System	SIGLEC5	0.0193993	0	0	0	0.00163863	-0.281644	0.00262672	-0.076132	0.485991	-0.268202	0.14462	-0.293707	0.0215965
Innate Immune System	SIGLEC9	0.0187536	0	0	0	0.00156706	-0.268826	0.00415664	-0.0824653	0.45034	-0.387964	0.031037	-0.237947	0.0648057
Innate Immune System	CLEC4A	0.0153982	0	0	0	0.0012727	-0.190157	0.0446197	-0.324372	0.00231201	-0.253863	0.168184	-0.179486	0.166328
Innate Immune System	TLR10	0.0145538	0	0	0	0.00118968	-0.189821	0.0450055	-0.364372	0.000562726	-0.173483	0.350653	-0.135383	0.298201
Innate Immune System	ITPR1	0.013273	0	0	1	0.00106816	-0.196549	0.0377967	-0.327443	0.0020877	-0.295063	0.107084	-0.142498	0.273288
Innate Immune System	LTF	0.013273	0	0	1	0.00107293	-0.221489	0.0189279	-0.272956	0.0109989	na	na	-0.234081	0.0694123
Innate Immune System	ITGAX	0.0131677	0	0	1	0.0010405	-0.229513	0.0149214	-0.266852	0.013003	-0.38857	0.0307527	-0.115756	0.374339
Innate Immune System	FGR	0.012286	0	0	1	0.000959673	-0.186088	0.0494749	-0.273535	0.0108238	-0.430779	0.0155525	-0.152056	0.242064
Innate Immune System	PSTPIP1	0.0104946	0	0	0	0.000797332	-0.195026	0.0393375	-0.324808	0.0022789	-0.20923	0.258633	-0.234584	0.0687984
Innate Immune System	PDE1A	0.0104946	0	0	1	0.000801787	-0.220547	0.0194538	-0.362457	0.000604696	-0.0723014	0.699111	-0.168101	0.195325
Innate Immune System	C16ORF62	0.0104946	0	0	0	0.000810207	-0.21164	0.0250845	-0.359498	0.000675167	na	na	-0.066537	0.610412
Innate Immune System	TREM2	0.00987871	0	0	0	0.000735744	-0.298052	0.00141404	-0.22996	0.0331722	-0.172473	0.353508	-0.221028	0.0869311
Innate Immune System	SELL	0.00914749	0	0	1	0.000672327	-0.191599	0.0429973	-0.373758	0.000392984	-0.163789	0.378626	-0.165956	0.201168
Innate Immune System	CD68	0.00914749	0	0	0	0.000672976	-0.283082	0.00249158	-0.179787	0.0976395	-0.171801	0.355416	-0.310414	0.0149031
Innate Immune System	FCER1A	0.00864226	0	0	1	0.000620108	-0.192746	0.0417425	-0.362207	0.00061037	-0.252449	0.170647	-0.144227	0.267451
Innate Immune System	CYLD	0.00821011	0	0	0	0.000581643	-0.196682	0.0376649	-0.405121	0.000109179	-0.195699	0.291393	-0.0171569	0.895587
Innate Immune System	AIM2	0.0080185	0	0	0	0.000558264	-0.152665	0.108063	-0.323035	0.00241623	-0.470565	0.00755006	-0.0845403	0.517126
Innate Immune System	CD300LB	0.0080185	0	0	0	0.000560785	-0.264428	0.00484173	-0.250885	0.0198082	-0.304151	0.0962073	-0.206058	0.111111
Innate Immune System	P2RX7	0.00693786	0	0	1	0.000472607	-0.252037	0.00734447	-0.262689	0.0145454	-0.356862	0.0487576	-0.18261	0.158953
Innate Immune System	SKP1	0.00647405	0	0	0	0.000429836	-0.315175	0.000712378	-0.270529	0.0117609	na	na	-0.0716991	0.58293
Innate Immune System	TRPM2	0.00647405	0	0	1	0.000429861	0.240708	0.010572	0.331075	0.00184794	0.328386	0.0712892	0.0823163	0.528249
Innate Immune System	FCGR1A	0.00647405	0	0	1	0.000435132	-0.261394	0.00537139	-0.223911	0.038221	-0.363527	0.0444075	-0.224523	0.0819314
Innate Immune System	C1S	0.00612396	0	0	1	0.000394915	-0.243737	0.00960571	-0.313241	0.00331772	-0.311219	0.0883429	-0.15428	0.235164
Innate Immune System	PIK3CD	0.00606828	0	0	1	0.000385813	-0.265809	0.0046164	-0.273184	0.0109297	-0.356898	0.0487333	-0.145993	0.261574
Innate Immune System	GRAP2	0.00584805	0	0	0	0.000366499	-0.263401	0.00501562	-0.342613	0.00124184	0.0304959	0.870634	-0.205963	0.11128
Innate Immune System	LCP2	0.00583171	0	0	0	0.000357466	-0.258643	0.00589564	-0.296365	0.00559369	-0.308998	0.0907598	-0.168048	0.195468
Innate Immune System	NLRP3	0.00583171	0	0	1	0.000358359	-0.248802	0.00816254	-0.293843	0.00603243	na	na	-0.225847	0.080098
Innate Immune System	MNDA	0.00583171	0	0	0	0.000360178	-0.236994	0.0118722	-0.310548	0.00361335	-0.338282	0.062691	-0.15947	0.219596
Innate Immune System	LILRB2	0.00482639	0	0	0	0.000284937	-0.257946	0.00603556	-0.272312	0.011197	-0.212259	0.251644	-0.285022	0.0259843
Innate Immune System	PSMB10	0.00479044	0	0	1	0.000272218	-0.261296	0.0053894	-0.274891	0.0104228	-0.308594	0.0912045	-0.224814	0.0815252
Innate Immune System	C1R	0.00479044	0	0	1	0.000275727	-0.267491	0.0043548	-0.327842	0.0020601	na	na	-0.128571	0.323395
Innate Immune System	CASP1	0.00479044	0	0	1	0.000278463	-0.229832	0.014779	-0.348776	0.000998064	-0.283753	0.121878	-0.153062	0.238925
Innate Immune System	LAIR1	0.00473546	0	0	0	0.000262364	-0.323809	0.000496296	-0.0939372	0.389627	-0.316066	0.0832407	-0.287246	0.0247947
Innate Immune System	GNLY	0.00466556	0	0	0	0.000254254	-0.264231	0.00487471	-0.250392	0.0200596	-0.354237	0.0505616	-0.227647	0.0776568
Innate Immune System	PTPRC	0.00438528	0	0	1	0.000231876	-0.216414	0.0219142	-0.383106	0.000271863	-0.244169	0.185587	-0.132146	0.310011
Innate Immune System	PLEKHO2	0.00438528	0	0	0	0.000234997	-0.234478	0.0128305	-0.350662	0.000932649	na	na	-0.165956	0.201168
Innate Immune System	TLR7	0.00424842	0	0	1	0.000219945	-0.258917	0.0058415	-0.352179	0.00088291	-0.230032	0.213166	-0.13707	0.292164
Innate Immune System	MEF2C	0.00416096	0	0	0	0.000211638	-0.192515	0.0419928	-0.428434	3.86702e-05	-0.193275	0.297527	-0.0621674	0.634103
Innate Immune System	LAT2	0.00399878	0	0	0	0.000199758	-0.283184	0.00248217	-0.25791	0.0165086	-0.365344	0.0432766	-0.181763	0.160929
Innate Immune System	HCK	0.0036947	0	0	1	0.000181211	-0.241277	0.0103842	-0.307505	0.00397564	-0.346158	0.0564463	-0.207445	0.108673
Innate Immune System	UBA7	0.00345911	0	0	0	0.000166515	-0.211379	0.0252689	-0.394132	0.000173525	na	na	-0.117371	0.367665
Innate Immune System	CD36	0.00333285	0	0	1	0.00015741	-0.248323	0.00829034	-0.387344	0.0002292	-0.133091	0.47538	-0.154015	0.235978
Innate Immune System	CECR1	0.00295654	0	0	0	0.000136952	-0.223649	0.0177671	-0.406514	0.000102828	-0.143795	0.440269	-0.158119	0.223575
Innate Immune System	CD209	0.00284224	0	0	0	0.000129075	-0.25024	0.00778952	-0.382234	0.000281503	-0.147228	0.429313	-0.174853	0.177723
Innate Immune System	CYBB	0.00282813	0	0	0	0.000118131	-0.247065	0.00863425	-0.349667	0.000966662	-0.338888	0.0621922	-0.137865	0.289349
Innate Immune System	CLEC12A	0.00282813	0	0	0	0.000118416	-0.212087	0.024772	-0.355346	0.000786775	-0.294861	0.107336	-0.231994	0.0720067
Innate Immune System	VAV1	0.00282813	0	0	1	0.00012309	-0.227008	0.0160848	-0.366372	0.000521745	-0.264567	0.150353	-0.198496	0.125144
Innate Immune System	LRMP	0.00282813	0	0	0	0.000123561	-0.200661	0.0338882	-0.443936	1.85711e-05	-0.0553368	0.767484	-0.127247	0.328444
Innate Immune System	ATP8B4	0.00282813	0	0	0	0.000125866	-0.200195	0.0343137	-0.409653	8.97616e-05	-0.269616	0.142434	-0.116842	0.369846
Innate Immune System	PLD4	0.00251257	0	0	0	0.000100411	-0.316479	0.000674969	-0.127822	0.240858	-0.385742	0.0320977	-0.289523	0.0236246
Innate Immune System	C3	0.00168149	0	0	1	6.50194e-05	-0.302104	0.00120668	-0.268832	0.0123207	na	na	-0.268226	0.036614
Innate Immune System	CCR2	0.00168149	0	0	1	6.56711e-05	-0.228159	0.015541	-0.370515	0.000445422	-0.0916895	0.623736	-0.304377	0.0170806
Innate Immune System	TLR1	0.00136953	0	0	0	5.01333e-05	-0.270131	0.00397076	-0.361091	0.00063634	-0.2577	0.161627	-0.195796	0.130469
Innate Immune System	CD86	0.00136953	0	0	1	5.09998e-05	-0.261385	0.00537296	-0.326505	0.00215406	-0.392407	0.029001	-0.181286	0.162048
Innate Immune System	PLCG2	0.00131792	0	0	1	4.66838e-05	-0.256919	0.00624695	-0.401708	0.000126297	-0.0838131	0.653962	-0.215839	0.0947939
Innate Immune System	CD14	0.00126667	0	0	1	4.18995e-05	-0.323766	0.000497199	-0.215872	0.0459099	-0.350601	0.0531464	-0.269904	0.0354115
Innate Immune System	CD33	0.00126667	0	0	1	4.36263e-05	-0.237986	0.0115117	-0.394151	0.000173389	-0.358817	0.047448	-0.0929599	0.476115
Innate Immune System	TYROBP	0.00126667	0	0	0	4.37179e-05	-0.315179	0.000712252	-0.214611	0.0472247	-0.360295	0.0464762	-0.279886	0.0289166
Innate Immune System	NLRC3	0.00121808	0	0	0	3.87217e-05	-0.227628	0.0157896	-0.397138	0.000153116	na	na	-0.198893	0.124375
Innate Immune System	ELMO1	0.000998892	0	0	0	3.08468e-05	-0.253068	0.00709939	-0.379968	0.000308038	-0.2577	0.161627	-0.222881	0.0842506
Innate Immune System	ITGB2	0.000829838	0	0	1	2.48725e-05	-0.300832	0.00126862	-0.296508	0.00556958	-0.345956	0.0566	-0.24446	0.0576023
Innate Immune System	WIPF1	0.000696071	0	0	0	2.02309e-05	-0.248024	0.00837111	-0.416498	6.64202e-05	na	na	-0.146999	0.258265
Innate Immune System	RNASE6	0.000632945	0	0	0	1.78213e-05	-0.273083	0.00357745	-0.420821	5.47306e-05	-0.190852	0.303742	-0.146284	0.260613
Innate Immune System	LY86	0.000573359	0	0	0	1.43895e-05	-0.315833	0.000693258	-0.319792	0.00268675	-0.312261	0.0872272	-0.230401	0.0740379
Innate Immune System	PRKCQ	0.000573359	0	0	1	1.47931e-05	-0.266763	0.00446629	-0.362428	0.00060534	-0.336262	0.0643762	-0.232466	0.0714129
Innate Immune System	RASGRP2	0.000573359	0	0	0	1.55778e-05	-0.215662	0.0223899	-0.461362	7.79366e-06	0.0563523	0.763337	-0.213075	0.0992027
Innate Immune System	C1QB	0.000573359	0	0	1	1.55968e-05	-0.331001	0.00036425	-0.2318	0.0317529	-0.36797	0.0416839	-0.282401	0.0274478
Innate Immune System	CD19	0.000573359	0	0	1	1.56229e-05	-0.182697	0.0538484	-0.473696	4.09321e-06	0.0537212	0.774095	-0.227606	0.0777116
Innate Immune System	CD53	0.000470208	0	0	0	1.03004e-05	-0.275158	0.0033223	-0.390368	0.000202625	-0.221269	0.231602	-0.25002	0.0519791
Innate Immune System	C3AR1	0.000470208	0	0	1	1.06769e-05	-0.30014	0.00130347	-0.345761	0.00111129	-0.292841	0.109878	-0.248855	0.0531186
Innate Immune System	ITK	0.000446501	0	0	1	9.32745e-06	-0.212966	0.0241671	-0.472388	4.38781e-06	-0.132889	0.476056	-0.189838	0.142819
Innate Immune System	CD300A	0.000421598	0	0	0	7.60859e-06	-0.306331	0.00102027	-0.263438	0.0142568	-0.413411	0.0207951	-0.300167	0.0187552
Innate Immune System	C1QC	0.000421598	0	0	0	7.95472e-06	-0.348949	0.000162764	-0.212032	0.0500104	-0.350399	0.053293	-0.313829	0.01378
Innate Immune System	ITGAL	0.000421598	0	0	1	8.19408e-06	-0.260996	0.00544455	-0.428463	3.86195e-05	-0.200465	0.279565	-0.209405	0.105301
Innate Immune System	HVCN1	0.000421598	0	0	1	8.32987e-06	-0.264483	0.00483256	-0.393886	0.000175306	-0.318692	0.080573	-0.217348	0.0924521
Innate Immune System	GMFG	0.000421598	0	0	0	8.42429e-06	-0.252465	0.00724189	-0.421286	5.35955e-05	-0.193275	0.297527	-0.246605	0.0553776
Innate Immune System	IRF1	0.000421169	0	0	1	6.50306e-06	-0.281837	0.00260824	-0.390795	0.000199114	-0.32034	0.0789325	-0.203845	0.115087
Innate Immune System	NCKAP1L	0.000365242	0	0	0	5.30779e-06	-0.272124	0.00370112	-0.430738	3.47544e-05	-0.155105	0.404756	-0.232466	0.0714129
Innate Immune System	CD247	0.000225379	0	0	1	3.07057e-06	-0.250569	0.00770618	-0.483139	2.45751e-06	-0.0605878	0.74611	-0.191718	0.138831
Innate Immune System	CD3G	0.00016288	0	0	1	1.69657e-06	-0.285846	0.00224926	-0.43236	3.2224e-05	-0.11855	0.525311	-0.285261	0.0258546
Innate Immune System	GLIPR1	0.00016288	0	0	0	1.93455e-06	-0.283035	0.0024959	-0.448572	1.48087e-05	-0.282339	0.123829	-0.149408	0.250457
Innate Immune System	WAS	0.00016288	0	0	0	2.04646e-06	-0.288638	0.00202627	-0.435213	2.81827e-05	-0.180469	0.331287	-0.238056	0.0646794
Innate Immune System	CYFIP2	0.00016288	0	0	0	2.0475e-06	-0.294882	0.0015983	-0.453407	1.1653e-05	0.0167626	0.928684	-0.232969	0.0707849
Innate Immune System	IL2RB	0.00016288	0	0	1	2.07114e-06	-0.268676	0.00417846	-0.451179	1.30194e-05	-0.260326	0.157247	-0.188806	0.145046
Innate Immune System	GZMM	0.00014066	0	0	0	1.14981e-06	-0.327471	0.000424368	-0.348937	0.000992317	-0.146738	0.430868	-0.368689	0.00345856
Innate Immune System	CD4	0.000134429	0	0	1	5.94376e-07	-0.313716	0.000756445	-0.441091	2.13036e-05	-0.15773	0.396751	-0.256639	0.0458767
Innate Immune System	ARHGAP9	0.000134429	0	0	0	7.73772e-07	-0.250638	0.00768897	-0.470862	4.75668e-06	-0.336666	0.0640364	-0.178109	0.169657
Innate Immune System	C1QA	0.000134429	0	0	1	9.33439e-07	-0.318687	0.000615758	-0.362656	0.000600203	-0.406746	0.0231598	-0.244433	0.0576302
Innate Immune System	BTK	0.000134429	0	0	1	9.56104e-07	-0.259905	0.00564973	-0.497579	1.09309e-06	-0.139352	0.454669	-0.173714	0.180608
Innate Immune System	DOCK2	0.000134429	0	0	0	9.76775e-07	-0.262712	0.00513531	-0.463978	6.8126e-06	-0.256084	0.164365	-0.218698	0.0903954
Innate Immune System	FGL2	8.57065e-05	0	0	0	2.33533e-07	-0.31544	0.000704623	-0.44057	2.18436e-05	-0.342523	0.0592646	-0.206545	0.11025
Innate Immune System	TBC1D10C	2.53878e-05	0	0	0	4.10622e-08	-0.291788	0.00179884	-0.488743	1.80247e-06	-0.14945	0.422305	-0.326617	0.0101973
Innate Immune System	RASAL3	2.53878e-05	0	0	0	4.61178e-08	-0.287185	0.00213968	-0.488942	1.78254e-06	na	na	-0.259234	0.0436509
Interferon alpha/beta signaling	STAT2	0.0467448	0	0	1	0.00996201	-0.220256	0.0196188	-0.25755	0.0166655	-0.253863	0.168184	-0.0356377	0.785109
Interferon alpha/beta signaling	IFITM1	0.0383445	0	0	0	0.00754317	-0.196797	0.0375505	-0.243755	0.0237194	-0.328992	0.0707378	-0.0942573	0.469954
Interferon alpha/beta signaling	BST2	0.0377313	0	0	0	0.00631614	-0.261017	0.0054406	-0.137464	0.206899	-0.318894	0.0803705	-0.147131	0.257832
Interferon alpha/beta signaling	IRF8	0.0377313	0	0	0	0.00639846	-0.1961	0.0382458	-0.22321	0.038846	0.111683	0.54974	-0.279648	0.0290592
Interferon alpha/beta signaling	STAT1	0.0377313	0	0	1	0.006804	-0.221446	0.0189516	-0.152406	0.161252	-0.420479	0.0185084	-0.0973021	0.455665
Interferon alpha/beta signaling	HLA-E	0.0251644	0	0	0	0.00310031	-0.216748	0.0217061	-0.0683671	0.531666	-0.51439	0.0030717	-0.147449	0.256794
Interferon alpha/beta signaling	HLA-G	0.0251644	0	0	0	0.00327354	-0.22296	0.0181303	-0.158702	0.144436	-0.411997	0.0212793	-0.175779	0.1754
Interferon alpha/beta signaling	OAS2	0.0251644	0	0	0	0.00330025	-0.196699	0.037648	-0.22868	0.034191	-0.469555	0.00769788	0.000503059	0.99693
Interferon alpha/beta signaling	SAMHD1	0.0147312	1	0	0	0.00102396	-0.228304	0.0154734	-0.330762	0.00186757	-0.0874484	0.639941	-0.202071	0.118351
Interferon alpha/beta signaling	XAF1	0.0147312	0	0	0	0.00120748	-0.276921	0.00311852	-0.283509	0.00816454	na	na	-0.0585931	0.65376
Interferon alpha/beta signaling	IFIT3	0.0108213	0	0	0	0.000532196	-0.27704	0.00310509	-0.268491	0.012436	-0.305564	0.0945935	-0.145596	0.262887
Interferon alpha/beta signaling	GBP2	0.00298245	0	0	0	9.77854e-05	-0.258386	0.00594681	-0.342556	0.00124433	-0.370191	0.0403732	-0.109799	0.399582
Interferon alpha/beta signaling	IRF1	0.000396687	0	0	1	6.50306e-06	-0.281837	0.00260824	-0.390795	0.000199114	-0.32034	0.0789325	-0.203845	0.115087
Interferon gamma signaling	PTPN6	0.0497839	0	0	1	0.0165504	-0.187205	0.0481008	-0.139066	0.201605	-0.335656	0.0648886	-0.192009	0.138221
Interferon gamma signaling	IRF4	0.0497839	0	0	0	0.0167946	-0.149644	0.115302	-0.313582	0.00328183	0.0319096	0.86469	-0.14308	0.271312
Interferon gamma signaling	IFI30	0.0497839	0	0	0	0.0173551	-0.17013	0.0729118	-0.230482	0.0327645	-0.256084	0.164365	-0.153777	0.236713
Interferon gamma signaling	ICAM1	0.0497839	0	0	1	0.0173665	-0.190572	0.0441476	-0.132126	0.22525	-0.416642	0.0197224	-0.0933306	0.47435
Interferon gamma signaling	PTAFR	0.0450054	0	0	1	0.0136063	-0.177771	0.0607631	-0.295028	0.0058226	-0.0349531	0.85192	-0.159405	0.219783
Interferon gamma signaling	TRIM5	0.0367822	0	0	0	0.00990967	-0.0582259	0.541988	-0.355109	0.000793626	-0.195497	0.291901	0.123911	0.341386
Interferon gamma signaling	HLA-DRA	0.0367822	0	0	1	0.0103717	-0.21567	0.0223847	-0.244627	0.0232081	-0.166414	0.370925	-0.153777	0.236713
Interferon gamma signaling	CD44	0.0367822	0	0	1	0.0106925	-0.0714079	0.454347	-0.296517	0.00556823	-0.190852	0.303742	0.240515	0.0618834
Interferon gamma signaling	B2M	0.0343098	0	0	1	0.00877691	-0.274208	0.00343699	-0.162115	0.13589	-0.251566	0.172199	-0.0981229	0.451854
Interferon gamma signaling	GBP5	0.0305331	0	0	0	0.00745575	-0.190718	0.0439831	-0.214506	0.0473348	-0.305362	0.0948228	-0.187614	0.147647
Interferon gamma signaling	STAT1	0.0292572	0	0	1	0.006804	-0.221446	0.0189516	-0.152406	0.161252	-0.420479	0.0185084	-0.0973021	0.455665
Interferon gamma signaling	IRF8	0.0289614	0	0	0	0.00639846	-0.1961	0.0382458	-0.22321	0.038846	0.111683	0.54974	-0.279648	0.0290592
Interferon gamma signaling	HLA-DPA1	0.0247352	0	0	0	0.00517713	-0.219503	0.0200516	-0.270197	0.0118686	-0.119964	0.520347	-0.189071	0.144472
Interferon gamma signaling	CIITA	0.0179705	0	0	0	0.00355231	-0.195043	0.0393199	-0.337275	0.00149533	-0.168872	0.3638	-0.0862613	0.508601
Interferon gamma signaling	HLA-E	0.0177389	0	0	0	0.00310031	-0.216748	0.0217061	-0.0683671	0.531666	-0.51439	0.0030717	-0.147449	0.256794
Interferon gamma signaling	HLA-G	0.0177389	0	0	0	0.00327354	-0.22296	0.0181303	-0.158702	0.144436	-0.411997	0.0212793	-0.175779	0.1754
Interferon gamma signaling	OAS2	0.0177389	0	0	0	0.00330025	-0.196699	0.037648	-0.22868	0.034191	-0.469555	0.00769788	0.000503059	0.99693
Interferon gamma signaling	VCAM1	0.0133798	0	0	1	0.00202253	-0.178836	0.0592097	-0.369596	0.00046142	-0.0441326	0.813637	-0.15428	0.235164
Interferon gamma signaling	FCGR1B	0.0112013	0	0	0	0.00156297	-0.245572	0.00905877	-0.212714	0.0492602	na	na	-0.251185	0.0508595
Interferon gamma signaling	GBP1	0.00511933	0	0	0	0.000654798	-0.243827	0.00957827	-0.313317	0.00330971	-0.260527	0.156914	-0.149461	0.250287
Interferon gamma signaling	FCGR1A	0.00374213	0	0	1	0.000435132	-0.261394	0.00537139	-0.223911	0.038221	-0.363527	0.0444075	-0.224523	0.0819314
Interferon gamma signaling	HLA-DQB2	0.00323031	0	0	0	0.000338056	-0.283557	0.00244834	-0.299987	0.00501308	-0.126225	0.498646	-0.219492	0.0892024
Interferon gamma signaling	PML	0.00310305	0	0	1	0.000288656	-0.257308	0.00616604	-0.285405	0.00772976	-0.378674	0.0356699	-0.145225	0.264118
Interferon gamma signaling	HLA-DQA1	0.00182634	0	0	1	0.000148656	-0.248918	0.00813199	-0.313971	0.00324138	-0.319298	0.0799668	-0.216156	0.0942971
Interferon gamma signaling	HLA-DQA2	0.00140159	0	0	0	9.5639e-05	-0.321413	0.000549246	-0.173843	0.109427	na	na	-0.31277	0.0141202
Interferon gamma signaling	GBP2	0.00140159	0	0	0	9.77854e-05	-0.258386	0.00594681	-0.342556	0.00124433	-0.370191	0.0403732	-0.109799	0.399582
Interferon gamma signaling	GBP4	0.00100252	0	0	0	4.66288e-05	-0.256957	0.00623891	-0.393801	0.000175926	-0.173483	0.350653	-0.197596	0.1269
Interferon gamma signaling	HLA-DPB1	0.000296161	0	0	0	1.03312e-05	-0.246881	0.00868559	-0.438617	2.3982e-05	-0.196506	0.289366	-0.193598	0.134927
Interferon gamma signaling	IRF1	0.000279632	0	0	1	6.50306e-06	-0.281837	0.00260824	-0.390795	0.000199114	-0.32034	0.0789325	-0.203845	0.115087
Interferon gamma signaling	TRIM22	4.91791e-06	0	0	0	5.7185e-08	-0.30856	0.000932919	-0.452317	1.23039e-05	-0.469757	0.00766812	-0.155736	0.23072
Interferon Signaling	GBP5	0.0487612	0	0	0	0.00745575	-0.190718	0.0439831	-0.214506	0.0473348	-0.305362	0.0948228	-0.187614	0.147647
Interferon Signaling	IFITM1	0.0487612	0	0	0	0.00754317	-0.196797	0.0375505	-0.243755	0.0237194	-0.328992	0.0707378	-0.0942573	0.469954
Interferon Signaling	STAT1	0.0473663	0	0	1	0.006804	-0.221446	0.0189516	-0.152406	0.161252	-0.420479	0.0185084	-0.0973021	0.455665
Interferon Signaling	BST2	0.0463248	0	0	0	0.00631614	-0.261017	0.0054406	-0.137464	0.206899	-0.318894	0.0803705	-0.147131	0.257832
Interferon Signaling	IRF8	0.0463248	0	0	0	0.00639846	-0.1961	0.0382458	-0.22321	0.038846	0.111683	0.54974	-0.279648	0.0290592
Interferon Signaling	HLA-DPA1	0.0407417	0	0	0	0.00517713	-0.219503	0.0200516	-0.270197	0.0118686	-0.119964	0.520347	-0.189071	0.144472
Interferon Signaling	CIITA	0.0305656	0	0	0	0.00355231	-0.195043	0.0393199	-0.337275	0.00149533	-0.168872	0.3638	-0.0862613	0.508601
Interferon Signaling	UBE2L6	0.0305656	0	0	0	0.00371515	-0.23746	0.0117016	-0.152027	0.162309	-0.441685	0.0128622	-0.0937542	0.472338
Interferon Signaling	HLA-E	0.0298673	0	0	0	0.00310031	-0.216748	0.0217061	-0.0683671	0.531666	-0.51439	0.0030717	-0.147449	0.256794
Interferon Signaling	HLA-G	0.0298673	0	0	0	0.00327354	-0.22296	0.0181303	-0.158702	0.144436	-0.411997	0.0212793	-0.175779	0.1754
Interferon Signaling	OAS2	0.0298673	0	0	0	0.00330025	-0.196699	0.037648	-0.22868	0.034191	-0.469555	0.00769788	0.000503059	0.99693
Interferon Signaling	VCAM1	0.021534	0	0	1	0.00202253	-0.178836	0.0592097	-0.369596	0.00046142	-0.0441326	0.813637	-0.15428	0.235164
Interferon Signaling	FCGR1B	0.0176811	0	0	0	0.00156297	-0.245572	0.00905877	-0.212714	0.0492602	na	na	-0.251185	0.0508595
Interferon Signaling	XAF1	0.0145702	0	0	0	0.00120748	-0.276921	0.00311852	-0.283509	0.00816454	na	na	-0.0585931	0.65376
Interferon Signaling	SAMHD1	0.0132383	1	0	0	0.00102396	-0.228304	0.0154734	-0.330762	0.00186757	-0.0874484	0.639941	-0.202071	0.118351
Interferon Signaling	GBP1	0.0091168	0	0	0	0.000654798	-0.243827	0.00957827	-0.313317	0.00330971	-0.260527	0.156914	-0.149461	0.250287
Interferon Signaling	IFIT3	0.00802729	0	0	0	0.000532196	-0.27704	0.00310509	-0.268491	0.012436	-0.305564	0.0945935	-0.145596	0.262887
Interferon Signaling	FCGR1A	0.00715989	0	0	1	0.000435132	-0.261394	0.00537139	-0.223911	0.038221	-0.363527	0.0444075	-0.224523	0.0819314
Interferon Signaling	HLA-DQB2	0.00611882	0	0	0	0.000338056	-0.283557	0.00244834	-0.299987	0.00501308	-0.126225	0.498646	-0.219492	0.0892024
Interferon Signaling	PML	0.00580519	0	0	1	0.000288656	-0.257308	0.00616604	-0.285405	0.00772976	-0.378674	0.0356699	-0.145225	0.264118
Interferon Signaling	HLA-DQA1	0.0037674	0	0	1	0.000148656	-0.248918	0.00813199	-0.313971	0.00324138	-0.319298	0.0799668	-0.216156	0.0942971
Interferon Signaling	UBA7	0.0037674	0	0	0	0.000166515	-0.211379	0.0252689	-0.394132	0.000173525	na	na	-0.117371	0.367665
Interferon Signaling	HLA-DQA2	0.00294986	0	0	0	9.5639e-05	-0.321413	0.000549246	-0.173843	0.109427	na	na	-0.31277	0.0141202
Interferon Signaling	GBP2	0.00294986	0	0	0	9.77854e-05	-0.258386	0.00594681	-0.342556	0.00124433	-0.370191	0.0403732	-0.109799	0.399582
Interferon Signaling	GBP4	0.00210995	0	0	0	4.66288e-05	-0.256957	0.00623891	-0.393801	0.000175926	-0.173483	0.350653	-0.197596	0.1269
Interferon Signaling	HLA-DPB1	0.000623315	0	0	0	1.03312e-05	-0.246881	0.00868559	-0.438617	2.3982e-05	-0.196506	0.289366	-0.193598	0.134927
Interferon Signaling	IRF1	0.000588527	0	0	1	6.50306e-06	-0.281837	0.00260824	-0.390795	0.000199114	-0.32034	0.0789325	-0.203845	0.115087
Interferon Signaling	TRIM22	1.03505e-05	0	0	0	5.7185e-08	-0.30856	0.000932919	-0.452317	1.23039e-05	-0.469757	0.00766812	-0.155736	0.23072
Interleukin-12 signaling	IL12B	0.0494777	0	0	1	0.0247389	-0.236173	0.0121776	-0.123367	0.257783	-0.00859194	0.963412	-0.25132	0.0507315
Interleukin-12 signaling	IL12RB1	0.00439298	0	0	0	0.00109825	-0.238123	0.0114627	-0.303931	0.00444223	-0.175907	0.343859	-0.192777	0.136621
Neutrophil degranulation	STK10	0.0469875	0	0	1	0.0047838	-0.216983	0.0215604	-0.304376	0.00438152	-0.162493	0.382463	-0.0994203	0.445866
Neutrophil degranulation	CHI3L1	0.0388868	0	0	1	0.00387108	-0.163768	0.0844593	-0.177863	0.101341	-0.498234	0.00433794	-0.127353	0.328038
Neutrophil degranulation	DEFA4	0.0388421	0	0	1	0.00377876	0.320622	0.000567825	-0.0467459	0.669093	-0.361352	0.0457918	-0.0542064	0.678206
Neutrophil degranulation	MAPK14	0.0342433	0	0	1	0.00325389	0.216166	0.0220701	0.327538	0.0020811	0.154095	0.407859	0.0844344	0.517653
Neutrophil degranulation	FCER1G	0.0313083	0	0	1	0.00290416	-0.237944	0.011527	-0.185096	0.0879759	-0.382309	0.0337947	-0.151474	0.243893
Neutrophil degranulation	CFP	0.0309645	0	0	0	0.00280222	-0.22222	0.0185277	-0.155677	0.152342	-0.0480663	0.797354	-0.367789	0.00354491
Neutrophil degranulation	AP1M1	0.0260689	0	0	0	0.00224784	-0.239	0.0111533	-0.323708	0.00236323	-0.0252449	0.892768	-0.148111	0.254641
Neutrophil degranulation	TNFRSF1B	0.0260689	0	0	1	0.0023002	-0.200879	0.0336907	-0.316398	0.00299876	0.0450369	0.809887	-0.229315	0.0754482
Neutrophil degranulation	SIGLEC5	0.019575	0	0	0	0.00163863	-0.281644	0.00262672	-0.076132	0.485991	-0.268202	0.14462	-0.293707	0.0215965
Neutrophil degranulation	SIGLEC9	0.01924	0	0	0	0.00156706	-0.268826	0.00415664	-0.0824653	0.45034	-0.387964	0.031037	-0.237947	0.0648057
Neutrophil degranulation	LTF	0.0135496	0	0	1	0.00107293	-0.221489	0.0189279	-0.272956	0.0109989	na	na	-0.234081	0.0694123
Neutrophil degranulation	ITGAX	0.0135264	0	0	1	0.0010405	-0.229513	0.0149214	-0.266852	0.013003	-0.38857	0.0307527	-0.115756	0.374339
Neutrophil degranulation	FGR	0.0128538	0	0	1	0.000959673	-0.186088	0.0494749	-0.273535	0.0108238	-0.430779	0.0155525	-0.152056	0.242064
Neutrophil degranulation	C16ORF62	0.011191	0	0	0	0.000810207	-0.21164	0.0250845	-0.359498	0.000675167	na	na	-0.066537	0.610412
Neutrophil degranulation	SELL	0.00959534	0	0	1	0.000672327	-0.191599	0.0429973	-0.373758	0.000392984	-0.163789	0.378626	-0.165956	0.201168
Neutrophil degranulation	CD68	0.00959534	0	0	0	0.000672976	-0.283082	0.00249158	-0.179787	0.0976395	-0.171801	0.355416	-0.310414	0.0149031
Neutrophil degranulation	TRPM2	0.00655168	0	0	1	0.000429861	0.240708	0.010572	0.331075	0.00184794	0.328386	0.0712892	0.0823163	0.528249
Neutrophil degranulation	MNDA	0.00568567	0	0	0	0.000360178	-0.236994	0.0118722	-0.310548	0.00361335	-0.338282	0.062691	-0.15947	0.219596
Neutrophil degranulation	LILRB2	0.00466452	0	0	0	0.000284937	-0.257946	0.00603556	-0.272312	0.011197	-0.212259	0.251644	-0.285022	0.0259843
Neutrophil degranulation	LAIR1	0.00446019	0	0	0	0.000262364	-0.323809	0.000496296	-0.0939372	0.389627	-0.316066	0.0832407	-0.287246	0.0247947
Neutrophil degranulation	PTPRC	0.00415475	0	0	1	0.000231876	-0.216414	0.0219142	-0.383106	0.000271863	-0.244169	0.185587	-0.132146	0.310011
Neutrophil degranulation	PLEKHO2	0.00415475	0	0	0	0.000234997	-0.234478	0.0128305	-0.350662	0.000932649	na	na	-0.165956	0.201168
Neutrophil degranulation	CD36	0.00302501	0	0	1	0.00015741	-0.248323	0.00829034	-0.387344	0.0002292	-0.133091	0.47538	-0.154015	0.235978
Neutrophil degranulation	CECR1	0.00275148	0	0	0	0.000136952	-0.223649	0.0177671	-0.406514	0.000102828	-0.143795	0.440269	-0.158119	0.223575
Neutrophil degranulation	CYBB	0.00264918	0	0	0	0.000118131	-0.247065	0.00863425	-0.349667	0.000966662	-0.338888	0.0621922	-0.137865	0.289349
Neutrophil degranulation	CLEC12A	0.00264918	0	0	0	0.000118416	-0.212087	0.024772	-0.355346	0.000786775	-0.294861	0.107336	-0.231994	0.0720067
Neutrophil degranulation	LRMP	0.00264918	0	0	0	0.000123561	-0.200661	0.0338882	-0.443936	1.85711e-05	-0.0553368	0.767484	-0.127247	0.328444
Neutrophil degranulation	ATP8B4	0.00264918	0	0	0	0.000125866	-0.200195	0.0343137	-0.409653	8.97616e-05	-0.269616	0.142434	-0.116842	0.369846
Neutrophil degranulation	C3	0.0016905	0	0	1	6.50194e-05	-0.302104	0.00120668	-0.268832	0.0123207	na	na	-0.268226	0.036614
Neutrophil degranulation	CD14	0.00120771	0	0	1	4.18995e-05	-0.323766	0.000497199	-0.215872	0.0459099	-0.350601	0.0531464	-0.269904	0.0354115
Neutrophil degranulation	CD33	0.00120771	0	0	1	4.36263e-05	-0.237986	0.0115117	-0.394151	0.000173389	-0.358817	0.047448	-0.0929599	0.476115
Neutrophil degranulation	TYROBP	0.00120771	0	0	0	4.37179e-05	-0.315179	0.000712252	-0.214611	0.0472247	-0.360295	0.0464762	-0.279886	0.0289166
Neutrophil degranulation	ITGB2	0.000845666	0	0	1	2.48725e-05	-0.300832	0.00126862	-0.296508	0.00556958	-0.345956	0.0566	-0.24446	0.0576023
Neutrophil degranulation	CD53	0.000393264	0	0	0	1.03004e-05	-0.275158	0.0033223	-0.390368	0.000202625	-0.221269	0.231602	-0.25002	0.0519791
Neutrophil degranulation	C3AR1	0.000393264	0	0	1	1.06769e-05	-0.30014	0.00130347	-0.345761	0.00111129	-0.292841	0.109878	-0.248855	0.0531186
Neutrophil degranulation	NCKAP1L	0.000372354	0	0	0	5.30779e-06	-0.272124	0.00370112	-0.430738	3.47544e-05	-0.155105	0.404756	-0.232466	0.0714129
Neutrophil degranulation	CD300A	0.000372354	0	0	0	7.60859e-06	-0.306331	0.00102027	-0.263438	0.0142568	-0.413411	0.0207951	-0.300167	0.0187552
Neutrophil degranulation	ITGAL	0.000372354	0	0	1	8.19408e-06	-0.260996	0.00544455	-0.428463	3.86195e-05	-0.200465	0.279565	-0.209405	0.105301
Neutrophil degranulation	HVCN1	0.000372354	0	0	1	8.32987e-06	-0.264483	0.00483256	-0.393886	0.000175306	-0.318692	0.080573	-0.217348	0.0924521
Neutrophil degranulation	GMFG	0.000372354	0	0	0	8.42429e-06	-0.252465	0.00724189	-0.421286	5.35955e-05	-0.193275	0.297527	-0.246605	0.0553776
Neutrophil degranulation	GLIPR1	0.000171015	0	0	0	1.93455e-06	-0.283035	0.0024959	-0.448572	1.48087e-05	-0.282339	0.123829	-0.149408	0.250457
Neutrophil degranulation	ARHGAP9	0.000107934	0	0	0	7.73772e-07	-0.250638	0.00768897	-0.470862	4.75668e-06	-0.336666	0.0640364	-0.178109	0.169657
Neutrophil degranulation	DOCK2	0.000107934	0	0	0	9.76775e-07	-0.262712	0.00513531	-0.463978	6.8126e-06	-0.256084	0.164365	-0.218698	0.0903954
Neutrophil degranulation	FGL2	5.16107e-05	0	0	0	2.33533e-07	-0.31544	0.000704623	-0.44057	2.18436e-05	-0.342523	0.0592646	-0.206545	0.11025
Neutrophil degranulation	TBC1D10C	1.81495e-05	0	0	0	4.10622e-08	-0.291788	0.00179884	-0.488743	1.80247e-06	-0.14945	0.422305	-0.326617	0.0101973
PD-1 signaling	HLA-DQB1	0.0368677	0	0	0	0.0258074	-0.149144	0.116538	-0.229733	0.0333514	-0.296274	0.105583	-0.110355	0.397184
PD-1 signaling	PTPN6	0.0254621	0	0	1	0.0165504	-0.187205	0.0481008	-0.139066	0.201605	-0.335656	0.0648886	-0.192009	0.138221
PD-1 signaling	HLA-DRA	0.0172862	0	0	1	0.0103717	-0.21567	0.0223847	-0.244627	0.0232081	-0.166414	0.370925	-0.153777	0.236713
PD-1 signaling	PDCD1LG2	0.0157564	0	0	1	0.00866605	-0.222162	0.0185592	-0.261816	0.0148879	0.0464506	0.804032	-0.181826	0.160782
PD-1 signaling	HLA-DPA1	0.0103543	0	0	0	0.00517713	-0.219503	0.0200516	-0.270197	0.0118686	-0.119964	0.520347	-0.189071	0.144472
PD-1 signaling	HLA-DQB2	0.000751236	0	0	0	0.000338056	-0.283557	0.00244834	-0.299987	0.00501308	-0.126225	0.498646	-0.219492	0.0892024
PD-1 signaling	HLA-DQA1	0.000371639	0	0	1	0.000148656	-0.248918	0.00813199	-0.313971	0.00324138	-0.319298	0.0799668	-0.216156	0.0942971
PD-1 signaling	HLA-DQA2	0.000273254	0	0	0	9.5639e-05	-0.321413	0.000549246	-0.173843	0.109427	na	na	-0.31277	0.0141202
PD-1 signaling	HLA-DPB1	3.44373e-05	0	0	0	1.03312e-05	-0.246881	0.00868559	-0.438617	2.3982e-05	-0.196506	0.289366	-0.193598	0.134927
PD-1 signaling	CD3E	2.06898e-05	0	0	1	5.17245e-06	-0.279809	0.00280885	-0.417617	6.31909e-05	-0.20822	0.26099	-0.227488	0.0778698
PD-1 signaling	CD3G	1.53528e-05	0	0	1	1.69657e-06	-0.285846	0.00224926	-0.43236	3.2224e-05	-0.11855	0.525311	-0.285261	0.0258546
PD-1 signaling	CD3D	1.53528e-05	0	0	1	2.92435e-06	-0.24858	0.00822166	-0.485586	2.14791e-06	-0.0931126	0.618336	-0.178083	0.169721
PD-1 signaling	CD247	1.53528e-05	0	0	1	3.07057e-06	-0.250569	0.00770618	-0.483139	2.45751e-06	-0.0605878	0.74611	-0.191718	0.138831
PD-1 signaling	CD4	1.18875e-05	0	0	1	5.94376e-07	-0.313716	0.000756445	-0.441091	2.13036e-05	-0.15773	0.396751	-0.256639	0.0458767
Phosphorylation of CD3 and TCR zeta chains	HLA-DQB1	0.0350243	0	0	0	0.0258074	-0.149144	0.116538	-0.229733	0.0333514	-0.296274	0.105583	-0.110355	0.397184
Phosphorylation of CD3 and TCR zeta chains	HLA-DRA	0.0151587	0	0	1	0.0103717	-0.21567	0.0223847	-0.244627	0.0232081	-0.166414	0.370925	-0.153777	0.236713
Phosphorylation of CD3 and TCR zeta chains	HLA-DPA1	0.00819712	0	0	0	0.00517713	-0.219503	0.0200516	-0.270197	0.0118686	-0.119964	0.520347	-0.189071	0.144472
Phosphorylation of CD3 and TCR zeta chains	PTPN22	0.00133626	0	0	0	0.000773626	-0.211374	0.0252719	-0.377067	0.000345366	-0.108048	0.562884	-0.131457	0.312561
Phosphorylation of CD3 and TCR zeta chains	HLA-DQB2	0.000642307	0	0	0	0.000338056	-0.283557	0.00244834	-0.299987	0.00501308	-0.126225	0.498646	-0.219492	0.0892024
Phosphorylation of CD3 and TCR zeta chains	PTPRC	0.000489517	0	0	1	0.000231876	-0.216414	0.0219142	-0.383106	0.000271863	-0.244169	0.185587	-0.132146	0.310011
Phosphorylation of CD3 and TCR zeta chains	HLA-DQA1	0.000353057	0	0	1	0.000148656	-0.248918	0.00813199	-0.313971	0.00324138	-0.319298	0.0799668	-0.216156	0.0942971
Phosphorylation of CD3 and TCR zeta chains	HLA-DQA2	0.000259592	0	0	0	9.5639e-05	-0.321413	0.000549246	-0.173843	0.109427	na	na	-0.31277	0.0141202
Phosphorylation of CD3 and TCR zeta chains	HLA-DPB1	3.27154e-05	0	0	0	1.03312e-05	-0.246881	0.00868559	-0.438617	2.3982e-05	-0.196506	0.289366	-0.193598	0.134927
Phosphorylation of CD3 and TCR zeta chains	CD3E	1.96553e-05	0	0	1	5.17245e-06	-0.279809	0.00280885	-0.417617	6.31909e-05	-0.20822	0.26099	-0.227488	0.0778698
Phosphorylation of CD3 and TCR zeta chains	CD3G	1.45852e-05	0	0	1	1.69657e-06	-0.285846	0.00224926	-0.43236	3.2224e-05	-0.11855	0.525311	-0.285261	0.0258546
Phosphorylation of CD3 and TCR zeta chains	CD3D	1.45852e-05	0	0	1	2.92435e-06	-0.24858	0.00822166	-0.485586	2.14791e-06	-0.0931126	0.618336	-0.178083	0.169721
Phosphorylation of CD3 and TCR zeta chains	CD247	1.45852e-05	0	0	1	3.07057e-06	-0.250569	0.00770618	-0.483139	2.45751e-06	-0.0605878	0.74611	-0.191718	0.138831
Phosphorylation of CD3 and TCR zeta chains	CD4	1.12931e-05	0	0	1	5.94376e-07	-0.313716	0.000756445	-0.441091	2.13036e-05	-0.15773	0.396751	-0.256639	0.0458767
Regulation of actin dynamics for phagocytic cup formation	FCGR1A	0.00256728	0	0	1	0.000435132	-0.261394	0.00537139	-0.223911	0.038221	-0.363527	0.0444075	-0.224523	0.0819314
Regulation of actin dynamics for phagocytic cup formation	VAV1	0.000806922	0	0	1	0.00012309	-0.227008	0.0160848	-0.366372	0.000521745	-0.264567	0.150353	-0.198496	0.125144
Regulation of actin dynamics for phagocytic cup formation	ELMO1	0.000227495	0	0	0	3.08468e-05	-0.253068	0.00709939	-0.379968	0.000308038	-0.2577	0.161627	-0.222881	0.0842506
Regulation of actin dynamics for phagocytic cup formation	WIPF1	0.000170518	0	0	0	2.02309e-05	-0.248024	0.00837111	-0.416498	6.64202e-05	na	na	-0.146999	0.258265
Regulation of actin dynamics for phagocytic cup formation	NCKAP1L	5.21933e-05	0	0	0	5.30779e-06	-0.272124	0.00370112	-0.430738	3.47544e-05	-0.155105	0.404756	-0.232466	0.0714129
Regulation of actin dynamics for phagocytic cup formation	CD247	3.62327e-05	0	0	1	3.07057e-06	-0.250569	0.00770618	-0.483139	2.45751e-06	-0.0605878	0.74611	-0.191718	0.138831
Regulation of actin dynamics for phagocytic cup formation	BTK	3.02006e-05	0	0	1	9.56104e-07	-0.259905	0.00564973	-0.497579	1.09309e-06	-0.139352	0.454669	-0.173714	0.180608
Regulation of actin dynamics for phagocytic cup formation	CD3G	3.02006e-05	0	0	1	1.69657e-06	-0.285846	0.00224926	-0.43236	3.2224e-05	-0.11855	0.525311	-0.285261	0.0258546
Regulation of actin dynamics for phagocytic cup formation	WAS	3.02006e-05	0	0	0	2.04646e-06	-0.288638	0.00202627	-0.435213	2.81827e-05	-0.180469	0.331287	-0.238056	0.0646794
Regulation of actin dynamics for phagocytic cup formation	CYFIP2	3.02006e-05	0	0	0	2.0475e-06	-0.294882	0.0015983	-0.453407	1.1653e-05	0.0167626	0.928684	-0.232969	0.0707849
Role of phospholipids in phagocytosis	PIK3R1	0.0140899	0	0	1	0.00410956	-0.192326	0.0421977	-0.349325	0.00097858	-0.0107038	0.954427	-0.125712	0.334362
Role of phospholipids in phagocytosis	ITPR1	0.00427265	0	0	1	0.00106816	-0.196549	0.0377967	-0.327443	0.0020877	-0.295063	0.107084	-0.142498	0.273288
Role of phospholipids in phagocytosis	FCGR1A	0.00208863	0	0	1	0.000435132	-0.261394	0.00537139	-0.223911	0.038221	-0.363527	0.0444075	-0.224523	0.0819314
Role of phospholipids in phagocytosis	PLD4	0.000602469	0	0	0	0.000100411	-0.316479	0.000674969	-0.127822	0.240858	-0.385742	0.0320977	-0.289523	0.0236246
Role of phospholipids in phagocytosis	PLCG2	0.000373471	0	0	1	4.66838e-05	-0.256919	0.00624695	-0.401708	0.000126297	-0.0838131	0.653962	-0.215839	0.0947939
Role of phospholipids in phagocytosis	CD3G	3.68468e-05	0	0	1	1.69657e-06	-0.285846	0.00224926	-0.43236	3.2224e-05	-0.11855	0.525311	-0.285261	0.0258546
Role of phospholipids in phagocytosis	CD247	3.68468e-05	0	0	1	3.07057e-06	-0.250569	0.00770618	-0.483139	2.45751e-06	-0.0605878	0.74611	-0.191718	0.138831
STAT6-mediated induction of chemokines	STAT6	0.0470847	0	0	1	0.0313898	-0.118972	0.21152	-0.29115	0.00653421	-0.24639	0.181492	0.0227965	0.861562
STAT6-mediated induction of chemokines	TMEM173	0.0320588	0	0	1	0.0106863	-0.207703	0.0279855	-0.275658	0.0102015	na	na	0.0244381	0.851703
TCR signaling	PSMB9	0.0469067	0	0	1	0.0108891	-0.22634	0.0164077	-0.164371	0.130453	-0.299708	0.101415	-0.157775	0.224598
TCR signaling	HLA-DRA	0.0464653	0	0	1	0.0103717	-0.21567	0.0223847	-0.244627	0.0232081	-0.166414	0.370925	-0.153777	0.236713
TCR signaling	HLA-DPA1	0.0241599	0	0	0	0.00517713	-0.219503	0.0200516	-0.270197	0.0118686	-0.119964	0.520347	-0.189071	0.144472
TCR signaling	TRAT1	0.0213683	0	0	0	0.00438813	-0.198736	0.0356739	-0.318882	0.00276743	-0.146622	0.431235	-0.124897	0.337528
TCR signaling	PIK3R1	0.0209214	0	0	1	0.00410956	-0.192326	0.0421977	-0.349325	0.00097858	-0.0107038	0.954427	-0.125712	0.334362
TCR signaling	LAT	0.011914	0	0	0	0.00223388	-0.180911	0.0562762	-0.258157	0.016402	-0.237302	0.198652	-0.274299	0.032416
TCR signaling	PTPN22	0.00433231	0	0	0	0.000773626	-0.211374	0.0252719	-0.377067	0.000345366	-0.108048	0.562884	-0.131457	0.312561
TCR signaling	SKP1	0.00253377	0	0	0	0.000429836	-0.315175	0.000712378	-0.270529	0.0117609	na	na	-0.0716991	0.58293
TCR signaling	HLA-DQB2	0.00228044	0	0	0	0.000338056	-0.283557	0.00244834	-0.299987	0.00501308	-0.126225	0.498646	-0.219492	0.0892024
TCR signaling	LCP2	0.00228044	0	0	0	0.000357466	-0.258643	0.00589564	-0.296365	0.00559369	-0.308998	0.0907598	-0.168048	0.195468
TCR signaling	GRAP2	0.00228044	0	0	0	0.000366499	-0.263401	0.00501562	-0.342613	0.00124184	0.0304959	0.870634	-0.205963	0.11128
TCR signaling	PSMB10	0.00203256	0	0	1	0.000272218	-0.261296	0.0053894	-0.274891	0.0104228	-0.308594	0.0912045	-0.224814	0.0815252
TCR signaling	PTPRC	0.00185501	0	0	1	0.000231876	-0.216414	0.0219142	-0.383106	0.000271863	-0.244169	0.185587	-0.132146	0.310011
TCR signaling	HLA-DQA1	0.00128072	0	0	1	0.000148656	-0.248918	0.00813199	-0.313971	0.00324138	-0.319298	0.0799668	-0.216156	0.0942971
TCR signaling	HLA-DQA2	0.000892631	0	0	0	9.5639e-05	-0.321413	0.000549246	-0.173843	0.109427	na	na	-0.31277	0.0141202
TCR signaling	PRKCQ	0.000150621	0	0	1	1.47931e-05	-0.266763	0.00446629	-0.362428	0.00060534	-0.336262	0.0643762	-0.232466	0.0714129
TCR signaling	FYB	0.000115709	0	0	0	8.7933e-06	-0.289983	0.00192617	-0.396616	0.00015649	-0.344341	0.0578419	-0.113029	0.385773
TCR signaling	ITK	0.000115709	0	0	1	9.32745e-06	-0.212966	0.0241671	-0.472388	4.38781e-06	-0.132889	0.476056	-0.189838	0.142819
TCR signaling	HLA-DPB1	0.000115709	0	0	0	1.03312e-05	-0.246881	0.00868559	-0.438617	2.3982e-05	-0.196506	0.289366	-0.193598	0.134927
TCR signaling	CD3E	8.27592e-05	0	0	1	5.17245e-06	-0.279809	0.00280885	-0.417617	6.31909e-05	-0.20822	0.26099	-0.227488	0.0778698
TCR signaling	CD3D	5.73172e-05	0	0	1	2.92435e-06	-0.24858	0.00822166	-0.485586	2.14791e-06	-0.0931126	0.618336	-0.178083	0.169721
TCR signaling	CD247	5.73172e-05	0	0	1	3.07057e-06	-0.250569	0.00770618	-0.483139	2.45751e-06	-0.0605878	0.74611	-0.191718	0.138831
TCR signaling	CD3G	5.73009e-05	0	0	1	1.69657e-06	-0.285846	0.00224926	-0.43236	3.2224e-05	-0.11855	0.525311	-0.285261	0.0258546
TCR signaling	WAS	5.73009e-05	0	0	0	2.04646e-06	-0.288638	0.00202627	-0.435213	2.81827e-05	-0.180469	0.331287	-0.238056	0.0646794
TCR signaling	CD4	4.15264e-05	0	0	1	5.94376e-07	-0.313716	0.000756445	-0.441091	2.13036e-05	-0.15773	0.396751	-0.256639	0.0458767
TCR signaling	EVL	4.15264e-05	0	0	0	7.41543e-07	-0.278097	0.00298883	-0.466737	5.90453e-06	-0.3092	0.090538	-0.153751	0.236794
The AIM2 inflammasome	AIM2	0.000837396	0	0	0	0.000558264	-0.152665	0.108063	-0.323035	0.00241623	-0.470565	0.00755006	-0.0845403	0.517126
The AIM2 inflammasome	CASP1	0.00083539	0	0	1	0.000278463	-0.229832	0.014779	-0.348776	0.000998064	-0.283753	0.121878	-0.153062	0.238925
The IPAF inflammasome	NLRC4	0.00453923	0	0	0	0.00453923	-0.200811	0.0337526	-0.259693	0.0157511	na	na	-0.183616	0.15663
The IPAF inflammasome	CASP1	0.000556926	0	0	1	0.000278463	-0.229832	0.014779	-0.348776	0.000998064	-0.283753	0.121878	-0.153062	0.238925
The NLRP3 inflammasome	PSTPIP1	0.002392	0	0	0	0.000797332	-0.195026	0.0393375	-0.324808	0.0022789	-0.20923	0.258633	-0.234584	0.0687984
The NLRP3 inflammasome	CASP1	0.00189043	0	0	1	0.000278463	-0.229832	0.014779	-0.348776	0.000998064	-0.283753	0.121878	-0.153062	0.238925
The NLRP3 inflammasome	NLRP3	0.00189043	0	0	1	0.000358359	-0.248802	0.00816254	-0.293843	0.00603243	na	na	-0.225847	0.080098
The NLRP3 inflammasome	P2RX7	0.00189043	0	0	1	0.000472607	-0.252037	0.00734447	-0.262689	0.0145454	-0.356862	0.0487576	-0.18261	0.158953
TNF receptor superfamily (TNFSF) members mediating non-canonical NF-kB pathway	CD40LG	0.000323636	0	0	1	0.000121364	-0.241576	0.0102866	-0.322267	0.00247799	0.247955	0.178646	-0.27181	0.0340851
TNF receptor superfamily (TNFSF) members mediating non-canonical NF-kB pathway	CD40	0.000202966	0	0	1	6.3427e-05	-0.280147	0.00277448	-0.319916	0.00267599	-0.355448	0.0497225	-0.169504	0.191568
TNF receptor superfamily (TNFSF) members mediating non-canonical NF-kB pathway	LTB	0.000114223	0	0	1	2.85556e-05	-0.181348	0.0556747	-0.474493	3.92312e-06	-0.113703	0.5425	-0.156239	0.229199
TNF receptor superfamily (TNFSF) members mediating non-canonical NF-kB pathway	LTA	8.67418e-05	0	0	1	1.31645e-05	-0.312376	0.000799077	-0.348282	0.00101583	-0.090294	0.62905	-0.294554	0.0212042
TNF receptor superfamily (TNFSF) members mediating non-canonical NF-kB pathway	TNFSF13B	8.67418e-05	0	0	1	1.62641e-05	-0.321096	0.000556619	-0.32203	0.00249733	-0.268606	0.143993	-0.234028	0.0694772
TNF receptor superfamily (TNFSF) members mediating non-canonical NF-kB pathway	TNFSF14	8.60729e-06	0	0	1	5.37955e-07	-0.316236	0.000681811	-0.371975	0.000421063	-0.342927	0.0589461	-0.308813	0.0154559
TNFR2 non-canonical NF-kB pathway	TNFRSF4	0.0468776	0	0	1	0.0066968	-0.22462	0.0172657	-0.215843	0.0459392	-0.145815	0.433806	-0.230957	0.0733238
TNFR2 non-canonical NF-kB pathway	TNFSF18	0.0233297	0	0	0	0.00309476	-0.252429	0.00725033	-0.14363	0.18706	0.145815	0.433806	-0.30887	0.015436
TNFR2 non-canonical NF-kB pathway	TNFRSF1B	0.0187849	0	0	1	0.0023002	-0.200879	0.0336907	-0.316398	0.00299876	0.0450369	0.809887	-0.229315	0.0754482
TNFR2 non-canonical NF-kB pathway	TNFRSF17	0.00844505	0	0	1	0.000947914	-0.110603	0.245662	-0.43289	3.14334e-05	0.0977483	0.600884	-0.103405	0.427752
TNFR2 non-canonical NF-kB pathway	SKP1	0.00421239	0	0	0	0.000429836	-0.315175	0.000712378	-0.270529	0.0117609	na	na	-0.0716991	0.58293
TNFR2 non-canonical NF-kB pathway	PSMB10	0.00296415	0	0	1	0.000272218	-0.261296	0.0053894	-0.274891	0.0104228	-0.308594	0.0912045	-0.224814	0.0815252
TNFR2 non-canonical NF-kB pathway	TNFRSF13B	0.00211514	0	0	1	0.000172665	-0.188409	0.0466549	-0.412127	8.0563e-05	0.0699061	0.70864	-0.219217	0.0896154
TNFR2 non-canonical NF-kB pathway	CD40LG	0.00169909	0	0	1	0.000121364	-0.241576	0.0102866	-0.322267	0.00247799	0.247955	0.178646	-0.27181	0.0340851
TNFR2 non-canonical NF-kB pathway	CD40	0.00103597	0	0	1	6.3427e-05	-0.280147	0.00277448	-0.319916	0.00267599	-0.355448	0.0497225	-0.169504	0.191568
TNFR2 non-canonical NF-kB pathway	LTB	0.00055969	0	0	1	2.85556e-05	-0.181348	0.0556747	-0.474493	3.92312e-06	-0.113703	0.5425	-0.156239	0.229199
TNFR2 non-canonical NF-kB pathway	CD27	0.00039847	0	0	1	1.28613e-05	-0.188061	0.0470694	-0.444637	1.79494e-05	na	na	-0.211523	0.101747
TNFR2 non-canonical NF-kB pathway	LTA	0.00039847	0	0	1	1.31645e-05	-0.312376	0.000799077	-0.348282	0.00101583	-0.090294	0.62905	-0.294554	0.0212042
TNFR2 non-canonical NF-kB pathway	TNFSF13B	0.00039847	0	0	1	1.62641e-05	-0.321096	0.000556619	-0.32203	0.00249733	-0.268606	0.143993	-0.234028	0.0694772
TNFR2 non-canonical NF-kB pathway	TNFSF14	5.27196e-05	0	0	1	5.37955e-07	-0.316236	0.000681811	-0.371975	0.000421063	-0.342927	0.0589461	-0.308813	0.0154559
TNFs bind their physiological receptors	TNFRSF4	0.0200904	0	0	1	0.0066968	-0.22462	0.0172657	-0.215843	0.0459392	-0.145815	0.433806	-0.230957	0.0733238
TNFs bind their physiological receptors	TNFSF18	0.0104448	0	0	0	0.00309476	-0.252429	0.00725033	-0.14363	0.18706	0.145815	0.433806	-0.30887	0.015436
TNFs bind their physiological receptors	TNFRSF1B	0.00887219	0	0	1	0.0023002	-0.200879	0.0336907	-0.316398	0.00299876	0.0450369	0.809887	-0.229315	0.0754482
TNFs bind their physiological receptors	TNFRSF17	0.00426561	0	0	1	0.000947914	-0.110603	0.245662	-0.43289	3.14334e-05	0.0977483	0.600884	-0.103405	0.427752
TNFs bind their physiological receptors	TNFRSF13B	0.00093239	0	0	1	0.000172665	-0.188409	0.0466549	-0.412127	8.0563e-05	0.0699061	0.70864	-0.219217	0.0896154
TNFs bind their physiological receptors	CD27	0.000109783	0	0	1	1.28613e-05	-0.188061	0.0470694	-0.444637	1.79494e-05	na	na	-0.211523	0.101747
TNFs bind their physiological receptors	LTA	0.000109783	0	0	1	1.31645e-05	-0.312376	0.000799077	-0.348282	0.00101583	-0.090294	0.62905	-0.294554	0.0212042
TNFs bind their physiological receptors	TNFSF13B	0.000109783	0	0	1	1.62641e-05	-0.321096	0.000556619	-0.32203	0.00249733	-0.268606	0.143993	-0.234028	0.0694772
TNFs bind their physiological receptors	TNFSF14	1.45248e-05	0	0	1	5.37955e-07	-0.316236	0.000681811	-0.371975	0.000421063	-0.342927	0.0589461	-0.308813	0.0154559
Toll Like Receptor 4 (TLR4) Cascade	LY96	0.0338825	0	0	1	0.00301601	-0.234699	0.0127438	-0.229372	0.0336369	-0.291831	0.111166	-0.172287	0.184272
Toll Like Receptor 4 (TLR4) Cascade	MAPK14	0.0338825	0	0	1	0.00325389	0.216166	0.0220701	0.327538	0.0020811	0.154095	0.407859	0.0844344	0.517653
Toll Like Receptor 4 (TLR4) Cascade	MAPK10	0.0338825	0	0	1	0.00338825	-0.166835	0.0787212	-0.301551	0.0047793	-0.296072	0.105832	-0.147449	0.256794
Toll Like Receptor 4 (TLR4) Cascade	SKP1	0.00573115	0	0	0	0.000429836	-0.315175	0.000712378	-0.270529	0.0117609	na	na	-0.0716991	0.58293
Toll Like Receptor 4 (TLR4) Cascade	MEF2C	0.00317457	0	0	0	0.000211638	-0.192515	0.0419928	-0.428434	3.86702e-05	-0.193275	0.297527	-0.0621674	0.634103
Toll Like Receptor 4 (TLR4) Cascade	CD36	0.00269846	0	0	1	0.00015741	-0.248323	0.00829034	-0.387344	0.0002292	-0.133091	0.47538	-0.154015	0.235978
Toll Like Receptor 4 (TLR4) Cascade	CD14	0.00100267	0	0	1	4.18995e-05	-0.323766	0.000497199	-0.215872	0.0459099	-0.350601	0.0531464	-0.269904	0.0354115
Toll Like Receptor 4 (TLR4) Cascade	PLCG2	0.00100267	0	0	1	4.66838e-05	-0.256919	0.00624695	-0.401708	0.000126297	-0.0838131	0.653962	-0.215839	0.0947939
Toll Like Receptor 4 (TLR4) Cascade	TLR1	0.00100267	0	0	0	5.01333e-05	-0.270131	0.00397076	-0.361091	0.00063634	-0.2577	0.161627	-0.195796	0.130469
Toll Like Receptor 4 (TLR4) Cascade	ITGB2	0.000994901	0	0	1	2.48725e-05	-0.300832	0.00126862	-0.296508	0.00556958	-0.345956	0.0566	-0.24446	0.0576023
Toll Like Receptor 4 (TLR4) Cascade	LY86	0.000863372	0	0	0	1.43895e-05	-0.315833	0.000693258	-0.319792	0.00268675	-0.312261	0.0872272	-0.230401	0.0740379
Toll Like Receptor 4 (TLR4) Cascade	BTK	0.000114732	0	0	1	9.56104e-07	-0.259905	0.00564973	-0.497579	1.09309e-06	-0.139352	0.454669	-0.173714	0.180608
Toll-Like Receptors Cascades	LY96	0.0323013	0	0	1	0.00301601	-0.234699	0.0127438	-0.229372	0.0336369	-0.291831	0.111166	-0.172287	0.184272
Toll-Like Receptors Cascades	MAPK14	0.0323013	0	0	1	0.00325389	0.216166	0.0220701	0.327538	0.0020811	0.154095	0.407859	0.0844344	0.517653
Toll-Like Receptors Cascades	MAPK10	0.0323013	0	0	1	0.00338825	-0.166835	0.0787212	-0.301551	0.0047793	-0.296072	0.105832	-0.147449	0.256794
Toll-Like Receptors Cascades	TLR8	0.0245204	0	0	1	0.00205766	-0.189203	0.0457211	-0.317081	0.00293352	-0.197112	0.287852	-0.191904	0.138442
Toll-Like Receptors Cascades	TLR10	0.0154659	0	0	0	0.00118968	-0.189821	0.0450055	-0.364372	0.000562726	-0.173483	0.350653	-0.135383	0.298201
Toll-Like Receptors Cascades	SKP1	0.00614666	0	0	0	0.000429836	-0.315175	0.000712378	-0.270529	0.0117609	na	na	-0.0716991	0.58293
Toll-Like Receptors Cascades	MEF2C	0.00349469	0	0	0	0.000211638	-0.192515	0.0419928	-0.428434	3.86702e-05	-0.193275	0.297527	-0.0621674	0.634103
Toll-Like Receptors Cascades	TLR7	0.00349469	0	0	1	0.000219945	-0.258917	0.0058415	-0.352179	0.00088291	-0.230032	0.213166	-0.13707	0.292164
Toll-Like Receptors Cascades	CD36	0.00321566	0	0	1	0.00015741	-0.248323	0.00829034	-0.387344	0.0002292	-0.133091	0.47538	-0.154015	0.235978
Toll-Like Receptors Cascades	CD14	0.00119484	0	0	1	4.18995e-05	-0.323766	0.000497199	-0.215872	0.0459099	-0.350601	0.0531464	-0.269904	0.0354115
Toll-Like Receptors Cascades	PLCG2	0.00119484	0	0	1	4.66838e-05	-0.256919	0.00624695	-0.401708	0.000126297	-0.0838131	0.653962	-0.215839	0.0947939
Toll-Like Receptors Cascades	TLR1	0.00119484	0	0	0	5.01333e-05	-0.270131	0.00397076	-0.361091	0.00063634	-0.2577	0.161627	-0.195796	0.130469
Toll-Like Receptors Cascades	ITGB2	0.00118559	0	0	1	2.48725e-05	-0.300832	0.00126862	-0.296508	0.00556958	-0.345956	0.0566	-0.24446	0.0576023
Toll-Like Receptors Cascades	LY86	0.00102885	0	0	0	1.43895e-05	-0.315833	0.000693258	-0.319792	0.00268675	-0.312261	0.0872272	-0.230401	0.0740379
Toll-Like Receptors Cascades	BTK	0.000136723	0	0	1	9.56104e-07	-0.259905	0.00564973	-0.497579	1.09309e-06	-0.139352	0.454669	-0.173714	0.180608
Trafficking and processing of endosomal TLR	CTSB	0.0190289	0	0	1	0.00645812	-0.20482	0.0302874	-0.166969	0.124402	-0.389922	0.0301259	-0.162197	0.21171
Trafficking and processing of endosomal TLR	CTSS	0.0190289	0	0	1	0.00691959	-0.214947	0.0228499	-0.295407	0.00575683	-0.115925	0.534589	-0.115624	0.37489
Trafficking and processing of endosomal TLR	TLR8	0.0113171	0	0	1	0.00205766	-0.189203	0.0457211	-0.317081	0.00293352	-0.197112	0.287852	-0.191904	0.138442
Trafficking and processing of endosomal TLR	TLR7	0.0024194	0	0	1	0.000219945	-0.258917	0.0058415	-0.352179	0.00088291	-0.230032	0.213166	-0.13707	0.292164
Transfer of LPS from LBP carrier to CD14	CD14	8.37989e-05	0	0	1	4.18995e-05	-0.323766	0.000497199	-0.215872	0.0459099	-0.350601	0.0531464	-0.269904	0.0354115
Translocation of ZAP-70 to Immunological synapse	HLA-DQB1	0.0294941	0	0	0	0.0258074	-0.149144	0.116538	-0.229733	0.0333514	-0.296274	0.105583	-0.110355	0.397184
Translocation of ZAP-70 to Immunological synapse	ZAP70	0.0269826	0	0	1	0.0219234	-0.202646	0.0321267	-0.177853	0.10136	-0.0743285	0.691082	-0.244645	0.0574072
Translocation of ZAP-70 to Immunological synapse	HLA-DRA	0.0138289	0	0	1	0.0103717	-0.21567	0.0223847	-0.244627	0.0232081	-0.166414	0.370925	-0.153777	0.236713
Translocation of ZAP-70 to Immunological synapse	HLA-DPA1	0.00753037	0	0	0	0.00517713	-0.219503	0.0200516	-0.270197	0.0118686	-0.119964	0.520347	-0.189071	0.144472
Translocation of ZAP-70 to Immunological synapse	PTPN22	0.0012378	0	0	0	0.000773626	-0.211374	0.0252719	-0.377067	0.000345366	-0.108048	0.562884	-0.131457	0.312561
Translocation of ZAP-70 to Immunological synapse	HLA-DQB2	0.000600989	0	0	0	0.000338056	-0.283557	0.00244834	-0.299987	0.00501308	-0.126225	0.498646	-0.219492	0.0892024
Translocation of ZAP-70 to Immunological synapse	HLA-DQA1	0.000297311	0	0	1	0.000148656	-0.248918	0.00813199	-0.313971	0.00324138	-0.319298	0.0799668	-0.216156	0.0942971
Translocation of ZAP-70 to Immunological synapse	HLA-DQA2	0.000218603	0	0	0	9.5639e-05	-0.321413	0.000549246	-0.173843	0.109427	na	na	-0.31277	0.0141202
Translocation of ZAP-70 to Immunological synapse	HLA-DPB1	2.75498e-05	0	0	0	1.03312e-05	-0.246881	0.00868559	-0.438617	2.3982e-05	-0.196506	0.289366	-0.193598	0.134927
Translocation of ZAP-70 to Immunological synapse	CD3E	1.65518e-05	0	0	1	5.17245e-06	-0.279809	0.00280885	-0.417617	6.31909e-05	-0.20822	0.26099	-0.227488	0.0778698
Translocation of ZAP-70 to Immunological synapse	CD3G	1.22823e-05	0	0	1	1.69657e-06	-0.285846	0.00224926	-0.43236	3.2224e-05	-0.11855	0.525311	-0.285261	0.0258546
Translocation of ZAP-70 to Immunological synapse	CD3D	1.22823e-05	0	0	1	2.92435e-06	-0.24858	0.00822166	-0.485586	2.14791e-06	-0.0931126	0.618336	-0.178083	0.169721
Translocation of ZAP-70 to Immunological synapse	CD247	1.22823e-05	0	0	1	3.07057e-06	-0.250569	0.00770618	-0.483139	2.45751e-06	-0.0605878	0.74611	-0.191718	0.138831
Translocation of ZAP-70 to Immunological synapse	CD4	9.51001e-06	0	0	1	5.94376e-07	-0.313716	0.000756445	-0.441091	2.13036e-05	-0.15773	0.396751	-0.256639	0.0458767
TRIF-mediated programmed cell death	LY96	0.0135721	0	0	1	0.00301601	-0.234699	0.0127438	-0.229372	0.0336369	-0.291831	0.111166	-0.172287	0.184272
TRIF-mediated programmed cell death	CD14	0.000377095	0	0	1	4.18995e-05	-0.323766	0.000497199	-0.215872	0.0459099	-0.350601	0.0531464	-0.269904	0.0354115
