# Supplementary figures and images for: Immune signatures correlate with L1 retrotransposition in gastrointestinal cancers
Source: PubMed Central journal article supplement — Genome Res. 2018 Aug;28(8):1136–46. doi: 10.1101/gr.231837.117 (PMC6071633; doi:10.1101/gr.231837.117), 2018-08

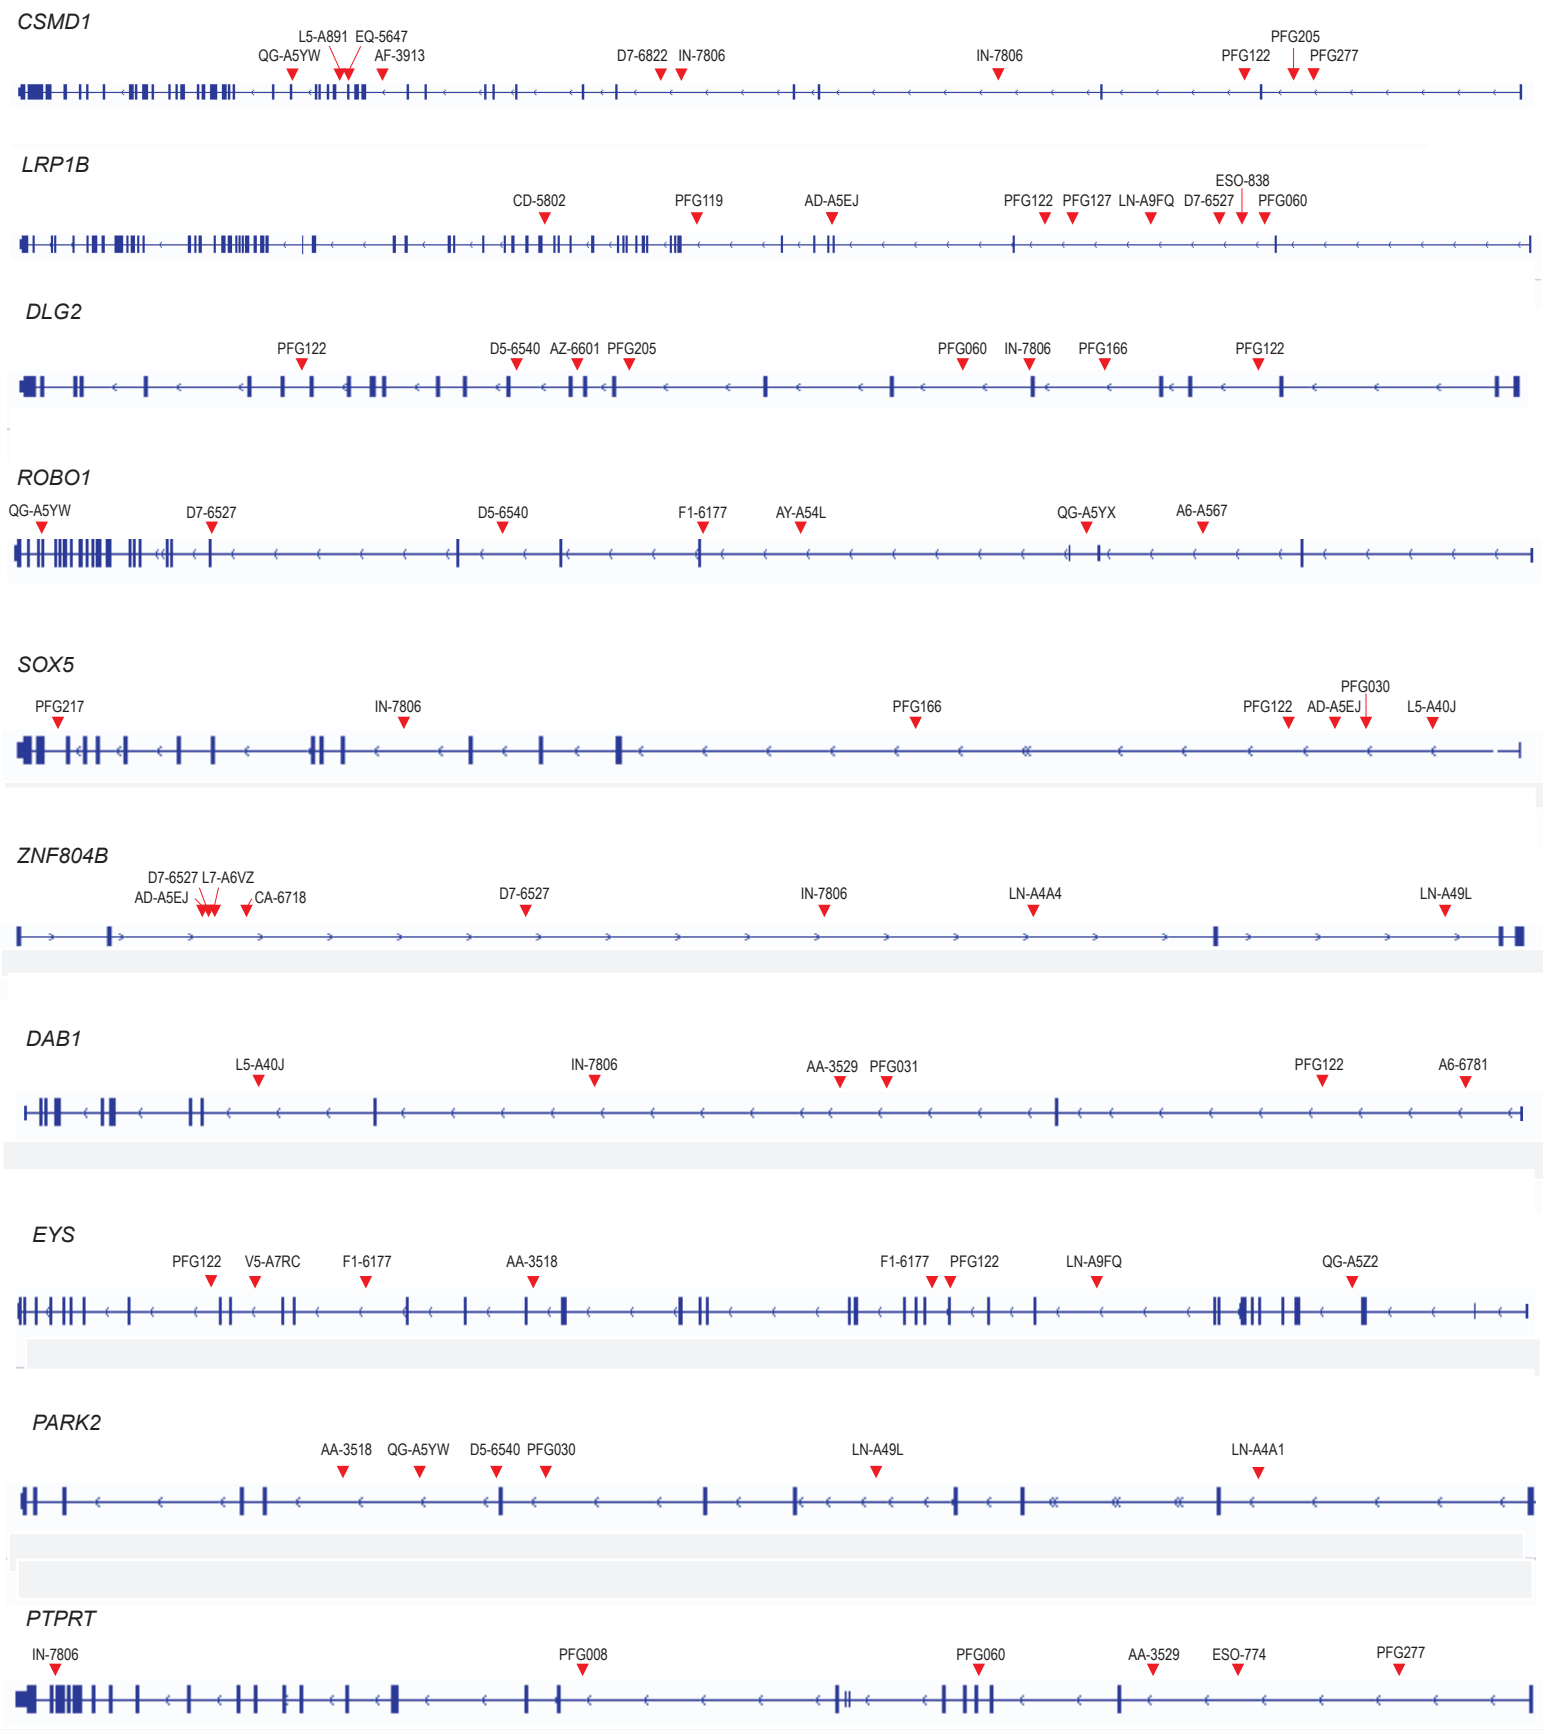

**Supplemental Figure S8. Map of L1 insertions in the top ten recurrently affected genes**

Supplement: supp_gr.231837.117_Supplemental_Fig_S8.pdf [file supp_gr.231837.117_Supplemental_Fig_S8.pdf]
